# Supplementary material for: Diabetes mellitus monitoring and control among adults in Australian general practice: a national retrospective cohort study
Source: PubMed Central journal article supplement — BMJ Open. 2023 Apr 25;13(4):e069875. doi: 10.1136/bmjopen-2022-069875 (PMC10151933; doi:10.1136/bmjopen-2022-069875), 2023-04-25
Supplement: bmjopen-2022-069875.draft_revisions.pdf [file bmjopen-2022-069875.draft_revisions.pdf]

# BMJ Open

BMJ Open is committed to open peer review. As part of this commitment we make the peer review history of every article we publish publicly available.

When an article is published we post the peer reviewers' comments and the authors' responses online. We also post the versions of the paper that were used during peer review. These are the versions that the peer review comments apply to.

The versions of the paper that follow are the versions that were submitted during the peer review process. They are not the versions of record or the final published versions. They should not be cited or distributed as the published version of this manuscript.

BMJ Open is an open access journal and the full, final, typeset and author-corrected version of record of the manuscript is available on our site with no access controls, subscription charges or pay-per-view fees (<http://bmjopen.bmj.com>).

If you have any questions on BMJ Open's open peer review process please email [info.bmjopen@bmj.com](mailto:info.bmjopen@bmj.com)

# BMJ Open

## Diabetes mellitus monitoring and control among adults in Australian general practice: a national study

|                               |                                                                                                                                                                                                                                                                                                                                                                                                                                                                                                                                                                                                  |
|-------------------------------|--------------------------------------------------------------------------------------------------------------------------------------------------------------------------------------------------------------------------------------------------------------------------------------------------------------------------------------------------------------------------------------------------------------------------------------------------------------------------------------------------------------------------------------------------------------------------------------------------|
| Journal:                      | <i>BMJ Open</i>                                                                                                                                                                                                                                                                                                                                                                                                                                                                                                                                                                                  |
| Manuscript ID                 | bmjopen-2022-069875                                                                                                                                                                                                                                                                                                                                                                                                                                                                                                                                                                              |
| Article Type:                 | Original research                                                                                                                                                                                                                                                                                                                                                                                                                                                                                                                                                                                |
| Date Submitted by the Author: | 08-Nov-2022                                                                                                                                                                                                                                                                                                                                                                                                                                                                                                                                                                                      |
| Complete List of Authors:     | Zheng, Mingyue; The University of Adelaide, Discipline of General Practice, Adelaide Medical School<br>Bernardo, Carla; The University of Adelaide, Discipline of General Practice, Adelaide Medical School<br>Stocks, Nigel; The University of Adelaide, Discipline of General Practice, Adelaide Medical School<br>Hu, Peng; Chengdu University of Traditional Chinese Medicine, School of Health and Rehabilitation<br>Gonzalez-Chica, David; The University of Adelaide, Discipline of General Practice, Adelaide Medical School; The University of Adelaide, Adelaide Rural Clinical School |
| Keywords:                     | Epidemiology < TROPICAL MEDICINE, DIABETES & ENDOCRINOLOGY, Public health < INFECTIOUS DISEASES                                                                                                                                                                                                                                                                                                                                                                                                                                                                                                  |
|                               |                                                                                                                                                                                                                                                                                                                                                                                                                                                                                                                                                                                                  |

SCHOLARONE™  
Manuscripts

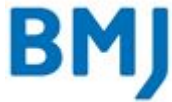

I, the Submitting Author has the right to grant and does grant on behalf of all authors of the Work (as defined in the below author licence), an exclusive licence and/or a non-exclusive licence for contributions from authors who are: i) UK Crown employees; ii) where BMJ has agreed a CC-BY licence shall apply, and/or iii) in accordance with the terms applicable for US Federal Government officers or employees acting as part of their official duties; on a worldwide, perpetual, irrevocable, royalty-free basis to BMJ Publishing Group Ltd ("BMJ") its licensees and where the relevant Journal is co-owned by BMJ to the co-owners of the Journal, to publish the Work in this journal and any other BMJ products and to exploit all rights, as set out in our [licence](#).

The Submitting Author accepts and understands that any supply made under these terms is made by BMJ to the Submitting Author unless you are acting as an employee on behalf of your employer or a postgraduate student of an affiliated institution which is paying any applicable article publishing charge ("APC") for Open Access articles. Where the Submitting Author wishes to make the Work available on an Open Access basis (and intends to pay the relevant APC), the terms of reuse of such Open Access shall be governed by a Creative Commons licence – details of these licences and which [Creative Commons](#) licence will apply to this Work are set out in our licence referred to above.

Other than as permitted in any relevant BMJ Author's Self Archiving Policies, I confirm this Work has not been accepted for publication elsewhere, is not being considered for publication elsewhere and does not duplicate material already published. I confirm all authors consent to publication of this Work and authorise the granting of this licence.

1  
2  
3 1 **Diabetes mellitus monitoring and control among adults in Australian general practice: a**  
4  
5 2 **national study**  
6  
7 3

9 4 Mingyue Zheng<sup>1</sup>, Carla De Oliveira Bernardo<sup>1</sup>, Nigel Stocks<sup>1</sup>, Peng Hu<sup>2</sup>, David Gonzalez-  
10  
11 Chica<sup>1,3</sup>  
12

13  
14 6 <sup>1</sup> Discipline of General Practice, Adelaide Medical School, University of Adelaide, Adelaide,  
15  
16 7 Australia.  
17

18  
19 8 <sup>2</sup> School of Health and Rehabilitation, Chengdu University of Traditional Chinese Medicine,  
20  
21 9 Chengdu, China.  
22

23  
24  
25 10 <sup>3</sup> Adelaide Rural Clinical School, University of Adelaide, Adelaide, Australia.  
26  
27

28 11

29  
30 12 Correspondence: David Gonzalez-Chica

31  
32 13 E-mail: [david.gonzalez@adelaide.edu.au](mailto:david.gonzalez@adelaide.edu.au) (DGC)  
33

34 14 Word count: 3,974 words  
35  
36 15

1  
2  
3 16 **Abstract**

4  
5 17 **Objectives:** Regular monitoring of clinical parameters among patients with diabetes mellitus  
6  
7 18 is essential for diabetes control and early detection of complications, especially among those  
8  
9 19 with a recent diagnosis. This study investigated whether the monitoring and control of clinical  
10  
11 20 parameters in patients with past or newly recorded diabetes diagnosis differed by  
12  
13 21 sociodemographic or clinical characteristics.

14  
15  
16 22 **Design:** Retrospective cohort study.

17  
18  
19 23 **Setting:** MedicineInsight, a national general practice database in Australia.

20  
21 24 **Participants:** This study included 101,875 regular adults with past (2015-2016) and 9,236 with  
22  
23 25 newly recorded (2017) diabetes diagnosis who visited their doctor in 2018.

24  
25 26 **Main outcome measures:** 'Well-controlled' diabetes was defined as HbA1c  $\leq$ 7.0%, blood  
26  
27 27 pressure (BP)  $\leq$ 140/90mmHg, and total cholesterol  $<$ 4.0mmol/L. Adjusted odds ratio (OR) and  
28  
29 28 adjusted probabilities (%) were obtained based on logistic regression models adjusted for  
30  
31 29 practice variables and patients' sociodemographic and clinical characteristics.

32  
33 30 **Results:** HbA1c was monitored in 45.2% (95% CI, 42.6-47.7) of patients with past and 39.4%  
34  
35 31 (95% CI, 37.1-41.7) with newly recorded diabetes. The monitoring of HbA1c, BP, or total  
36  
37 32 cholesterol levels was no better among smokers, patients with hypertension or cardiovascular  
38  
39 33 disease compared to patients without these risk factors. HbA1c control was achieved by 54.4%  
40  
41 34 (95% CI, 53.4-55.4) and 78.5% (95% CI, 76.8-80.1) of monitored patients with past or newly  
42  
43 35 recorded diabetes, respectively. Less than 20% of patients had their HbA1c, BP, and total  
44  
45 36 cholesterol levels controlled. Patients with a history of CVD were more likely to have the three  
46  
47 37 clinical parameters controlled than those without a history of CVD, especially among those  
48  
49 38 with newly (adjusted OR=2.43, 95%CI 1.85-3.19) than past recorded diabetes (adjusted  
50  
51 39 OR=1.39, 95%CI 1.30-1.49).

1  
2  
3 40 **Conclusions:** The monitoring of clinical parameters among patients with diabetes attending  
4  
5 41 Australian general practices was suboptimal, and only one in five of these patients achieved  
6  
7 42 control of all clinical parameters.  
8

9 43 **Keywords:** Epidemiological Monitoring, Evidence-Based Practice, Population Health  
10  
11  
12 44

#### 13 14 45 **Strengths and limitations of this study**

- 15  
16 46 ● This is the first national study to investigate diabetes monitoring and control based on  
17  
18 47 electronic medical records, using a large sample of patients attending primary healthcare  
19  
20 48 services across all Australian states and territories.  
21  
22  
23 49 ● This study explored socioeconomic and clinical variables related to diabetes monitoring  
24  
25 50 and control that were not included in the most recent Australian studies on the same topic.  
26  
27  
28 51 ● Some other relevant covariates (e.g., diet and exercise) were not explored, as they are not  
29  
30 52 consistently recorded in the electronic medical records, or are recorded in the progress  
31  
32 53 notes which cannot be extracted because of confidentiality issues.  
33  
34  
35 54 ● Patients may have had their diabetes parameters monitored somewhere else (e.g., different  
36  
37 55 practices or specialists). To minimize it, we used different fields to identify laboratory  
38  
39 56 results that were not requested and automatically reported to the practice by the  
40  
41 57 laboratories.  
42  
43  
44 58

## 59 Introduction

60 Diabetes mellitus is a lifelong disease that requires regular monitoring and control to reduce  
61 the risk of diabetes-related complications.<sup>1-5</sup> Micro- and macrovascular complications of  
62 uncontrolled diabetes (e.g., hypertension, dyslipidaemia, chronic kidney disease-CKD,  
63 cardiovascular disease-CVD) increase the health burden worldwide.<sup>6</sup> Blood glucose control is  
64 the most critical clinical goal of diabetes management, but other clinical variables also require  
65 regular monitoring.<sup>3</sup> The Royal Australian College of General Practitioners (RACGP)  
66 guideline recommends patients with diabetes should have their HbA1c, blood pressure (BP),  
67 and lipid levels evaluated annually to improve management and control of these clinical  
68 parameters.<sup>7</sup> However, different stages of diabetes, such as recent or past diagnosis, may  
69 require different management strategies. In the early stages, diabetes treatment includes  
70 lifestyle modification and usually, metformin. However, depending on individual factors, such  
71 as the presence of co-morbidities, the treatment may include other options.<sup>7</sup> Since diabetes is a  
72 progressive disease, maintaining controlled target levels with monotherapy is often possible  
73 for several years, after which combination therapy may be necessary. Monitoring clinical  
74 parameters is essential to evaluate and modify management accordingly.<sup>8</sup> However, gaps  
75 between real-world practice and guideline recommendations for diabetes management have  
76 been reported worldwide.<sup>4,9-11</sup> For instance, a survey of 305 primary care physicians in the US  
77 showed that 38% of them reported using guidelines for diabetes management.<sup>9</sup>

78 A systematic review including 123 Australian studies found that approximately 50% of patients  
79 with diabetes received 'standard care' (i.e., assessment of HbA1c, BP, lipids, weight, eye, foot  
80 health). Among those assessed, 40-60% met management targets for HbA1c, BP, or lipid  
81 levels, but the study did not report the proportion that had all three parameters under control.<sup>11</sup>  
82 Most studies included in that review used EMRs to investigate diabetes control. However, most  
83 studies also sourced data from specialized centres rather than primary healthcare settings, or

1  
2  
3 84 used non-representative samples, hindering the generalizability of the results at a national level.  
4  
5 85 Additionally, other potential determinants of diabetes management and control (e.g.,  
6  
7 86 sociodemographic and clinical variables) were not widely investigated. Despite these  
8  
9 87 limitations, figures in that review are consistent with measured data from Australian Health  
10  
11 88 Survey (AHS) (2011-2012), which reported that 54.7% of adults with known diabetes met the  
12  
13 89 HbA1c target ( $\leq 7.0\%$ ), 39% the recommended BP target, and 38% the total cholesterol (TC)  
14  
15 90 target.<sup>12</sup>  
16  
17  
18 91 Although EMR-based primary care databases have not been widely used, they can provide  
19  
20 92 accurate information on diabetes prevalence,<sup>13-15</sup> management and control.<sup>11,16</sup> EMR-based  
21  
22 93 research can improve diabetes management without increasing overall treatment costs.<sup>17,18</sup>  
23  
24 94 Moreover, EMR databases minimize self-report bias by providing information on doctor-  
25  
26 95 reported diagnoses, objective laboratory results, and prescribed medications.<sup>13,14,19</sup>  
27  
28  
29  
30  
31 96 Thus, this study used a national general practice database to investigate 1) the proportion of  
32  
33 97 patients with diabetes who had their clinical parameters for diabetes management monitored in  
34  
35 98 2018; 2) the proportion of those monitored who achieved diabetes control (i.e., HbA1c, BP,  
36  
37 99 TC); and 3) whether diabetes monitoring or control was influenced by sociodemographic,  
38  
39  
40 100 cardiovascular risk factors or co-morbidities. These aims were assessed according to whether  
41  
42 101 patients had past or newly recorded diabetes in the EMRs.  
43  
44

## 102 **Methods**

### 103 **Data Source**

104 We used retrospective data from an open cohort database (MedicineInsight) that includes de-  
105 identified EMRs from approximately 662 general practices (8.2% of all Australian practices)  
106 and over 2,700 general practitioners (GP) across Australia.<sup>19</sup> Details of data extraction and  
107 database characteristics have been published elsewhere.<sup>19</sup> Although practices in



1  
2  
3 108 MedicineInsight were selected using a non-random process, all Australian states and territories,  
4  
5 109 urban and rural settings and socioeconomic settings are represented in the database. Diagnostic  
6  
7 110 algorithms used for identifying patients with chronic disease using MedicineInsight have been  
8  
9 111 validated, showing sensitivity of 89% against the recording of diabetes in the original EMR.<sup>14</sup>

## 112 **Study Sample**

113 This study was reported according to the REporting of studies Conducted using Observational  
114 Routinely collected health Data Statement.<sup>20</sup> Only data from practices with regular data  
115 provision (i.e., no gap of more than 6-weeks in data provision in the previous two years) was  
116 included. The sample was adults (18+ years) who regularly attended the practice (i.e., those  
117 with at least one consultation per year between 2015-2018 and had a diagnosis of diabetes  
118 (either type 1 or type 2). Using 4-years of data to define the cohort was necessary to  
119 differentiate patients with past or newly recorded diabetes diagnosis (2015-2017), and to ensure  
120 all patients had at least one visit in the last 12 months (2018) that the GP could have used to  
121 monitor their clinical parameters.<sup>7</sup>

122 Three fields ('diagnosis', 'reason for encounter', 'reason for prescription') were initially  
123 searched to identify patients with recorded diabetes diagnoses. The original search was based  
124 on the methods for data extraction used by MedicineInsight.<sup>14,19</sup> It included standard clinical  
125 terminology, misspellings, and abbreviations, and then expanded to include prescribed  
126 medications and laboratory results. Using as much information as possible from EMRs (i.e.,  
127 observations, medications, diagnostic information) can provide a more accurate picture for  
128 identifying diabetes.<sup>21</sup> Besides, including laboratory results from EMRs are associated with  
129 higher rates of diabetes ascertainment.<sup>22,23</sup>

130 Patients were classified as having past recorded diabetes (i.e. past diabetes) if between  
131 Jan/2015-Dec/2016: 1) 'diabetes' was recorded in two different fields; OR 2) antidiabetic

1  
2  
3 132 medications were prescribed [Anatomical Therapeutic Chemical A10A or A10B;<sup>24</sup> metformin  
4  
5 133 was considered only in the absence of polycystic ovary syndrome diagnosis]; OR 3) a diabetes  
6  
7 134 diagnosis was recorded only once BUT there was at least one recorded laboratory result (fasting  
8  
9 135 blood glucose, HbA1c or 2-hour oral glucose tolerance test) above the diabetes diagnosis  
10  
11 136 threshold within the same timeframe.<sup>7</sup> Patients were classified as having newly recorded  
12  
13 137 diabetes (i.e. recent diabetes) if: 1) they did not meet the criteria for past recorded diabetes  
14  
15 138 AND 2) between Jan-Dec 2017 they presented any of the three criteria mentioned above for  
16  
17 139 diabetes diagnosis (i.e., 'diabetes' recorded in two fields, antidiabetic medications were  
18  
19 140 prescribed OR 'diabetes' was recorded once only but there was at least one abnormal glycaemic  
20  
21 141 result recorded in 2017).

## 142 **Outcomes**

143 The first group of outcomes was the proportion of patients with diabetes who had their clinical  
144 parameters for diabetes management checked in 2018 (i.e., HbA1c, BP, TC, low-density  
145 lipoprotein-LDL, high-density lipoprotein-HDL, triglycerides, estimated glomerular filtration  
146 rate-eGFR, or albumin to creatinine ratio-ACR).<sup>7</sup> These clinical parameters were obtained from  
147 the fields 'observations' and 'laboratory results' using Logical Observation Identifiers Names  
148 and Codes.<sup>25</sup>

149 According to the guideline, patients with diabetes should achieve recommended targets for all  
150 clinical parameters (i.e. HbA1c, lipids [TC, HDL, LDL, non-HDL, triglycerides], BP, and urine  
151 albumin excretion).<sup>7</sup> However, three key parameters (HbA1c, BP and TC) can be used to define  
152 'well-controlled' diabetes, since they indicate that patients can comprehensively manage their  
153 diabetes and reduce the risk of complications.<sup>10,11</sup> Therefore, the second group of outcomes  
154 was the proportion of patients, among those checked, that achieved recommended targets in  
155 2018 [HbA1c $\leq$ 7.0%, BP $\leq$ 140/90mmHg, TC $<$ 4.0mmol/L]. When multiple results were

156 reported in 2018 for the same parameter and patient, the mean of these results was estimated  
157 and used for analysis.

158 ‘Well-controlled’ diabetes was then explored using three different approaches. First, we  
159 analysed each clinical parameter as a different outcome: i) controlled HbA1c, ii) controlled BP,  
160 or iii) controlled TC. Second, based on whether each of these three parameters was controlled  
161 or not, we created an outcome variable with eight categories to explore the most frequent  
162 combination of parameters that were under control: 1) none controlled, 2) HbA1c only, 3) BP  
163 only, 4) TC only, 5) HbA1c and BP controlled, 6) HbA1c and TC controlled, 7) BP and TC  
164 controlled, or 8) all controlled. Finally, a binary variable examining the proportion of patients  
165 who had all three key parameters controlled. All the outcomes were explored separately for  
166 patients with past or newly recorded diabetes.

## 167 **Covariates**

168 Covariates included a group of sociodemographic and cardiovascular risk factors/history of  
169 CVD that may affect diabetes control.<sup>5,26</sup> Practice data included practice remoteness [major  
170 cities, inner regional, or outer/remote/very remote] and practice Index of Relative  
171 Socioeconomic Advantage and Disadvantage [IRSAD quintiles]. Remoteness and IRSAD  
172 were defined based on postcodes. Remoteness is determined according to the population size  
173 and average distance to services, while IRSAD is an area-level measure of socioeconomic  
174 status based on combined indicators (i.e., household income, education, and working status).  
175 Higher IRSAD scores indicate a more advantaged area.<sup>27</sup> Patient variables included age [18-  
176 39, 40-64, 65+], gender [females, males], smoking status [smoker, ex-smoker or non-smoker],  
177 recorded history of hypertension, and recorded history of CVD [including heart failure,  
178 ischemic heart disease, or stroke] during 2015-2017. Details on the data extraction methods for  
179 these variables have been published elsewhere.<sup>14,28</sup>

## 180 **Statistical Analysis**

181 All analyses were performed in Stata 16.1 (StataCorp, Texas, USA), considering the practices  
182 as clusters, using robust standard errors and conditioned to the number of visits to the practice.

183 The distribution of sociodemographic and clinical characteristics among patients with past or  
184 newly recorded diabetes were presented as proportions with their corresponding 95%  
185 confidence intervals (95%CI) (categorical variables), or as means with their standard deviation  
186 or median with their interquartile range (numerical variables).

187 All results for the monitoring of parameters or achieving recommended targets in 2018 (i.e.  
188 each parameter controlled and all three key parameters controlled) were adjusted for any  
189 unbalance in the distribution of sociodemographic (sex, age, IRSAD, remoteness) or clinical  
190 variables (smoking, history of hypertension or CVD) between the investigated groups.  
191 Therefore, logistic regression models were used to assess differences in diabetes monitoring or  
192 diabetes control (binary outcomes) between patients with past or newly recorded diabetes,  
193 adjusted for differences between these two groups in terms of practice characteristics  
194 (remoteness, IRSAD quintiles), patient sociodemographics (gender, age), or CVD risk factors  
195 (smoking status, history of hypertension or CVD). The same regression models were used to  
196 investigate the association between practice and patient variables with the investigated  
197 outcomes (i.e. monitoring or control of clinical parameters). We reported adjusted odds ratios  
198 (ORs) with their corresponding 95%CI rather than p-values, following recommendations of the  
199 American Statistical Association.<sup>29</sup> Any association between sociodemographic and clinical  
200 characteristics was reported as ORs. Furthermore, results from the adjusted logistic regression  
201 models were also used to estimate adjusted predicted probabilities (i.e. adjusted proportions)  
202 of the investigated outcomes using the command 'margins' in Stata.

203 Multinomial logistic regression models were used to compare whether the most frequent  
204 combination of parameters under control differed between patients with past or newly recorded  
205 diabetes, using a similar approach for adjustment and then obtaining the adjusted ORs and  
206 adjusted probabilities for each category of the outcome.

## 207 Patient and Public Involvement

208 None

## 209 Results

### 210 Population Characteristics

211 Our sample included 111,111 adult patients from 541 practices with recorded diabetes  
212 diagnosis who had at least one annual consultation between 2015-2018 (51.7% males; mean  
213 age  $65.3 \pm 15.0$  years). Of them, 101,875 patients had past recorded diabetes (diabetes recorded  
214 in 2015-2016) and 9,236 had newly recorded diabetes (diabetes recorded in 2017 but not in  
215 previous years) (figure S1 and table S1). Patients with past recorded diabetes were older (mean  
216  $65.9 \pm 14.6$  vs.  $58.1 \pm 17.1$  years), had a higher proportion of males (52.2% vs. 46.3%) or had a  
217 history of CVD (13.8% vs. 12.9%), but hypertension diagnosis was less frequent (36.5% vs.  
218 38.5%) than those with newly recorded diabetes. However, the distribution according to  
219 remoteness, IRSAD, or smoking status was similar in both groups (table S2).

220 <Figure 1>

### 221 Diabetes Monitoring

222 Figure 1 and tables S3 and S4 report the adjusted proportions and corresponding ORs of  
223 patients with past or newly recorded diabetes that had their clinical parameters monitored in  
224 2018. Overall, monitoring of any parameter [i.e., HbA1c, BP, TC, HDL, LDL, triglycerides,

1  
2  
3 225 eGFR or ACR] was more frequent among patients with past than newly recorded diabetes. The  
4  
5 226 most frequently monitored parameter was BP [past diabetes, 84.3% (95%CI 83.3-85.3); recent  
6  
7 227 diabetes, 81.4% (95%CI 80.0-82.8)]. The least monitored parameter was ACR [past diabetes,  
8  
9 228 17.4% (95%CI 16.8-18.0); recent diabetes, 13.5% (95%CI 12.6-14.3)]. Although 45.2% (95%  
10  
11 229 CI 42.6-47.7) of those with past diabetes and 39.4% (95%CI 37.1-41.7) with recent diabetes  
12  
13  
14 230 had their HbA1c levels monitored in 2018, an additional 15% in each group had their glycaemic  
15  
16 231 parameters checked through fasting or random glucose levels (table S3).

17  
18  
19  
20 232 All three key parameters were more frequently monitored among people living in rural or  
21  
22 233 remote areas, attending practices in the lowest IRSAD quintile, or the elderly group (65+years)  
23  
24 234 (table 1). However, there was no difference according to smoking status, or history of CVD,  
25  
26 235 either among patients with past or newly recorded diabetes. Nonetheless, males with recent  
27  
28 236 diabetes were more likely to have all parameters assessed than females (adjusted OR=1.27,  
29  
30 237 95%CI 1.14-1.41), but this difference was not evident among those with past diabetes (adjusted  
31  
32 238 OR=1.09, 95%CI 1.06-1.13). Among patients with recent diabetes, monitoring of all  
33  
34 239 parameters was slightly more frequent among those with a history of hypertension (adjusted  
35  
36 240 OR=1.20, 95%CI 1.07-1.34), but no differences were found among patients with past diabetes  
37  
38 241 (adjusted OR=1.11, 95%CI 1.04-1.19). Table S5 reports the adjusted proportions of these  
39  
40  
41 242 analyses.  
42  
43  
44  
45  
46  
47  
48  
49  
50  
51  
52  
53  
54  
55  
56  
57  
58  
59  
60

**Table 1. Adjusted odds ratio† of patients who had all three parameters (HbA1c, blood pressure, and total cholesterol) monitored, among those with past (2015-2016) or newly recorded diabetes (2017), according to sociodemographic and clinical characteristics**

| <b>All three parameters monitored</b> | <b>Patients monitored among those with past recorded diabetes (n=101,875)<br/>Odds Ratio (95%CI)</b> | <b>Patients monitored among those with newly recorded diabetes (n=9,236)<br/>Odds Ratio (95%CI)</b> |
|---------------------------------------|------------------------------------------------------------------------------------------------------|-----------------------------------------------------------------------------------------------------|
| <b>Practice characteristics</b>       |                                                                                                      |                                                                                                     |
| <b>Geographical area of GP</b>        |                                                                                                      |                                                                                                     |
| Major Cities                          | Ref                                                                                                  | Ref                                                                                                 |
| Inner regional                        | 1.02(0.77-1.35)                                                                                      | 1.08(0.83-1.40)                                                                                     |
| Outer/Remote/Very                     | 1.56(1.15-2.10)                                                                                      | 1.55(1.16-2.09)                                                                                     |
| <b>GP IRSAD quintiles</b>             |                                                                                                      |                                                                                                     |
| Very low                              | Ref                                                                                                  | Ref                                                                                                 |
| Low                                   | 0.73(0.52-1.03)                                                                                      | 0.70(0.50-0.97)                                                                                     |
| Middle                                | 0.83(0.58-1.17)                                                                                      | 0.68(0.49-0.94)                                                                                     |
| High                                  | 0.84(0.59-1.20)                                                                                      | 0.81(0.57-1.17)                                                                                     |
| Very High                             | 0.72(0.51-1.04)                                                                                      | 0.77(0.54-1.10)                                                                                     |
| <b>Patient's characteristics</b>      |                                                                                                      |                                                                                                     |
| <b>Gender</b>                         |                                                                                                      |                                                                                                     |
| Female                                | Ref                                                                                                  | Ref                                                                                                 |
| Male                                  | 1.09(1.06-1.13)                                                                                      | 1.27(1.14-1.41)                                                                                     |
| <b>Age group (years)</b>              |                                                                                                      |                                                                                                     |
| 18-39                                 | Ref                                                                                                  | Ref                                                                                                 |
| 40-64                                 | 2.80(2.57-3.04)                                                                                      | 3.23(2.66-3.91)                                                                                     |
| 65+                                   | 3.12(2.82-3.45)                                                                                      | 3.97(3.23-4.88)                                                                                     |
| <b>Smoking status</b>                 |                                                                                                      |                                                                                                     |
| Non-smoker or ex-smoker               | Ref                                                                                                  | Ref                                                                                                 |
| Smoker                                | 0.90(0.86-0.95)                                                                                      | 0.96(0.82-1.12)                                                                                     |
| <b>History of hypertension</b>        |                                                                                                      |                                                                                                     |
| No                                    | Ref                                                                                                  | Ref                                                                                                 |
| Yes                                   | 1.11(1.04-1.19)                                                                                      | 1.20(1.07-1.34)                                                                                     |
| <b>History of CVD</b>                 |                                                                                                      |                                                                                                     |
| No                                    | Ref                                                                                                  | Ref                                                                                                 |
| Yes                                   | 0.95(0.90-1.00)                                                                                      | 0.98(0.84-1.13)                                                                                     |

† Adjusted odds ratio of patients had all three parameters (HbA1c, blood pressure, and total cholesterol) monitored based on logistic regression models that considered differences among patients with past or newly recorded diabetes in terms of practice characteristics (remoteness, IRSAD quintiles), patient sociodemographics (gender, age), and CVD risk factors (smoking status, history of hypertension or CVD). The adjusted proportions of these analyses are reported in table S5.

GP: general practice; Ref: reference group; 95%CI: 95% confidence interval; IRSAD: Index of Relative Socioeconomic Advantage and Disadvantage; CVD: Cardiovascular diseases including heart failure, ischemic heart disease, and stroke.

## 257 **Well-controlled Diabetes**

258 Table 2 shows the adjusted proportion of patients that achieved clinical goals for diabetes  
259 management in 2018 among those with available results for each of the three key parameters  
260 (i.e. adjusted for sex, age or other differences between those with past or newly recorded  
261 diabetes). Patients with recent diabetes were 44% more likely to have their HbA1c controlled  
262 (78.5%) than those with past diabetes (54.4%). Nevertheless, TC control was 31% more  
263 frequent among those with past (43.9%) than recent diabetes (33.6%). Systolic-BP control was  
264 not different across both groups, but diastolic-BP control was slightly higher among those with  
265 past than recent diabetes. The corresponding adjusted ORs are reported in table S6.  
266 Furthermore, table S7 shows the proportion of patients with normal kidney function (i.e., eGFR  
267 and/or ACR) among those monitored in 2018. Patients with recent diabetes were more likely  
268 to have normal kidney function parameters than patients with past diabetes (eGFR: 85.6% vs.  
269 78.0%; ACR: 75.2% vs. 67.9%, respectively).

270



271 **Table 2. Adjusted proportion<sup>†</sup> of patients with controlled clinical goals in 2018 for diabetes management among those with available results**  
 272 **for the three key parameters (HbA1c, blood pressure, and total cholesterol)**

| Clinical parameters                              | Past recorded diabetes (2015-2016)<br>n=40,008 |                 | Newly recorded diabetes (2017)<br>n=2,912 |                 |
|--------------------------------------------------|------------------------------------------------|-----------------|-------------------------------------------|-----------------|
|                                                  | % (95%CI)                                      | Crude mean ± SD | % (95%CI)                                 | Crude mean ± SD |
| <b>HbA1c controlled (≤7.0% or ≤53 mmol/mol)</b>  |                                                |                 |                                           |                 |
| <b>No</b>                                        | 45.6 (44.6-46.6)                               | 8.2 ± 1.1       | 21.5 (19.9-23.2)                          | 8.2 ± 1.2       |
| <b>Yes</b>                                       | 54.4 (53.4-55.4)                               | 6.3 ± 0.5       | 78.5 (76.8-80.1)                          | 6.1 ± 0.5       |
| <b>Blood pressure controlled</b>                 |                                                |                 |                                           |                 |
| <b>Systolic (≤140mmHg)</b>                       |                                                |                 |                                           |                 |
| <b>No</b>                                        | 29.5 (28.4-30.5)                               | 150.8 ± 9.2     | 28.4 (26.6-30.2)                          | 150.5 ± 9.0     |
| <b>Yes</b>                                       | 70.5 (69.5-71.6)                               | 127.3 ± 9.2     | 71.6 (69.8-73.4)                          | 127.2 ± 9.4     |
| <b>Diastolic (≤90mmHg)</b>                       |                                                |                 |                                           |                 |
| <b>No</b>                                        | 5.4 (5.1-5.8)                                  | 95.4 ± 4.8      | 7.3 (6.4-8.1)                             | 95.3 ± 4.5      |
| <b>Yes</b>                                       | 94.6 (94.2-94.9)                               | 74.7 ± 8.3      | 92.7 (91.9-93.6)                          | 76.9 ± 7.8      |
| <b>Total cholesterol controlled (≤4.0mmol/L)</b> |                                                |                 |                                           |                 |
| <b>No</b>                                        | 56.1 (55.1-57.0)                               | 5.0 ± 0.9       | 66.4 (64.5-68.2)                          | 5.1 ± 0.8       |
| <b>Yes</b>                                       | 43.9 (43.0-44.9)                               | 3.4 ± 0.4       | 33.6 (31.8-35.5)                          | 3.4 ± 0.4       |

273

274 † Adjusted proportions of patients who had each clinical parameter controlled based on logistic regression models adjusted for (remoteness, IRSAD quintiles),  
 275 patient sociodemographics (gender, age), and CVD risk factors (smoking status, history of hypertension or CVD). The adjusted odds ratios of these analyses  
 276 are reported in table S7.

277 95%CI: 95% confidence interval; SD: Standard deviation; HbA1c: Glycated haemoglobin.

Table 3 shows the combination of the three key parameters that were more frequently controlled in 2018. The proportion of patients with diabetes that met the three recommended targets was similar whether they had past (17.4%, 95%CI 16.7-18.1) or newly recorded diabetes (18.8%, 95%CI 17.2-20.3). Nonetheless, the proportion of patients with none of these parameters under control was lower among those with newly (5.1%, 95%CI 4.3-5.9) than past recorded diabetes (8.8%, 95%CI 8.3-9.4). Moreover, patients with newly recorded diabetes were more likely to have their HbA1c controlled, either alone (16.8%) or in combination with a second clinical parameter (35.6% with BP and 7.2% with TC; 42.8% combined) than those with past diabetes (9.9% for HbA1c alone and 27.1% combined with a second parameter). Table S8 reports the corresponding adjusted ORs for the combination of parameters.

**Table 3. Adjusted proportion<sup>†</sup> of the combination of clinical parameters controlled in 2018 among patients with past (2015-2016) or newly recorded diabetes (2017) and available results for all three parameters (HbA1c, blood pressure, and total cholesterol)**

|                                        | Past recorded diabetes<br>(n= 40,008) |                  | Newly recorded diabetes<br>(n= 2,912) |                  |
|----------------------------------------|---------------------------------------|------------------|---------------------------------------|------------------|
|                                        | n                                     | % (95%CI)        | N                                     | % (95%CI)        |
| None controlled                        | 3,521                                 | 8.8 (8.3-9.4)    | 148                                   | 5.1 (4.3-5.9)    |
| Only HbA1c controlled                  | 3,961                                 | 9.9 (9.4-10.4)   | 489                                   | 16.8 (15.4-18.3) |
| Only BP controlled                     | 6,761                                 | 16.9 (16.3-17.5) | 259                                   | 8.9 (7.9-9.9)    |
| Only total cholesterol controlled      | 2,360                                 | 5.9 (5.5-6.2)    | 61                                    | 2.1 (1.6-2.5)    |
| HbA1c and BP controlled                | 8,202                                 | 20.5 (19.8-21.1) | 1,036                                 | 35.6 (33.7-37.5) |
| HbA1c and total cholesterol controlled | 2,641                                 | 6.6 (6.2-7.0)    | 209                                   | 7.2 (6.1-8.3)    |
| BP and total cholesterol controlled    | 5,601                                 | 14.0 (13.6-14.5) | 163                                   | 5.6 (4.6-6.5)    |
| All controlled                         | 6,961                                 | 17.4 (16.7-18.1) | 547                                   | 18.8 (17.2-20.3) |

<sup>†</sup> Adjusted proportion of the most frequent combination of clinical parameters controlled in 2018 based on multinomial logistic regression models adjusted for (remoteness, IRSAD quintiles), patient sociodemographics (gender, age), and CVD risk factors (smoking status, history of hypertension or CVD). The adjusted odds ratios of these analyses are reported in table S8.

95%CI: 95% confidence interval; HbA1c: Glycated haemoglobin; BP: blood pressure.

1  
2  
3 298 Table 4 explores whether having all three key parameters controlled (“all-controlled”) was  
4  
5 299 different by sociodemographic or clinical variables. The frequency of ‘all-controlled’ diabetes  
6  
7 300 increased with age. Males were more likely to be ‘all-controlled’ than females, whether they  
8  
9 301 had past (adjusted OR=1.50, 95%CI 1.41-1.58) or newly recorded diabetes (adjusted OR=1.76,  
10  
11 302 95%CI 1.44-2.16). Patients with a history of CVD were more likely to be ‘all-controlled’,  
12  
13  
14 303 especially among those with newly (adjusted OR=2.43, 95%CI 1.85-3.19) than past recorded  
15  
16 304 diabetes (adjusted OR=1.39, 95%CI 1.30-1.49). However, the distribution of ‘all-controlled’  
17  
18 305 diabetes did not differ according to practice remoteness, IRSAD, patient smoking status or  
19  
20  
21 306 history of hypertension. Tables S9-S11 present the relationship between sociodemographic and  
22  
23 307 clinical characteristics and the control of each separated parameter. Table S12 and S13 report  
24  
25 308 the adjusted proportions of the ‘all-controlled’ and ‘none-controlled’ outcome, respectively.  
26  
27  
28  
29 309

**Table 4. Adjusted odds ratio<sup>†</sup> of distribution of patients with all three clinical parameters controlled according to sociodemographic and clinical characteristics among those with past (2015-2016) or newly recorded diabetes (2017)**

| Variables                        | 'All-controlled' among past recorded diabetes (n=40,008) % (95%CI) | 'All-controlled' among newly recorded diabetes (n=2,912) % (95%CI) |
|----------------------------------|--------------------------------------------------------------------|--------------------------------------------------------------------|
|                                  | Odds Ratio (95%CI)                                                 | Odds Ratio (95%CI)                                                 |
| <b>Practice characteristics</b>  |                                                                    |                                                                    |
| <b>Geographical area of GP</b>   |                                                                    |                                                                    |
| Major Cities                     | Ref                                                                | Ref                                                                |
| Inner regional                   | 1.05(0.93-1.20)                                                    | 1.11(0.85-1.44)                                                    |
| Outer/Remote/Very Remote         | 0.94(0.80-1.10)                                                    | 0.91(0.67-1.24)                                                    |
| <b>GP IRSAD Quintiles</b>        |                                                                    |                                                                    |
| Very low                         | Ref                                                                | Ref                                                                |
| Low                              | 1.02(0.89-1.16)                                                    | 0.87(0.63-1.22)                                                    |
| Middle                           | 1.00(0.86-1.18)                                                    | 1.02(0.75-1.38)                                                    |
| High                             | 0.96(0.81-1.13)                                                    | 0.80(0.56-1.15)                                                    |
| Very High                        | 1.03(0.89-1.20)                                                    | 0.74(0.52-1.04)                                                    |
| <b>Patient's characteristics</b> |                                                                    |                                                                    |
| <b>Gender</b>                    |                                                                    |                                                                    |
| Female                           | Ref                                                                | Ref                                                                |
| Male                             | 1.50(1.41-1.58)                                                    | 1.76(1.44-2.16)                                                    |
| <b>Age group (years)</b>         |                                                                    |                                                                    |
| 18-39                            | Ref                                                                | Ref                                                                |
| 40-64                            | 1.78(1.38-2.30)                                                    | 1.24(0.75-2.04)                                                    |
| 65+                              | 3.31(2.58-4.24)                                                    | 2.09(1.26-3.47)                                                    |
| <b>Smoking status</b>            |                                                                    |                                                                    |
| Non-smoker or ex-smoker          | Ref                                                                | Ref                                                                |
| Smoker                           | 0.91(0.83-1.00)                                                    | 1.11(0.85-1.46)                                                    |
| <b>History of hypertension</b>   |                                                                    |                                                                    |
| No                               | Ref                                                                | Ref                                                                |
| Yes                              | 0.91(0.85-0.96)                                                    | 1.02(0.84-1.23)                                                    |
| <b>History of CVD</b>            |                                                                    |                                                                    |
| No                               | Ref                                                                | Ref                                                                |
| Yes                              | 1.39(1.30-1.49)                                                    | 2.43(1.85-3.19)                                                    |

<sup>†</sup> 'All-controlled' are those patients with HbA1c $\leq$ 7.0%, BP $\leq$ 140/90mmHg, and total cholesterol  $\leq$ 4.0mmol/L. Adjusted odds ratio of patients who had each clinical parameter controlled based on logistic regression models adjusted for (remoteness, IRSAD quintiles), patient sociodemographics (gender, age), and CVD risk factors (smoking status, history of hypertension or CVD). The adjusted proportions of these analyses are reported in table S12.

GP: general practice; Ref: reference group; 95%CI: 95% confidence interval; IRSAD: Index of Relative Socioeconomic Advantage and Disadvantage; CVD: Cardiovascular diseases including heart failure, ischemic heart disease, and stroke.

## Discussion

This paper highlighted five main findings. Less than half of patients with diabetes had their HbA1c levels assessed over 12 months, and the frequency of monitoring of that or other clinical parameters was less frequent among patients with newly than past recorded diabetes. Second, monitoring of HbA1c, BP, and cholesterol was not more frequent among smokers, patients with hypertension or a history of CVD. Third, although they were less likely to be tested, eight out of ten patients with newly recorded diabetes achieved HbA1c control. Fourth, less than 20% of patients with diabetes who were monitored in 2018 had their HbA1c, BP and TC within targeted levels considered 'well-controlled'. Finally, patients with history of CVD were more likely to be 'well-controlled' than those without CVD, especially among those with newly recorded diabetes.

Current Australian guidelines recommend annual monitoring of clinical parameters for all patients with diabetes.<sup>7</sup> Nonetheless, we found 45.2% of those with past diabetes and 39.4% of those with newly recorded diabetes had their HbA1c levels monitored in 2018. The HbA1c records in the EMRs may be partly underestimated as some patients may be referred to diabetes specialists once they are confirmed to have diabetes, although this may represent a small proportion, as management plans are expected to be reviewed regularly by GPs.<sup>7</sup> Our results are consistent with the 'Rule of Halves' discussed in an Australian review, showing that half of patients with diabetes receive appropriate diabetes care/monitoring, and half of those receiving care achieve management goals.<sup>11</sup> Another recent Australian retrospective study not included in that review and using EMRs from patients attending 50 practices in the inner eastern region of Melbourne (MAGNET database, period 2009-2014) found 66.5% of patients (65+years) with T2D had their HbA1c checked within the last two years. Among those monitored, 42.4% achieved HbA1c control (i.e. levels  $\leq 7.0\%$  in the most recent laboratory result).<sup>30</sup> Our findings are also consistent with evidence from the AHS (2011-2012), which

1  
2  
3 348 reported that 54.7% of adults with known diabetes achieved HbA1c levels  $\leq 7.0\%$  (i.e. 54.4%  
4  
5 349 among patients with past recorded diabetes in our study).<sup>12</sup>  
6

7 350 Among other clinical parameters, BP was the most frequently monitored. This observed  
8  
9 351 prevalence did not differ from a population-based study in South Australia that showed 81.8%  
10  
11 352 of individuals without diabetes, hypertension or CVD had their BP measured by a GP in the  
12  
13 353 last 12 months.<sup>31</sup> It was concerning that only one in four patients with diabetes had reported  
14  
15 354 results on their kidney function in the last 12 months, even among those with past recorded  
16  
17 355 diabetes. Diabetes and hypertension are the most important causes of CKD, and annual kidney  
18  
19 356 health checks (eGFR and urine ACR) are strongly recommended for these patients.<sup>32</sup>  
20  
21  
22  
23

24 357 It is also concerning that a history of smoking, hypertension and CVD did not affect the  
25  
26 358 monitoring of the three investigated parameters because they contribute to absolute CVD risk  
27  
28 359 and diabetes-related co-morbidities.<sup>3</sup> A British EMR-based study indicated that despite optimal  
29  
30 360 control of different CVD risk factors (i.e., HbA1c, systolic-BP, TC, triglycerides, smoking),  
31  
32 361 patients with diabetes still had a 21% higher CVD risk than those without diabetes, reinforcing  
33  
34 362 the need to monitor and control these parameters.<sup>33</sup>  
35  
36  
37

38 363 Although patients with newly recorded diabetes were less likely to have their HbA1c monitored,  
39  
40 364 eight out of ten of those monitored achieved HbA1c control. Patients with newly recorded  
41  
42 365 diabetes were, on average, eight years younger than those with past diabetes, which suggests  
43  
44 366 their condition was at an earlier stage when complications are less frequent and diabetes control  
45  
46 367 is more likely to be achieved with first-line medications.<sup>2,3</sup> Additionally, medication adherence  
47  
48 368 among patients with newly diagnosed diabetes can be as high as 65% then reducing over time,  
49  
50 369 which, in turn, has been found to impact diabetes control.<sup>34</sup> Nonetheless, the possibility of  
51  
52 370 information bias introduced by the less frequent HbA1c monitoring among those with newly  
53  
54 371 recorded diabetes cannot be discounted as an alternative explanation.  
55  
56  
57  
58  
59  
60

1  
2  
3 372 Another finding that corroborates results from the AHS (2011-2012)<sup>12</sup> is how the proportion  
4  
5 373 of patients with well-controlled diabetes increases with age. Older patients were more likely to  
6  
7 374 achieve diabetes control than younger patients, even among those with newly recorded diabetes.  
8  
9 375 This could be explained by the fact that older patients visit their GP more frequently, allowing  
10  
11 376 more opportunities to have disease management monitored. However, a previous study using  
12  
13 377 the MedicineInsight database showed that despite greater regularity and continuity of care  
14  
15 378 being associated with an increased likelihood of HbA1c monitoring, it did not influence HbA1c  
16  
17 379 control among patients with diabetes.<sup>35</sup>

20  
21 380 Our results for the proportion of patients with controlled BP or TC were higher than findings  
22  
23 381 from the review of Australian studies (2020), but comparable for HbA1c control. Overall, that  
24  
25 382 review reported that 52%, 42%, and 15% of patients met treatment targets for HbA1c, BP and  
26  
27 383 TC, respectively.<sup>11</sup> The use of different cut-off points for BP could explain the discrepancies  
28  
29 384 for that parameter, as the criteria used in the review were lower ( $\leq 130/80$ mmHg)<sup>11</sup> than ours  
30  
31 385 ( $\leq 140/90$ mmHg), which was based on the existing Australian guideline during the investigated  
32  
33 386 period (2016-2018). Furthermore, many of the studies in that review analysed data sourced  
34  
35 387 from specialist centres instead of general practices or included non-representative samples,  
36  
37 388 which reduces comparability with our results.

38  
39  
40  
41  
42  
43 389 Among those monitored, only one in five achieved targeted goals for the three key parameters.  
44  
45 390 Unexpectedly, the proportion of those 'well-controlled' was higher in men. According to the  
46  
47 391 literature, males are less likely to use health services, have less knowledge on the risk factors  
48  
49 392 for diabetes/CVD or diabetes-related complications, are less adherent to lifestyle  
50  
51 393 recommendations and chronic conditions tend to be diagnosed at a more advanced stage than  
52  
53 394 women.<sup>36-38</sup> However, although men exhibit greater clinical risk overall, the risk substantially  
54  
55 395 increases among women in middle-adulthood when diabetes is more likely to be diagnosed.<sup>37</sup>  
56  
57 396 Additional results (table S11) show the parameter responsible for this finding was TC control,  
58  
59  
60

1  
2  
3 397 which was 44-68% more frequent among men, while the other two parameters were slightly  
4  
5 398 more frequent in women.

6  
7 399 Our study also found that patients with a history of CVD were more likely to achieve ‘well-  
8  
9 400 controlled’ parameters, especially when they had recent diabetes diagnoses. This finding might  
10  
11 401 be related to the co-administration of antihypertensive and lipid-lowering therapy among  
12  
13 402 patients with a history of CVD to reduce the risk of new CVD events.<sup>39</sup> Discrepancies between  
14  
15 403 patients with past or recent diabetes diagnosis could result from incidence-prevalence bias, and  
16  
17 404 prospective studies would be necessary to elucidate these findings.

18  
19  
20  
21 405 The study has significant strengths, such as the use of a large sample of patients attending  
22  
23 406 primary healthcare services across all Australian states and territories. Furthermore, we  
24  
25 407 explored socioeconomic and clinical variables related to diabetes monitoring and control that  
26  
27 408 were not included in the most recent Australian studies on the same topic. Nonetheless, some  
28  
29 409 other relevant covariates (e.g., diet and exercise) were not explored, as they are not consistently  
30  
31 410 recorded in the EMRs, or are recorded in the progress notes which cannot be extracted because  
32  
33 411 of confidentiality issues. This is a common limitation of EMR-based studies, as data from  
34  
35 412 progress notes may affect completeness of information used for analysis. Additionally, patients  
36  
37 413 may have had their diabetes parameters monitored somewhere else (e.g., different practices or  
38  
39 414 specialists). To minimize it, we used different fields to identify laboratory results that were not  
40  
41 415 requested and automatically reported to the practice by the laboratories. Despite using widely  
42  
43 416 accepted target levels for the clinical parameters investigated, they may be adjusted and tailored  
44  
45 417 to individual characteristics, which may not be feasible to differentiate in large epidemiological  
46  
47 418 studies. Finally, prevalence-incidence bias may have affected some of the investigated  
48  
49 419 associations (e.g., history of CVD and hypertension) among patients with past or newly  
50  
51 420 recorded diabetes.



## 421 **Conclusions**

422 In Australia, monitoring and achieving clinical targets for diabetes management appears to be  
423 suboptimal. Consistent with previous research, we found half of the patients with diabetes had  
424 a record of their glycaemic levels being checked over 12 months. However, the recording of  
425 other laboratory parameters was less frequent, and only 25% of them had an eGFR or ACR  
426 recorded in the previous 12 months. Moreover, 80% of all those monitored did not achieve  
427 HbA1c, BP, and TC targets recommended by the guideline, regardless of the time of diabetes  
428 diagnosis. Multi-component interventions for early detection and management of risk factors  
429 and complications, intensive glycaemic control in persons with newly diagnosed diabetes,  
430 statin therapy for secondary CVD prevention, and intensive hypertension control with  
431 angiotensin-converting enzyme inhibitors or angiotensin receptor blockers to prevent end-stage  
432 renal disease are some of the cost-effective strategies highlighted in the literature that could be  
433 incorporated and emphasized in standard diabetes care programs.<sup>40,41</sup> Further studies are  
434 necessary to examine whether systematic implementation of these strategies in Australian  
435 primary health settings can optimize diabetes management in line with guidelines.

## 436 **Acknowledgements**

437 We are grateful to the general practices that participate in MedicineInsight, and the patients  
438 who allow the use of their de-identified information. We also thank all colleagues at the  
439 Discipline of General Practice, especially Dr Jessica Edwards and Dr Mumtaz Begum.

## 440 **Data Availability Statement**

441 Data used in this study was obtained from a third party (MedicineInsight) for this specific  
442 project and cannot be released. Information about MedicineInsight data and how they can be  
443 accessed is available on the website (<https://www.nps.org.au/medicine-insight>). The data

1  
2  
3 444 extraction algorithms used in this study are available from the corresponding author upon  
4  
5 445 request.  
6  
7

#### 8 446 **Contributors**

9

10 447 Conceptualization: MZ DGC

11  
12  
13  
14 448 Data extraction: MZ COB

15  
16  
17 449 Formal analysis: MZ

18  
19  
20 450 Methodology: MZ DGC COB

21  
22  
23 451 Resources: DGC NS

24  
25  
26 452 Supervision: DGC COB NS

27  
28  
29 453 Writing-original draft: MZ

30  
31  
32 454 Writing-review & editing: MZ DGC COB NS PH

#### 33 34 455 **Competing Interests**

35  
36  
37 456 The authors declare no conflict of interest.  
38  
39

#### 40 41 457 **Funding Resources**

42  
43 458 MZ received a PhD Scholarship from the University of Adelaide for this study. Research did  
44  
45 459 not receive any specific grant from funding agencies in the public, commercial, or not-for-  
46  
47 460 profit sectors.  
48  
49

#### 50 51 461 **Patient and Public Involvement**

52  
53  
54 462 It was not appropriate or possible to involve patients or the public in the design, or conduct, or  
55  
56 463 reporting, or dissemination plans of our research.  
57  
58

#### 59 464 **Ethics Approval Statement**

60

1  
2  
3 465 The independent MedicineInsight Data Governance Committee approved the study (protocol  
4  
5 466 2016-007). The Human Research Ethics Committee of the University of Adelaide exempted  
6  
7 467 the study from an ethical review as it used de-identified data.  
8  
9

10 468

## 11 12 13 469 **References**

- 14  
15 470 **1.** Lambrinou E, Hansen TB, Beulens JW. Lifestyle factors, self-management and patient  
16  
17 471 empowerment in diabetes care. *Eur J Prev Cardiol.* 2019;26:55-63.
- 18  
19 472 **2.** Holman RR, Paul SK, Bethel MA, Matthews DR, Neil HAW. 10-year follow-up of  
20  
21 473 intensive glucose control in type 2 diabetes. *New Engl J Med.* 2008;359(15):1577-  
22  
23 474 1589.
- 24  
25 475 **3.** Aschner P. New IDF clinical practice recommendations for managing type 2 diabetes  
26  
27 476 in primary care. *Diabetes Res Clin Pract.* 2017;132:169-170.
- 28  
29 477 **4.** Li MZ, Ji LN, Meng ZL, et al. Management status of type 2 diabetes mellitus in tertiary  
30  
31 478 hospitals in Beijing: gap between guideline and reality. *Chin Med J (Engl).*  
32  
33 479 2012;125(23):4185-4189.
- 34  
35 480 **5.** Nazarzadeh M, Bidel Z, Canoy D, et al. Blood pressure lowering and risk of new-onset  
36  
37 481 type 2 diabetes: an individual participant data meta-analysis. *Lancet.*  
38  
39 482 2021;398(10313):1803-1810.
- 40  
41 483 **6.** Lin X, Xu Y, Pan X, et al. Global, regional, and national burden and trend of diabetes  
42  
43 484 in 195 countries and territories: an analysis from 1990 to 2025. *Sci Rep.*  
44  
45 485 2020;10(1):14790.
- 46  
47 486 **7.** RACGP. The Royal Australian College of General Practitioners. General practice  
48  
49 487 management of type 2 diabetes: 2016–18. East Melbourne, Vic 2016.  
50  
51  
52  
53  
54  
55  
56  
57  
58  
59  
60

- 1  
2  
3 488 **8.** American Diabetes Association Professional Practice Committee, Draznin B, Aroda  
4  
5 489 VR, et al. 9. Pharmacologic Approaches to Glycemic Treatment: Standards of Medical  
6  
7 490 Care in Diabetes-2022. *Diabetes Care*. 2022;45(Suppl 1):S125-S143.
- 8  
9 491 **9.** Mehta S, Mocarski M, Wisniewski T, Gillespie K, Narayan KMV, Lang K. Primary  
10  
11 492 care physicians' utilization of type 2 diabetes screening guidelines and referrals to  
12  
13 493 behavioral interventions: a survey-linked retrospective study. *BMJ Open Diabetes Res*  
14  
15 494 *Care*. 2017;5(1):e000406.
- 16  
17 495 **10.** Guthrie B, Emslie-Smith A, Morris AD. Which people with Type 2 diabetes achieve  
18  
19 496 good control of intermediate outcomes? Population database study in a U.K. region.  
20  
21 497 *Diabetic Med*. 2009;26(12):1269-1276.
- 22  
23 498 **11.** Sainsbury E, Shi YM, Flack J, Colagiuri S. The diagnosis and management of diabetes  
24  
25 499 in Australia: Does the "Rule of Halves" apply? *Diabetes Res Clin Pr*. 2020;170.
- 26  
27 500 **12.** ABS. Australian Health Survey: Biomedical Results for Chronic Diseases. 2013.  
28  
29 501 Accessed 02 January 2022.
- 30  
31 502 **13.** Henderson J, Barnett S, Ghosh A, et al. Validation of electronic medical data:  
32  
33 503 Identifying diabetes prevalence in general practice. *Health Inf Manag J*. 2019;48(1):3-  
34  
35 504 11.
- 36  
37 505 **14.** Havard A, Manski-Nankervis JA, Thistlethwaite J, et al. Validity of algorithms for  
38  
39 506 identifying five chronic conditions in MedicineInsight, an Australian national general  
40  
41 507 practice database. *Bmc Health Serv Res*. 2021;21(1).
- 42  
43 508 **15.** Zheng M, Bernardo CDO, Stocks N, Gonzalez-Chica D. Diabetes Mellitus Diagnosis  
44  
45 509 and Screening in Australian General Practice: A National Study. *Journal of Diabetes*  
46  
47 510 *Research*. 2022;2022.
- 48  
49 511 **16.** Varroud-Vial M. Improving diabetes management with electronic medical records.  
50  
51 512 *Diabetes Metab*. 2011;37:S48-S52.
- 52  
53  
54  
55  
56  
57  
58  
59  
60

- 1  
2  
3 513 **17.** Pulleyblank R, Mellace G, Olsen KR. Evaluation of an Electronic Health Record  
4  
5 514 System With a Disease Management Program and Health Care Treatment Costs for  
6  
7 515 Danish Patients With Type 2 Diabetes. *JAMA Netw Open*. 2020;3(5):e206603.  
8  
9  
10 516 **18.** Shah S, Yeheskel A, Hossain A, et al. The Impact of Guideline Integration into  
11  
12 517 Electronic Medical Records on Outcomes for Patients with Diabetes: A Systematic  
13  
14 518 Review. *Am J Med*. 2021;134(8):952-+.
- 15  
16 519 **19.** Busingye D, Gianacas C, Pollack A, et al. Data Resource Profile: MedicineInsight, an  
17  
18 520 Australian national primary health care database. *Int J Epidemiol*. 2019;48(6):1741-  
19  
20 521 1741h.
- 21  
22  
23 522 **20.** Benchimol EI, Smeeth L, Guttman A, et al. The REporting of studies Conducted using  
24  
25 523 Observational Routinely-collected health Data (RECORD) Statement. *Plos Med*.  
26  
27 524 2015;12(10).
- 28  
29  
30 525 **21.** Anderson AE, Kerr WT, Thames A, Li T, Xiao JY, Cohen MS. Electronic health record  
31  
32 526 phenotyping improves detection and screening of type 2 diabetes in the general United  
33  
34 527 States population: A cross-sectional, unselected, retrospective study. *J Biomed Inform*.  
35  
36 528 2016;60:162-168.
- 37  
38  
39 529 **22.** Flory JH, Roy J, Gagne JJ, et al. Missing laboratory results data in electronic health  
40  
41 530 databases: implications for monitoring diabetes risk. *J Comp Effect Res*. 2017;6(1):25-  
42  
43 531 32.
- 44  
45  
46 532 **23.** Nishioka Y, Takeshita S, Kubo S, et al. Appropriate definition of diabetes using an  
47  
48 533 administrative database: A cross-sectional cohort validation study. *J Diabetes Invest*.  
49  
50 534 2022;13(2):249-255.
- 51  
52  
53 535 **24.** PBS. Drugs used in diabetes. A10 - Drugs used in diabetes 2021. Accessed 02 January  
54  
55 536 2022.  
56  
57  
58  
59  
60

- 1  
2  
3 537 **25.** Stram M, Gigliotti T, Hartman D, et al. Logical Observation Identifiers Names and  
4  
5 538 Codes for Laboratorians Potential Solutions and Challenges for Interoperability. Arch  
6  
7 539 Pathol Lab Med. 2020;144(2):229-239.
- 8  
9 540 **26.** Sharma A, Mittal S, Aggarwal R, Chauhan MK. Diabetes and cardiovascular disease:  
10  
11 541 inter-relation of risk factors and treatment. Futur J Pharm Sci. 2020;6(1).
- 12  
13  
14 542 **27.** ABS. Census of Population and Housing: Socio-Economic Indexes for Areas (SEIFA),  
15  
16 543 Australia, 2016. IRSAD 2018. Accessed 27 January 2022.
- 17  
18 544 **28.** Roseleur J, Gonzalez-Chica DA, Bernardo CO, Geisler BP, Karnon J, Stocks NP. Blood  
19  
20 545 pressure control in Australian general practice: analysis using general practice records  
21  
22 546 of 1.2 million patients from the MedicineInsight database. J Hypertens.  
23  
24 547 2021;39(6):1134-1142.
- 25  
26 548 **29.** Wasserstein RL, Lazar NA. The ASA's Statement on p-Values: Context, Process, and  
27  
28 549 Purpose. Am Stat. 2016;70(2):129-131.
- 29  
30 550 **30.** Xia T, Turner L, Enticott J, Mazza D, Schattner P. Glycaemic control of Type 2 diabetes  
31  
32 551 in older patients visiting general practitioners: An examination of electronic medical  
33  
34 552 records to identify risk factors for poor control. Diabetes Res Clin Pr. 2019;153:125-  
35  
36 553 132.
- 37  
38 554 **31.** Gonzalez-Chica DA, Bowden J, Miller C, et al. Patient-reported GP health assessments  
39  
40 555 rather than individual cardiovascular risk burden are associated with the engagement in  
41  
42 556 lifestyle changes: population-based survey in South Australia. BMC Fam Pract.  
43  
44 557 2019;20(1).
- 45  
46 558 **32.** Kidney Health Australia. Chronic Kidney Disease (CKD) Management in Primary  
47  
48 559 Care. [https://kidney.org.au/uploads/resources/CKD-Management-in-Primary-](https://kidney.org.au/uploads/resources/CKD-Management-in-Primary-Care_handbook_2020.1.pdf)  
49  
50 560 [Care\\_handbook\\_2020.1.pdf](https://kidney.org.au/uploads/resources/CKD-Management-in-Primary-Care_handbook_2020.1.pdf) 2020.

- 1  
2  
3 561 **33.** Wright AK, Suarez-Ortegon MF, Read SH, et al. Risk Factor Control and  
4  
5 562 Cardiovascular Event Risk in People With Type 2 Diabetes in Primary and Secondary  
6  
7 563 Prevention Settings. *Circulation*. 2020;142(20):1925-1936.  
8  
9 564 **34.** Lin LK, Sun Y, Heng BH, Chew DEK, Chong PN. Medication adherence and glycemic  
10  
11 565 control among newly diagnosed diabetes patients. *Bmj Open Diab Res Ca*. 2017;5(1).  
12  
13  
14 566 **35.** Youens D, Robinson S, Doust J, Harris MN, Moorin R. Associations between regular  
15  
16 567 G.P. contact, diabetes monitoring and glucose control: an observational study using  
17  
18 568 general practice data. *Bmj Open*. 2021;11(11).  
19  
20  
21 569 **36.** Kilkenny MF, Dunstan L, Busingye D, et al. Knowledge of risk factors for diabetes or  
22  
23 570 cardiovascular disease (CVD) is poor among individuals with risk factors for CVD.  
24  
25 571 *Plos One*. 2017;12(2).  
26  
27  
28 572 **37.** Dash SR, Hoare E, Varsamis P, Jennings GLR, Kingwell BA. Sex-Specific Lifestyle  
29  
30 573 and Biomedical Risk Factors for Chronic Disease among Early-Middle, Middle and  
31  
32 574 Older Aged Australian Adults. *Int J Env Res Pub He*. 2019;16(2).  
33  
34  
35 575 **38.** Kramer HU, Raum E, Ruter G, et al. Gender disparities in diabetes and coronary heart  
36  
37 576 disease medication among patients with type 2 diabetes: results from the DIANA study.  
38  
39 577 *Cardiovasc Diabetol*. 2012;11.  
40  
41  
42 578 **39.** Baker Heart and Diabetes Institute. National Evidence-Based Guideline on Secondary  
43  
44 579 Prevention of Cardiovascular Disease in Type 2 Diabetes (Part of the Guidelines on  
45  
46 580 Management of Type 2 Diabetes). Melbourne Australia 2015.  
47  
48  
49 581 **40.** Li R, Zhang P, Barker LE, Chowdhury FM, Zhang XP. Cost-Effectiveness of  
50  
51 582 Interventions to Prevent and Control Diabetes Mellitus: A Systematic Review. *Diabetes*  
52  
53 583 *Care*. 2010;33(8):1872-1894.  
54  
55  
56 584 **41.** Siegel KR, Ali MK, Zhou XL, et al. Cost-effectiveness of Interventions to Manage  
57  
58 585 Diabetes: Has the Evidence Changed Since 2008? *Diabetes Care*. 2020;43(7):1557-  
59  
60 586 1592.

1  
2  
3 5874  
5  
6 588 **Supplemental material**7  
8  
9 589 Figure S1. Flowchart of the identification of 'regular' adult patients with recorded diabetes and  
10  
11 590 HbA1c control† Table S1. Sociodemographic and clinical profile of regular patients† aged 18+  
12  
13 591 years in the MedicineInsight database14  
15  
16 592 Table S2. Sociodemographic and clinical profile of regular patients† aged 18+ years with past  
17  
18 593 (2015-2016) or newly recorded diabetes (2017)19  
20  
21 594 Table S3. Adjusted proportion† of patients who had their clinical parameters monitored‡ in  
22  
23 595 2018 among those with past (2015-2016) or newly recorded diabetes (2017)24  
25  
26 596 Table S4. Adjusted odds ratio† of patients who had their clinical parameters monitored‡ in  
27  
28 597 2018 among those with past (2015-2016) or newly recorded diabetes (2017)29  
30  
31  
32 598 Table S5. Adjusted proportion† of patients who had all three parameters (HbA1c, blood  
33  
34 599 pressure and total cholesterol) monitored, among those with past (2015-2016) or newly  
35  
36 600 recorded diabetes (2017), according to sociodemographic and clinical characteristics37  
38  
39 601 Table S6. Adjusted odds ratio† of patients with controlled clinical goals in 2018 for diabetes  
40  
41 602 management among those with available results for the three key parameters (HbA1c, blood  
42  
43 603 pressure, and total cholesterol), past recorded diabetes as reference group†44  
45  
46  
47 604 Table S7. Adjusted proportion† of patients with 'normal' kidney function among those with  
48  
49 605 past (2015-2016) or newly recorded diabetes (2017) who had information on eGFR or ACR  
50  
51 606 and the three key parameters (HbA1c, blood pressure, and total cholesterol)52  
53  
54 607 Table S8. Adjusted odds ratio† combination of clinical parameters controlled in 2018 among  
55  
56 608 patients with past (2015-2016) or newly recorded diabetes (2017) and available results for all  
57  
58 609 three parameters (HbA1c, blood pressure, and total cholesterol)  
60



1  
2  
3 610 Table S9. Adjusted distribution† of patients with controlled HbA1c according to  
4  
5 611 sociodemographic and clinical characteristics among those with past (2015-2016) or newly  
6  
7 612 recorded diabetes (2017) who had information on the three key parameters (HbA1c, blood  
8  
9 613 pressure and total cholesterol)

11  
12 614 Table S10. Adjusted distribution† of patients with controlled blood pressure according to  
13  
14 615 sociodemographic and clinical characteristics among those with past (2015-2016) or newly  
15  
16 616 recorded diabetes (2017) who had information on the three key parameters (HbA1c, BP and  
17  
18 617 total cholesterol)

19  
20  
21  
22 618 Table S11. Adjusted distribution† of patients with controlled total cholesterol according to  
23  
24 619 sociodemographic and clinical characteristics among those with past (2015-2016) or newly  
25  
26 620 recorded diabetes (2017) who had information on the three key parameters (HbA1c, blood  
27  
28 621 pressure, and total cholesterol)

29  
30  
31  
32 622 S12 Table. Adjusted distribution† of patients with all three clinical parameters controlled  
33  
34 623 according to sociodemographic and clinical characteristics among those with past (2015-2016)  
35  
36 624 or newly recorded diabetes (2017)

37  
38  
39  
40 625 Table S13. Adjusted distribution of ‘none-controlled’ † diabetes according to  
41  
42 626 sociodemographic and clinical characteristics among patients with past (2015-2016) or newly  
43  
44 627 recorded diabetes (2017) who had information on the three key parameters (HbA1c, blood  
45  
46 628 pressure, and total cholesterol)

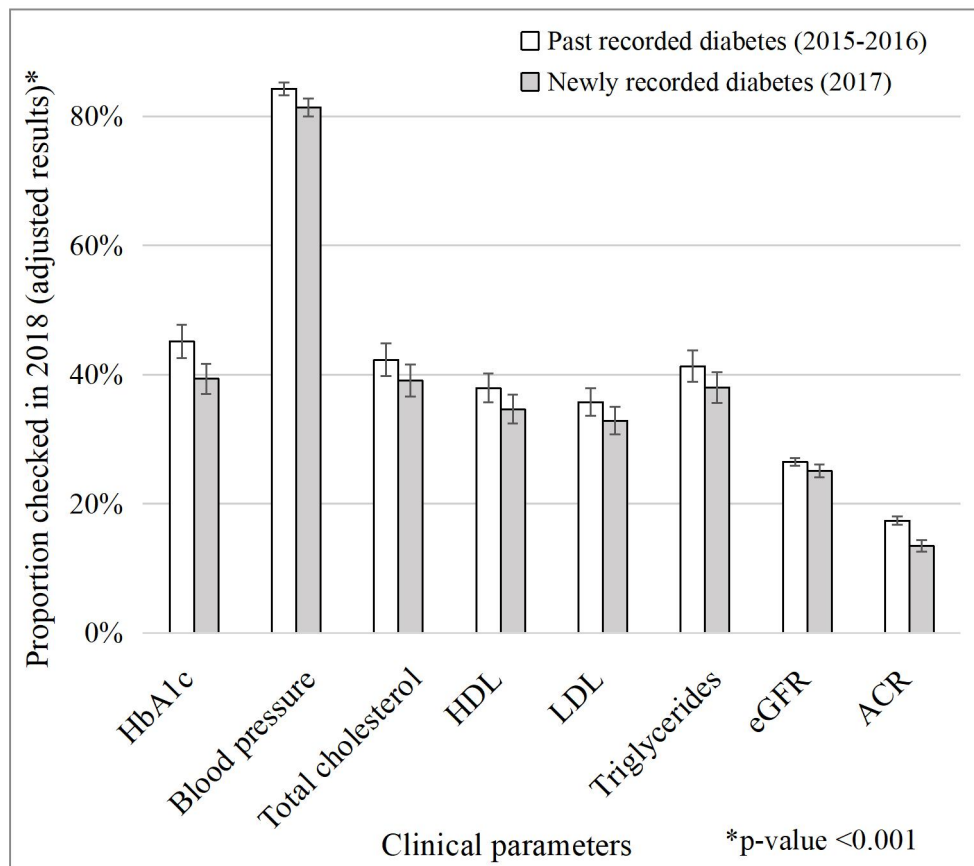

**Figure 1. Adjusted proportion of patients with clinical parameters monitored in 2018 among those with past (2015-2016) or newly recorded diabetes (2017).**

\* Results adjusted for differences between these two groups in terms of practice characteristics (remoteness, IRSAD quintiles), patient sociodemographics (gender, age), and CVD risk factors (smoking status, history of hypertension or CVD) using logistic regression models. Vertical lines represent the 95% CI. Due to the large sample size, all comparisons between patients with past or newly recorded diabetes returned p-values <0.01

HbA1c: Glycated haemoglobin; HDL-C: High-density lipoprotein cholesterol; LDL-C: Low-density lipoprotein cholesterol; eGFR: estimated Glomerular Filtration Rate; ACR: Urine albumin-to-creatinine ratio.

## Supplemental material

**Figure S1. Flowchart of the identification of ‘regular’ adult patients with recorded diabetes and HbA1c control<sup>†</sup>**

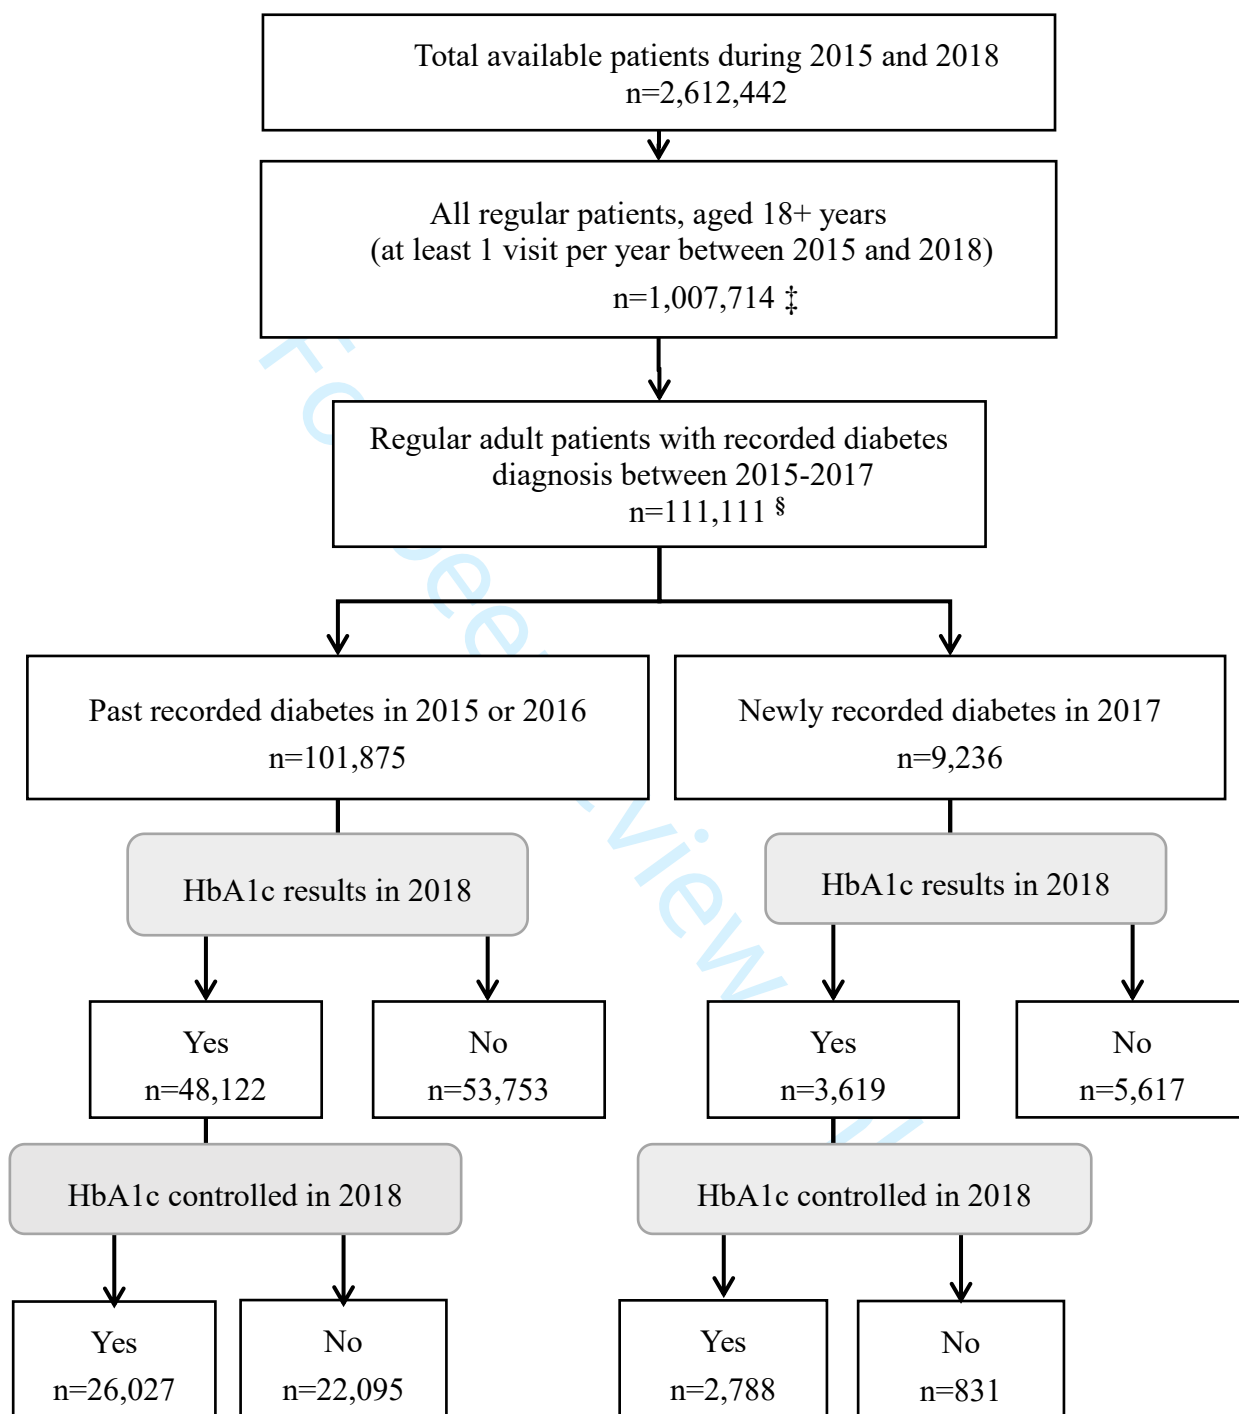

<sup>†</sup> Results are shown as absolute numbers from the dataset without adjusting or weighting. Adjusted proportions are shown in Table 1. <sup>‡</sup> At least one consultation per year between 2015-2018. <sup>§</sup> Patients were classified as recorded diabetes when 1) ‘diabetes’ was recorded on two different occasions (as a ‘diagnosis’, ‘reason for encounter’, or ‘reason for prescription’, OR 2) antidiabetic medications were prescribed (Anatomical Therapeutic Chemical A10A or A10B; metformin was considered only in the absence of polycystic ovary syndrome diagnosis), OR 3) diabetes diagnosis was recorded only once, but there was at least one laboratory result (fasting blood glucose, HbA1c or 2-hour oral glucose tolerance test) above the diabetes threshold.

**Table S1. Sociodemographic and clinical profile of regular patients<sup>†</sup> aged 18+ years in the MedicineInsight database**

|                                            | Distribution of regular patients (n=1,007,714)<br>% (95%CI) |
|--------------------------------------------|-------------------------------------------------------------|
| <b>Practice characteristics</b>            |                                                             |
| <b>Geographical area of GP</b>             |                                                             |
| Major Cities                               | 63.8 (59.4-68.2)                                            |
| Inner regional                             | 24.8 (20.6-28.9)                                            |
| Outer/Remote/Very Remote                   | 11.4 (8.5-14.4)                                             |
| <b>GP IRSAD quintiles</b>                  |                                                             |
| Very low                                   | 17.1 (13.2-21.0)                                            |
| Low                                        | 16.0 (12.3-19.7)                                            |
| Middle                                     | 23.6 (19.2-27.9)                                            |
| High                                       | 18.6 (14.8-22.4)                                            |
| Very High                                  | 27.1 (22.7-31.4)                                            |
| <b>Patient's characteristics</b>           |                                                             |
| <b>Gender</b>                              |                                                             |
| Males                                      | 40.4 (39.9-40.9)                                            |
| <b>Age, Mean ± SD</b>                      |                                                             |
|                                            | 54.0 ± 19.1                                                 |
| <b>Age group (years)</b>                   |                                                             |
| 18-39                                      | 26.2 (25.1-27.2)                                            |
| 40-64                                      | 40.9 (40.4-41.4)                                            |
| 65+                                        | 33.0 (31.7-34.2)                                            |
| <b>IRSAD Quintiles</b>                     |                                                             |
| Very low                                   | 17.1 (16.2-18.0)                                            |
| Low                                        | 17.4 (16.2-18.5)                                            |
| Middle                                     | 23.7 (22.4-25.1)                                            |
| High                                       | 19.0 (17.7-20.3)                                            |
| Very High                                  | 25.5 (24.3-26.7)                                            |
| <b>Smoking status</b>                      |                                                             |
| Smoker                                     | 12.0 (11.6-12.4)                                            |
| <b>History of hypertension</b>             |                                                             |
| Yes                                        | 19.5 (18.9-20.0)                                            |
| <b>History of CVD</b>                      |                                                             |
| Yes                                        | 5.5 (5.4-5.7)                                               |
| <b>Consultations in 2018, Median (IQR)</b> |                                                             |
|                                            | 4 (2-8)                                                     |

<sup>†</sup> People had at least one visit per year between 2015 and 2018. Results were adjusted for practice characteristics (remoteness, IRSAD quintiles), patient sociodemographics (gender, age), and CVD risk factors (smoking status, history of hypertension or CVD) using logistic regression models.

GP: general practice; 95%CI: 95% confidence interval; IRSAD: Index of Relative Socioeconomic Advantage and Disadvantage; IQR: Interquartile range; SD: Standard deviation; CVD: Cardiovascular diseases including heart failure, ischaemic heart disease, and stroke.

**Table S2. Sociodemographic and clinical profile of regular patients<sup>†</sup> aged 18+ years with past (2015-2016) or newly recorded diabetes (2017)**

| Variables                                  | Sample distribution                   |                                      |
|--------------------------------------------|---------------------------------------|--------------------------------------|
|                                            | Past recorded diabetes<br>(n=101,875) | Newly recorded diabetes<br>(n=9,236) |
|                                            | % (95%CI) <sup>‡</sup>                | % (95%CI) <sup>‡</sup>               |
| <b>Practice characteristics</b>            |                                       |                                      |
| <b>Geographical area of GP</b>             |                                       |                                      |
| Major Cities                               | 59.4 (54.6-64.2)                      | 62.3 (57.2-67.4)                     |
| Inner regional                             | 27.4 (22.8-32.1)                      | 25.0 (20.3-29.7)                     |
| Outer/Remote/Very Remote                   | 13.2 (9.8-16.5)                       | 12.7 (9.2-16.1)                      |
| <b>GP IRSAD quintiles</b>                  |                                       |                                      |
| Very low                                   | 21.6 (16.9-26.3)                      | 20.3 (15.8-24.9)                     |
| Low                                        | 17.9 (13.9-22.0)                      | 18.6 (14.1-23.0)                     |
| Middle                                     | 25.0 (20.3-29.6)                      | 24.6 (19.8-29.4)                     |
| High                                       | 16.1 (12.6-19.5)                      | 17.8 (13.9-21.7)                     |
| Very High                                  | 20.9 (17.1-24.7)                      | 20.9 (17.0-24.7)                     |
| <b>Patient's characteristics</b>           |                                       |                                      |
| <b>Gender</b>                              |                                       |                                      |
| Male                                       | 52.2 (51.6-52.7)                      | 46.3 (44.9-47.7)                     |
| <b>Age, Mean ± SD</b>                      | 65.9 ± 14.6                           | 58.1 ± 17.1                          |
| <b>Age group (years)</b>                   |                                       |                                      |
| 18-39                                      | 5.8 (5.4-6.2)                         | 15.8 (14.6-17.0)                     |
| 40-64                                      | 34.9 (34.0-35.7)                      | 43.0 (41.7-44.4)                     |
| 65+                                        | 59.4 (58.2-60.5)                      | 41.2 (39.5-42.9)                     |
| <b>IRSAD Quintiles</b>                     |                                       |                                      |
| Very low                                   | 21.3 (20.2-22.3)                      | 20.7 (19.5-21.9)                     |
| Low                                        | 18.8 (17.5-20.1)                      | 18.8 (17.3-20.3)                     |
| Middle                                     | 24.8 (23.4-26.1)                      | 24.3 (22.8-25.8)                     |
| High                                       | 16.0 (14.8-17.2)                      | 16.0 (14.6-17.5)                     |
| Very High                                  | 18.4 (17.4-19.5)                      | 19.4 (18.2-20.7)                     |
| <b>Smoking status</b>                      |                                       |                                      |
| Smoker                                     | 10.5 (10.1-10.8)                      | 11.0 (10.3-11.7)                     |
| <b>History of hypertension</b>             |                                       |                                      |
| Yes                                        | 36.5 (35.2-37.8)                      | 38.5 (36.9-40.1)                     |
| <b>History of CVD</b>                      |                                       |                                      |
| Yes                                        | 13.8 (13.3-14.2)                      | 12.9 (12.1-13.7)                     |
| <b>Consultations in 2018, Median (IQR)</b> |                                       |                                      |
|                                            | 7 (4-13)                              | 6 (3-11)                             |

<sup>†</sup> People had at least one visit per year between 2015 and 2018. <sup>‡</sup> Results adjusted for differences between these two groups in terms of practice characteristics (remoteness, IRSAD quintiles), patient sociodemographics (gender, age), and CVD risk factors (smoking status, history of hypertension or CVD) using logistic regression models.

GP: general practice; 95%CI: 95% confidence interval; IRSAD: Index of Relative Socioeconomic Advantage and Disadvantage; IQR: Interquartile range; SD: Standard deviation; CVD: Cardiovascular diseases including heart failure, ischemic heart disease, and stroke.

**Table S3. Adjusted proportion<sup>†</sup> of patients who had their clinical parameters monitored<sup>‡</sup> in 2018 among those with past (2015-2016) or newly recorded diabetes (2017)**

| Clinical parameters monitored                        | Patients monitored among those with past recorded diabetes<br>(n=101,875)<br>% (95% CI) | Patients monitored among those with newly recorded diabetes<br>(n=9,236)<br>% (95% CI) |
|------------------------------------------------------|-----------------------------------------------------------------------------------------|----------------------------------------------------------------------------------------|
| <b>Types of blood glucose monitored <sup>§</sup></b> |                                                                                         |                                                                                        |
| 0                                                    | 39.8 (37.5-42.1)                                                                        | 45.4 (43.0-47.7)                                                                       |
| 1                                                    | 23.8 (22.4-25.2)                                                                        | 21.7 (20.3-23.1)                                                                       |
| 2                                                    | 27.4 (25.7-29.2)                                                                        | 25.4 (23.6-27.1)                                                                       |
| 3                                                    | 9.0 (7.9-10.1)                                                                          | 7.5 (6.4-8.6)                                                                          |
| <b>HbA1c</b>                                         | 45.2 (42.6-47.7)                                                                        | 39.4 (37.1-41.7)                                                                       |
| <b>Blood pressure <sup>¶</sup></b>                   | 84.3 (83.3-85.3)                                                                        | 81.4 (80.0-82.8)                                                                       |
| <b>Total cholesterol</b>                             | 42.3 (39.8-44.8)                                                                        | 39.1 (36.6-41.6)                                                                       |
| <b>HDL</b>                                           | 38.0 (35.7-40.2)                                                                        | 34.7 (32.4-36.9)                                                                       |
| <b>LDL</b>                                           | 35.7 (33.6-37.9)                                                                        | 32.9 (30.7-35.0)                                                                       |
| <b>Triglycerides</b>                                 | 41.3 (38.9-43.7)                                                                        | 38.0 (35.6-40.4)                                                                       |
| <b>Any type of kidney function <sup>#</sup></b>      | 26.9 (26.3-27.5)                                                                        | 25.4 (24.4-26.4)                                                                       |
| <b>eGFR</b>                                          | 26.5 (25.9-27.1)                                                                        | 25.1 (24.1-26.1)                                                                       |
| <b>ACR</b>                                           | 17.4 (16.8-18.0)                                                                        | 13.5 (12.6-14.3)                                                                       |

<sup>†</sup> Results adjusted for differences between these two groups in terms of practice characteristics (remoteness, IRSAD quintiles), patient sociodemographics (gender, age), and CVD risk factors (smoking status, history of hypertension or CVD) using logistic regression models. <sup>‡</sup> We considered all tests performed, regardless they have valid, invalid, or inconclusive results. <sup>§</sup> Types of blood glucose monitored in 2018 among HbA1c, fasting blood glucose and random blood glucose. <sup>¶</sup> Both systolic and diastolic blood pressure were monitored in 2018. <sup>#</sup> Any types of kidney function monitored in 2018 among eGFR and ACR.

95%CI: 95% confidence interval; HbA1c: Glycated haemoglobin; HDL: High-density lipoprotein cholesterol; LDL: Low-density lipoprotein cholesterol; eGFR: estimated Glomerular Filtration Rate; ACR: Urine albumin-to-creatinine ratio.

**Table S4. Adjusted odds ratio<sup>†</sup> of patients who had their clinical parameters monitored<sup>‡</sup> in 2018 among those with past (2015-2016) or newly recorded diabetes (2017)**

| Clinical parameters monitored                  | Odds Ratio (95% CI) |
|------------------------------------------------|---------------------|
| <b>HbA1c</b>                                   |                     |
| Past recorded diabetes                         | Ref                 |
| Newly recorded diabetes                        | 0.78(0.74-0.83)     |
| <b>Blood pressure<sup>¶</sup></b>              |                     |
| Past recorded diabetes                         | Ref                 |
| Newly recorded diabetes                        | 0.81(0.75-0.87)     |
| <b>Total cholesterol</b>                       |                     |
| Past recorded diabetes                         | Ref                 |
| Newly recorded diabetes                        | 0.87(0.83-0.92)     |
| <b>HDL</b>                                     |                     |
| Past recorded diabetes                         | Ref                 |
| Newly recorded diabetes                        | 0.87(0.82-0.92)     |
| <b>LDL</b>                                     |                     |
| Past recorded diabetes                         | Ref                 |
| Newly recorded diabetes                        | 0.88(0.83-0.93)     |
| <b>Triglycerides</b>                           |                     |
| Past recorded diabetes                         | Ref                 |
| Newly recorded diabetes                        | 0.87(0.82-0.92)     |
| <b>Any type of kidney function<sup>#</sup></b> |                     |
| Past recorded diabetes                         | Ref                 |
| Newly recorded diabetes                        | 0.93(0.88-0.97)     |
| <b>eGFR</b>                                    |                     |
| Past recorded diabetes                         | Ref                 |
| Newly recorded diabetes                        | 0.93(0.88-0.98)     |
| <b>ACR</b>                                     |                     |
| Past recorded diabetes                         | Ref                 |
| Newly recorded diabetes                        | 0.74(0.69-0.79)     |

<sup>†</sup> Adjusted odds ratio of patients who had their clinical parameters monitored based on logistic regression models that considered differences among patients with past or newly recorded diabetes in terms of practice characteristics (remoteness, IRSAD quintiles), patient sociodemographics (gender, age), and CVD risk factors (smoking status, history of hypertension or CVD). <sup>‡</sup> We considered all tests performed, regardless they have valid, invalid, or inconclusive results. <sup>¶</sup> Both systolic and diastolic blood pressure were monitored in 2018. <sup>#</sup> Any types of kidney function monitored in 2018 among eGFR and ACR.

Ref: reference group; 95%CI: 95% confidence interval; HbA1c: Glycated haemoglobin; HDL: High-density lipoprotein cholesterol; LDL: Low-density lipoprotein cholesterol; eGFR: estimated Glomerular Filtration Rate; ACR: Urine albumin-to-creatinine ratio.

**Table S5. Adjusted proportion† of patients who had all three parameters (HbA1c, blood pressure and total cholesterol) monitored, among those with past (2015-2016) or newly recorded diabetes (2017), according to sociodemographic and clinical characteristics**

| Variables                        | Patients monitored among those with past recorded diabetes (n=101,875)<br>% (95%CI) | Patients monitored among those with newly recorded diabetes (n=9,236)<br>% (95%CI) |
|----------------------------------|-------------------------------------------------------------------------------------|------------------------------------------------------------------------------------|
| <b>Practice characteristics</b>  |                                                                                     |                                                                                    |
| <b>Geographical area of GP</b>   |                                                                                     |                                                                                    |
| Major Cities                     | 36.0 (32.9-39.2)                                                                    | 27.6 (25.1-30.1)                                                                   |
| Inner regional                   | 36.5 (31.2-41.7)                                                                    | 29.1 (24.8-33.3)                                                                   |
| Outer/Remote/Very Remote         | 46.5 (40.6-52.5)                                                                    | 36.7 (31.3-42.1)                                                                   |
| <b>GP IRSAD quintiles</b>        |                                                                                     |                                                                                    |
| Very low                         | 42.2 (35.7-48.6)                                                                    | 34.2 (28.5-39.9)                                                                   |
| Low                              | 35.0 (30.1-39.8)                                                                    | 26.9 (23.0-30.9)                                                                   |
| Middle                           | 37.7 (32.7-42.6)                                                                    | 26.4 (22.9-29.9)                                                                   |
| High                             | 38.1 (33.1-43.0)                                                                    | 30.0 (25.4-34.6)                                                                   |
| Very High                        | 34.7 (30.2-39.3)                                                                    | 28.9 (24.9-33.0)                                                                   |
| <b>Patient's characteristics</b> |                                                                                     |                                                                                    |
| <b>Gender</b>                    |                                                                                     |                                                                                    |
| Females                          | 36.5 (34.3-38.7)                                                                    | 26.9 (25.0-28.9)                                                                   |
| Males                            | 38.5 (36.2-40.9)                                                                    | 31.6 (29.2-33.9)                                                                   |
| <b>Age group (years)</b>         |                                                                                     |                                                                                    |
| 18-39                            | 17.6 (15.9-19.3)                                                                    | 12.0 (9.9-14.0)                                                                    |
| 40-64                            | 37.1 (34.9-39.3)                                                                    | 30.1 (27.9-32.4)                                                                   |
| 65+                              | 39.7 (37.2-42.2)                                                                    | 34.6 (32.0-37.2)                                                                   |
| <b>Smoking status</b>            |                                                                                     |                                                                                    |
| Non-smoker or ex-smoker          | 37.8 (35.5-40.1)                                                                    | 29.2 (27.3-31.1)                                                                   |
| Smoker                           | 35.5 (33.2-37.8)                                                                    | 28.4 (25.2-31.6)                                                                   |
| <b>History of hypertension</b>   |                                                                                     |                                                                                    |
| No                               | 36.6 (34.3-39.0)                                                                    | 27.8 (25.7-29.8)                                                                   |
| Yes                              | 39.1 (36.6-41.5)                                                                    | 31.4 (29.1-33.6)                                                                   |
| <b>History of CVD</b>            |                                                                                     |                                                                                    |
| No                               | 37.7 (35.4-40.0)                                                                    | 29.2 (27.2-31.1)                                                                   |
| Yes                              | 36.6 (34.2-39.0)                                                                    | 28.7 (25.7-31.7)                                                                   |

† Adjusted proportion of patients who had all three parameters monitored based on logistic regression models that considered differences among patients with past or newly recorded diabetes in terms of practice characteristics (remoteness, IRSAD quintiles), patient sociodemographics (gender, age), and CVD risk factors (smoking status, history of hypertension or CVD).

95%CI: 95% confidence interval; IRSAD: Index of Relative Socioeconomic Advantage and Disadvantage; CVD: Cardiovascular diseases including heart failure, ischemic heart disease, and stroke.



**Table S6. Adjusted odds ratio<sup>†</sup> of patients with controlled clinical goals in 2018 for diabetes management among those with available results for the three key parameters (HbA1c, blood pressure, and total cholesterol), past recorded diabetes as reference group<sup>†</sup>**

|                                                                                    | Patients achieved the targets of each clinical parameter |
|------------------------------------------------------------------------------------|----------------------------------------------------------|
|                                                                                    | Odds Ratio (95%CI)                                       |
| <b>HbA1c controlled (<math>\leq 7.0\%</math> or <math>\leq 53</math> mmol/mol)</b> |                                                          |
| Past recorded diabetes                                                             | Ref                                                      |
| Newly recorded diabetes                                                            | 3.11(2.84-3.41)                                          |
| <b>Systolic blood pressure controlled (<math>\leq 140</math>mmHg)</b>              |                                                          |
| Past recorded diabetes                                                             | Ref                                                      |
| Newly recorded diabetes                                                            | 1.05(0.97-1.15)                                          |
| <b>Diastolic blood pressure controlled (<math>\leq 90</math>mmHg)</b>              |                                                          |
| Past recorded diabetes                                                             | Ref                                                      |
| Newly recorded diabetes                                                            | 0.72(0.63-0.82)                                          |
| <b>Total cholesterol controlled (<math>\leq 4.0</math>mmol/L)</b>                  |                                                          |
| Past recorded diabetes                                                             | Ref                                                      |
| Newly recorded diabetes                                                            | 0.63(0.57-0.69)                                          |

<sup>†</sup> Adjusted odds ratio of patients with controlled clinical goals in 2018 for diabetes management among those with available results for the three key parameters (HbA1c, blood pressure, and total cholesterol) based on logistic regression models adjusted for (remoteness, IRSAD quintiles), patient sociodemographics (gender, age), and CVD risk factors (smoking status, history of hypertension or CVD).

Ref: reference group; 95%CI: 95% confidence interval; SD: Standard deviation; HbA1c: Glycated haemoglobin.

**Table S7. Adjusted proportion<sup>†</sup> of patients with ‘normal’ kidney function among those with past (2015-2016) or newly recorded diabetes (2017) who had information on eGFR or ACR and the three key parameters (HbA1c, blood pressure, and total cholesterol)**

|                                                      | Among patients with past recorded diabetes |                                                 | Among those with newly recorded diabetes |                                                 |
|------------------------------------------------------|--------------------------------------------|-------------------------------------------------|------------------------------------------|-------------------------------------------------|
|                                                      | Patients monitored (n)                     | Patients with normal kidney function % (95% CI) | Patients monitored (n)                   | Patients with normal kidney function % (95% CI) |
| <b>eGFR</b>                                          |                                            |                                                 |                                          |                                                 |
| Normal eGFR ( $\geq 60$ mL/min/1.73 m <sup>2</sup> ) | 21,912                                     | 78.0 (77.4-78.6)                                | 1,620                                    | 85.6 (83.8-87.5)                                |
| <b>ACR</b>                                           |                                            |                                                 |                                          |                                                 |
| Normal ACR (women $< 3.5$ , men $< 2.5$ mg/mmol)     | 16,589                                     | 67.9 (67.0-68.8)                                | 1,073                                    | 75.2 (72.7-77.7)                                |
| <b>Any kidney function</b>                           |                                            |                                                 |                                          |                                                 |
| Normal eGFR or ACR                                   | 22,109                                     | 85.9 (85.3-86.4)                                | 1,631                                    | 90.9 (89.5-92.3)                                |

<sup>†</sup> Adjusted proportions of patients who had each clinical parameter ‘controlled’ based on logistic regression models adjusted for (remoteness, IRSAD quintiles), patient sociodemographics (gender, age), and CVD risk factors (smoking status, history of hypertension or CVD).

95%CI: 95% confidence interval; eGFR: Estimated Glomerular Filtration Rate, ARC: albumin-to-creatinine ratio.

**Table S8. Adjusted odds ratio<sup>†</sup> combination of clinical parameters controlled in 2018 among patients with past (2015-2016) or newly recorded diabetes (2017) and available results for all three parameters (HbA1c, blood pressure, and total cholesterol)**

|                                                        | Odds Ratio (95%CI)<br>n=42,919 |
|--------------------------------------------------------|--------------------------------|
| <b>None controlled</b>                                 |                                |
| Past recorded diabetes                                 | Ref                            |
| Newly recorded diabetes                                | 0.54(0.45-0.65)                |
| <b>Only HbA1c controlled</b>                           |                                |
| Past recorded diabetes                                 | Ref                            |
| Newly recorded diabetes                                | 1.62(1.40-1.87)                |
| <b>Only blood pressure controlled</b>                  |                                |
| Past recorded diabetes                                 | Ref                            |
| Newly recorded diabetes                                | 0.49(0.42-0.58)                |
| <b>Only total cholesterol controlled</b>               |                                |
| Past recorded diabetes                                 | Ref                            |
| Newly recorded diabetes                                | 0.33(0.25-0.42)                |
| <b>HbA1c and blood pressure controlled</b>             |                                |
| Past recorded diabetes                                 | Ref                            |
| Newly recorded diabetes                                | 1.65(1.46-1.87)                |
| <b>HbA1c and total cholesterol controlled</b>          |                                |
| Past recorded diabetes                                 | Ref                            |
| Newly recorded diabetes                                | 1.01(0.84-1.22)                |
| <b>Blood pressure and total cholesterol controlled</b> |                                |
| Past recorded diabetes                                 | Ref                            |
| Newly recorded diabetes                                | 0.36(0.30-0.44)                |
| <b>All controlled</b>                                  |                                |
| Past recorded diabetes                                 | Ref                            |
| Newly recorded diabetes                                | (base outcome)                 |

<sup>†</sup> Adjusted odds ratio of the most frequent combination of clinical parameters controlled in 2018 based on multinomial logistic regression models adjusted for (remoteness, IRSAD quintiles), patient sociodemographics (gender, age), and CVD risk factors (smoking status, history of hypertension or CVD).

Ref: reference group; 95%CI: 95% confidence interval; HbA1c: Glycated haemoglobin.

**Table S9. Adjusted distribution<sup>†</sup> of patients with controlled HbA1c according to sociodemographic and clinical characteristics among those with past (2015-2016) or newly recorded diabetes (2017) who had information on the three key parameters (HbA1c, blood pressure and total cholesterol)**

| Variables                        | Patients with controlled HbA1c among those with past recorded diabetes (n=40,008) % (95%CI) | Patients with controlled HbA1c among those with newly recorded diabetes (n=2,912) % (95%CI) |
|----------------------------------|---------------------------------------------------------------------------------------------|---------------------------------------------------------------------------------------------|
| <b>Practice characteristics</b>  |                                                                                             |                                                                                             |
| <b>Geographical area of GP</b>   |                                                                                             |                                                                                             |
| Major Cities                     | 53.7 (52.3-55.2)                                                                            | 77.1 (74.6-79.6)                                                                            |
| Inner regional                   | 56.9 (54.7-59.1)                                                                            | 80.3 (76.8-83.7)                                                                            |
| Outer/Remote/Very                | 53.2 (50.8-55.5)                                                                            | 73.8 (69.0-78.6)                                                                            |
| <b>GP IRSAD quintiles</b>        |                                                                                             |                                                                                             |
| Very low                         | 52.9 (50.3-55.4)                                                                            | 78.5 (74.8-82.1)                                                                            |
| Low                              | 56.1 (53.9-58.4)                                                                            | 78.9 (74.0-83.7)                                                                            |
| Middle                           | 53.8 (51.8-55.7)                                                                            | 78.3 (74.6-81.9)                                                                            |
| High                             | 54.7 (52.4-56.9)                                                                            | 77.0 (72.7-81.3)                                                                            |
| Very High                        | 56.2 (54.1-58.2)                                                                            | 74.3 (70.3-78.2)                                                                            |
| <b>Patient's characteristics</b> |                                                                                             |                                                                                             |
| <b>Gender</b>                    |                                                                                             |                                                                                             |
| Females                          | 56.2 (55.2-57.3)                                                                            | 80.4 (78.3-82.6)                                                                            |
| Males                            | 53.1 (52.0-54.1)                                                                            | 74.4 (72.1-76.7)                                                                            |
| <b>Age group (years)</b>         |                                                                                             |                                                                                             |
| 18-39                            | 43.3 (39.9-46.7)                                                                            | 71.1 (64.2-77.9)                                                                            |
| 40-64                            | 48.0 (46.8-49.3)                                                                            | 74.5 (71.9-77.1)                                                                            |
| 65+                              | 58.5 (57.4-59.5)                                                                            | 80.6 (78.5-82.7)                                                                            |
| <b>Smoking status</b>            |                                                                                             |                                                                                             |
| Non-smoker or ex-                | 54.9 (53.9-55.9)                                                                            | 77.8 (76.0-79.6)                                                                            |
| Smoker                           | 50.9 (49.2-52.6)                                                                            | 74.1 (69.0-79.1)                                                                            |
| <b>History of hypertension</b>   |                                                                                             |                                                                                             |
| No                               | 53.2 (52.1-54.3)                                                                            | 76.4 (74.3-78.4)                                                                            |
| Yes                              | 56.5 (55.3-57.7)                                                                            | 78.7 (76.2-81.2)                                                                            |
| <b>History of CVD</b>            |                                                                                             |                                                                                             |
| No                               | 55.2 (54.2-56.2)                                                                            | 77.5 (75.7-79.3)                                                                            |
| Yes                              | 50.6 (49.1-52.2)                                                                            | 76.3 (72.0-80.6)                                                                            |

<sup>†</sup> Adjusted proportions of patients who had information on the three key parameters (HbA1c, blood pressure and total cholesterol) and had HbA1c controlled ( $\leq 7.0\%$ ) based on logistic regression models adjusted for (remoteness, IRSAD quintiles), patient sociodemographics (gender, age), and CVD risk factors (smoking status, history of hypertension or CVD).

GP: general practice; 95%CI: 95% confidence interval, IRSAD: Index of Relative Socioeconomic Advantage and Disadvantage, CVD: Cardiovascular diseases including heart failure, ischemic heart disease, and stroke.

**Table S10. Adjusted distribution<sup>†</sup> of patients with controlled blood pressure according to sociodemographic and clinical characteristics among those with past (2015-2016) or newly recorded diabetes (2017) who had information on the three key parameters (HbA1c, BP and total cholesterol)**

| Variables                        | Patients with controlled BP among those with past recorded diabetes (n=40,008) % (95%CI) | Patients with controlled BP among those with newly recorded diabetes (n=2,912) % (95%CI) |
|----------------------------------|------------------------------------------------------------------------------------------|------------------------------------------------------------------------------------------|
| <b>Practice characteristics</b>  |                                                                                          |                                                                                          |
| <b>Geographical area of GP</b>   |                                                                                          |                                                                                          |
| Major Cities                     | 70.2 (68.8-71.6)                                                                         | 71.6 (69.1-74.1)                                                                         |
| Inner regional                   | 66.4 (64.0-68.7)                                                                         | 66.8 (62.6-71.0)                                                                         |
| Outer/Remote/Very Remote         | 67.5 (64.0-71.0)                                                                         | 66.3 (61.2-71.5)                                                                         |
| <b>GP IRSAD quintiles</b>        |                                                                                          |                                                                                          |
| Very low                         | 71.4 (68.8-73.9)                                                                         | 72.5 (68.0-77.0)                                                                         |
| Low                              | 67.7 (65.5-69.9)                                                                         | 69.3 (64.8-73.7)                                                                         |
| Middle                           | 68.9 (66.5-71.4)                                                                         | 69.5 (65.8-73.3)                                                                         |
| High                             | 67.1 (64.1-70.2)                                                                         | 68.6 (64.4-72.9)                                                                         |
| Very High                        | 66.9 (64.8-69.0)                                                                         | 67.5 (63.1-71.9)                                                                         |
| <b>Patient's characteristics</b> |                                                                                          |                                                                                          |
| <b>Gender</b>                    |                                                                                          |                                                                                          |
| Females                          | 68.5 (67.2-69.7)                                                                         | 72.0 (69.5-74.6)                                                                         |
| Males                            | 68.9 (67.7-70.2)                                                                         | 67.4 (64.8-70.0)                                                                         |
| <b>Age group (years)</b>         |                                                                                          |                                                                                          |
| 18-39                            | 79.5 (76.8-82.2)                                                                         | 77.5 (71.3-83.8)                                                                         |
| 40-64                            | 70.8 (69.5-72.1)                                                                         | 72.4 (69.8-74.9)                                                                         |
| 65+                              | 67.2 (66.0-68.4)                                                                         | 66.2 (63.6-68.7)                                                                         |
| <b>Smoking status</b>            |                                                                                          |                                                                                          |
| Non-smoker or ex-smoker          | 68.6 (67.5-69.7)                                                                         | 69.3 (67.4-71.3)                                                                         |
| Smoker                           | 69.5 (67.8-71.2)                                                                         | 71.7 (66.2-77.1)                                                                         |
| <b>History of hypertension</b>   |                                                                                          |                                                                                          |
| No                               | 73.6 (72.5-74.7)                                                                         | 73.5 (71.2-75.8)                                                                         |
| Yes                              | 61.2 (59.8-62.6)                                                                         | 64.1 (61.3-66.9)                                                                         |
| <b>History of CVD</b>            |                                                                                          |                                                                                          |
| No                               | 68.0 (66.9-69.1)                                                                         | 68.8 (66.8-70.7)                                                                         |
| Yes                              | 72.8 (71.4-74.1)                                                                         | 75.3 (70.8-79.8)                                                                         |

<sup>†</sup> Adjusted proportions of patients who had information on the three key parameters (HbA1c, blood pressure and total cholesterol) and had BP controlled ( $\leq 140/90$ mmHg) based on logistic regression models adjusted for (remoteness, IRSAD quintiles), patient sociodemographics (gender, age), and CVD risk factors (smoking status, history of hypertension or CVD).

GP: general practice; BP: blood pressure; 95%CI: 95% confidence interval; IRSAD: Index of Relative Socioeconomic Advantage and Disadvantage; CVD: Cardiovascular diseases including heart failure, ischemic heart disease, and stroke.

**Table S11. Adjusted distribution<sup>†</sup> of patients with controlled total cholesterol according to sociodemographic and clinical characteristics among those with past (2015-2016) or newly recorded diabetes (2017) who had information on the three key parameters (HbA1c, blood pressure, and total cholesterol)**

| Variables                        | Patients with controlled total cholesterol among those with past recorded diabetes (n=40,008) % (95%CI) | Patients with controlled total cholesterol among those with newly recorded diabetes (n=2,912) % (95%CI) |
|----------------------------------|---------------------------------------------------------------------------------------------------------|---------------------------------------------------------------------------------------------------------|
| <b>Practice characteristics</b>  |                                                                                                         |                                                                                                         |
| <b>Geographical area of GP</b>   |                                                                                                         |                                                                                                         |
| Major Cities                     | 44.5 (43.1-45.8)                                                                                        | 31.0 (28.4-33.7)                                                                                        |
| Inner regional                   | 45.1 (43.0-47.2)                                                                                        | 30.4 (26.8-34.0)                                                                                        |
| Outer/Remote/Very Remote         | 41.8 (39.7-44.0)                                                                                        | 29.4 (24.5-34.3)                                                                                        |
| <b>GP IRSAD quintiles</b>        |                                                                                                         |                                                                                                         |
| Very low                         | 44.0 (42.3-45.7)                                                                                        | 31.7 (27.5-35.8)                                                                                        |
| Low                              | 44.3 (41.8-46.9)                                                                                        | 30.1 (25.6-34.5)                                                                                        |
| Middle                           | 44.2 (42.2-46.2)                                                                                        | 36.4 (32.4-40.4)                                                                                        |
| High                             | 42.9 (40.0-45.7)                                                                                        | 26.2 (21.6-30.9)                                                                                        |
| Very High                        | 45.4 (43.0-47.7)                                                                                        | 27.4 (23.1-31.7)                                                                                        |
| <b>Patient's characteristics</b> |                                                                                                         |                                                                                                         |
| <b>Gender</b>                    |                                                                                                         |                                                                                                         |
| Females                          | 35.7 (34.6-36.8)                                                                                        | 22.6 (20.4-24.8)                                                                                        |
| Males                            | 51.3 (50.3-52.3)                                                                                        | 37.9 (35.2-40.7)                                                                                        |
| <b>Age group (years)</b>         |                                                                                                         |                                                                                                         |
| 18-39                            | 19.7 (17.0-22.3)                                                                                        | 19.3 (12.8-25.8)                                                                                        |
| 40-64                            | 34.0 (32.9-35.2)                                                                                        | 24.0 (21.6-26.3)                                                                                        |
| 65+                              | 50.7 (49.6-51.8)                                                                                        | 37.8 (35.2-40.5)                                                                                        |
| <b>Smoking status</b>            |                                                                                                         |                                                                                                         |
| Non-smoker or ex-smoker          | 44.3 (43.3-45.3)                                                                                        | 30.7 (28.9-32.5)                                                                                        |
| Smoker                           | 43.4 (41.7-45.1)                                                                                        | 29.9 (25.2-34.5)                                                                                        |
| <b>History of hypertension</b>   |                                                                                                         |                                                                                                         |
| No                               | 44.1 (43.1-45.2)                                                                                        | 30.5 (28.3-32.8)                                                                                        |
| Yes                              | 44.3 (43.0-45.5)                                                                                        | 30.7 (28.1-33.3)                                                                                        |
| <b>History of CVD</b>            |                                                                                                         |                                                                                                         |
| No                               | 42.2 (41.2-43.2)                                                                                        | 27.7 (25.9-29.6)                                                                                        |
| Yes                              | 56.0 (54.5-57.4)                                                                                        | 49.7 (44.1-55.2)                                                                                        |

<sup>†</sup> Adjusted proportions of patients who had information on the three key parameters (HbA1c, blood pressure and total cholesterol) and had total cholesterol controlled ( $\leq 4.0$ mmol/L) based on logistic regression models adjusted for (remoteness, IRSAD quintiles), patient sociodemographics (gender, age), and CVD risk factors (smoking status, history of hypertension or CVD).

GP: general practice; 95%CI: 95% confidence interval; IRSAD: Index of Relative Socioeconomic Advantage and Disadvantage; CVD: Cardiovascular diseases including heart failure, ischemic heart disease, and stroke.

**Table S12. Adjusted distribution† of patients with all three clinical parameters controlled according to sociodemographic and clinical characteristics among those with past (2015-2016) or newly recorded diabetes (2017)**

| Variables                        | 'All-controlled' among past recorded diabetes (n=40,008)<br>% (95%CI) | 'All-controlled' among newly recorded diabetes (n=2,912)<br>% (95%CI) |
|----------------------------------|-----------------------------------------------------------------------|-----------------------------------------------------------------------|
| <b>Practice characteristics</b>  |                                                                       |                                                                       |
| <b>Geographical area of GP</b>   |                                                                       |                                                                       |
| Major Cities                     | 17.5 (16.6-18.3)                                                      | 16.9 (14.9-18.9)                                                      |
| Inner regional                   | 18.2 (16.7-19.8)                                                      | 18.4 (15.2-21.6)                                                      |
| Outer/Remote/Very Remote         | 16.6 (14.7-18.5)                                                      | 15.7 (12.2-19.1)                                                      |
| <b>GP IRSAD quintiles</b>        |                                                                       |                                                                       |
| Very low                         | 17.5 (15.9-19.1)                                                      | 18.8 (15.4-22.2)                                                      |
| Low                              | 17.7 (16.5-19.0)                                                      | 16.8 (13.3-20.3)                                                      |
| Middle                           | 17.6 (16.0-19.1)                                                      | 19.0 (15.8-22.2)                                                      |
| High                             | 16.9 (15.2-18.5)                                                      | 15.6 (12.1-19.1)                                                      |
| Very High                        | 18.0 (16.7-19.3)                                                      | 14.5 (11.5-17.5)                                                      |
| <b>Patient's characteristics</b> |                                                                       |                                                                       |
| <b>Gender</b>                    |                                                                       |                                                                       |
| Females                          | 14.5 (13.7-15.2)                                                      | 13.0 (11.2-14.8)                                                      |
| Males                            | 20.1 (19.3-20.9)                                                      | 20.8 (18.6-22.9)                                                      |
| <b>Age group (years)</b>         |                                                                       |                                                                       |
| 18-39                            | 7.4 (5.7-9.0)                                                         | 11.3 (6.6-16.0)                                                       |
| 40-64                            | 12.4 (11.6-13.2)                                                      | 13.6 (11.6-15.6)                                                      |
| 65+                              | 20.7 (19.9-21.5)                                                      | 20.8 (18.6-23.1)                                                      |
| <b>Smoking status</b>            |                                                                       |                                                                       |
| Non-smoker or ex-smoker          | 17.6 (17.0-18.3)                                                      | 16.9 (15.5-18.4)                                                      |
| Smoker                           | 16.4 (15.0-17.7)                                                      | 18.4 (14.5-22.3)                                                      |
| <b>History of hypertension</b>   |                                                                       |                                                                       |
| No                               | 18.1 (17.3-18.9)                                                      | 17.0 (15.2-18.8)                                                      |
| Yes                              | 16.7 (15.8-17.6)                                                      | 17.2 (15.1-19.3)                                                      |
| <b>History of CVD</b>            |                                                                       |                                                                       |
| No                               | 16.7 (16.0-17.4)                                                      | 15.1 (13.6-16.6)                                                      |
| Yes                              | 21.8 (20.6-22.9)                                                      | 29.7 (24.6-34.8)                                                      |

† 'All-controlled' are those patients with HbA1c $\leq$ 7.0%, BP $\leq$ 140/90mmHg, and total cholesterol  $\leq$ 4.0mmol/L. Adjusted proportions of patients who had each clinical parameter controlled based on logistic regression models adjusted for (remoteness, IRSAD quintiles), patient sociodemographics (gender, age), and CVD risk factors (smoking status, history of hypertension or CVD).

95%CI: 95% confidence interval; IRSAD: Index of Relative Socioeconomic Advantage and Disadvantage; CVD: Cardiovascular diseases including heart failure, ischemic heart disease, and stroke.

**Table S13. Adjusted distribution of ‘none-controlled’ † diabetes according to sociodemographic and clinical characteristics among patients with past (2015-2016) or newly recorded diabetes (2017) who had information on the three key parameters (HbA1c, blood pressure, and total cholesterol)**

| Variables                        | ‘None-controlled’ among past recorded diabetes (n=40,008) % (95%CI) | ‘None-controlled’ among newly recorded diabetes (n=2,912) % (95%CI) |
|----------------------------------|---------------------------------------------------------------------|---------------------------------------------------------------------|
| <b>Practice characteristics</b>  |                                                                     |                                                                     |
| <b>Geographical area of GP</b>   |                                                                     |                                                                     |
| Major Cities                     | 8.2(7.6-8.9)                                                        | 5.0(3.9-6.2)                                                        |
| Inner regional                   | 9.0(7.8-10.2)                                                       | 5.4(3.6-7.3)                                                        |
| Outer/Remote/Very Remote         | 10.3(8.8-11.9)                                                      | 6.8(4.2-9.4)                                                        |
| <b>GP IRSAD quintiles</b>        |                                                                     |                                                                     |
| Very low                         | 9.0(7.9-10.2)                                                       | 6.1(4.0-8.2)                                                        |
| Low                              | 9.5(8.1-10.9)                                                       | 6.5(4.1-8.8)                                                        |
| Middle                           | 9.0(7.8-10.3)                                                       | 4.6(2.9-6.3)                                                        |
| High                             | 8.3(7.5-9.2)                                                        | 4.3(2.5-6.2)                                                        |
| Very High                        | 8.4(7.2-9.5)                                                        | 5.5(3.5-7.4)                                                        |
| <b>Patient’s characteristics</b> |                                                                     |                                                                     |
| <b>Gender</b>                    |                                                                     |                                                                     |
| Females                          | 9.5(8.9-10.1)                                                       | 5.3(4.1-6.5)                                                        |
| Males                            | 8.2(7.6-8.8)                                                        | 5.5(4.4-6.7)                                                        |
| <b>Age group (years)</b>         |                                                                     |                                                                     |
| 18-39                            | 9.8(7.7-11.8)                                                       | 2.2(0.1-4.3)                                                        |
| 40-64                            | 11.0(10.2-11.8)                                                     | 7.3(5.8-8.9)                                                        |
| 65+                              | 7.6(7.1-8.1)                                                        | 4.1(3.1-5.0)                                                        |
| <b>Smoking status</b>            |                                                                     |                                                                     |
| Non-smoker or ex-smoker          | 8.7(8.2-9.2)                                                        | 5.2(4.3-6.0)                                                        |
| Smoker                           | 9.6(8.5-10.6)                                                       | 7.0(4.3-9.8)                                                        |
| <b>History of hypertension</b>   |                                                                     |                                                                     |
| No                               | 7.7(7.1-8.2)                                                        | 4.6(3.6-5.7)                                                        |
| Yes                              | 10.7(9.9-11.4)                                                      | 6.5(5.2-7.9)                                                        |
| <b>History of CVD</b>            |                                                                     |                                                                     |
| No                               | 9.1(8.6-9.7)                                                        | 5.8(4.8-6.7)                                                        |
| Yes                              | 6.7(6.0-7.5)                                                        | 2.8(1.1-4.5)                                                        |

† ‘None-controlled’ was defined as patients who cannot control all three key parameters (HbA1c, blood pressure and total cholesterol) who had information on the three key parameters, the proportions were based on logistic regression models adjusted for (remoteness, IRSAD quintiles), patient sociodemographics (gender, age), and CVD risk factors (smoking status, history of hypertension or CVD).

GP: general practice; 95%CI: 95% confidence interval; IRSAD: Index of Relative Socioeconomic Advantage and Disadvantage; CVD: Cardiovascular diseases including heart failure, ischemic heart disease, and stroke.



**The RECORD statement – checklist of items, extended from the STROBE statement, that should be reported in observational studies using routinely collected health data.**

|                           | Item No. | STROBE items                                                                                                                                                                               | Location in manuscript where items are reported | RECORD items                                                                                                                                                                                                                                                                                                                                                                                                                                | Location in manuscript where items are reported |
|---------------------------|----------|--------------------------------------------------------------------------------------------------------------------------------------------------------------------------------------------|-------------------------------------------------|---------------------------------------------------------------------------------------------------------------------------------------------------------------------------------------------------------------------------------------------------------------------------------------------------------------------------------------------------------------------------------------------------------------------------------------------|-------------------------------------------------|
| <b>Title and abstract</b> |          |                                                                                                                                                                                            |                                                 |                                                                                                                                                                                                                                                                                                                                                                                                                                             |                                                 |
|                           | 1        | (a) Indicate the study's design with a commonly used term in the title or the abstract (b) Provide in the abstract an informative and balanced summary of what was done and what was found |                                                 | RECORD 1.1: The type of data used should be specified in the title or abstract. When possible, the name of the databases used should be included.<br><br>RECORD 1.2: If applicable, the geographic region and timeframe within which the study took place should be reported in the title or abstract.<br><br>RECORD 1.3: If linkage between databases was conducted for the study, this should be clearly stated in the title or abstract. | Lines 17-41                                     |
| <b>Introduction</b>       |          |                                                                                                                                                                                            |                                                 |                                                                                                                                                                                                                                                                                                                                                                                                                                             |                                                 |
| Background rationale      | 2        | Explain the scientific background and rationale for the investigation being reported                                                                                                       |                                                 |                                                                                                                                                                                                                                                                                                                                                                                                                                             | Lines 59-95                                     |
| Objectives                | 3        | State specific objectives, including any prespecified hypotheses                                                                                                                           |                                                 |                                                                                                                                                                                                                                                                                                                                                                                                                                             | Lines 96-101                                    |
| <b>Methods</b>            |          |                                                                                                                                                                                            |                                                 |                                                                                                                                                                                                                                                                                                                                                                                                                                             |                                                 |
| Study Design              | 4        | Present key elements of study design early in the paper                                                                                                                                    |                                                 |                                                                                                                                                                                                                                                                                                                                                                                                                                             | Lines 103-111                                   |
| Setting                   | 5        | Describe the setting, locations, and relevant dates, including periods of recruitment, exposure, follow-up, and data collection                                                            |                                                 |                                                                                                                                                                                                                                                                                                                                                                                                                                             | Lines 103-121                                   |
| Participants              | 6        | (a) <i>Cohort study</i> - Give the                                                                                                                                                         |                                                 | RECORD 6.1: The methods of study                                                                                                                                                                                                                                                                                                                                                                                                            | Lines 122-141                                   |

|                                                                                                                                                 |                              |                                                                                                                                                                                                                                                                                                                                                                                                                                                                                                                                                                                                                                                                                           |                                                                                                                                                                                      |                                                                                                                                                                                                                                                                                                                                                                                                                                                                                                                                                                                                                                                                     |                                 |
|-------------------------------------------------------------------------------------------------------------------------------------------------|------------------------------|-------------------------------------------------------------------------------------------------------------------------------------------------------------------------------------------------------------------------------------------------------------------------------------------------------------------------------------------------------------------------------------------------------------------------------------------------------------------------------------------------------------------------------------------------------------------------------------------------------------------------------------------------------------------------------------------|--------------------------------------------------------------------------------------------------------------------------------------------------------------------------------------|---------------------------------------------------------------------------------------------------------------------------------------------------------------------------------------------------------------------------------------------------------------------------------------------------------------------------------------------------------------------------------------------------------------------------------------------------------------------------------------------------------------------------------------------------------------------------------------------------------------------------------------------------------------------|---------------------------------|
| 1<br>2<br>3<br>4<br>5<br>6<br>7<br>8<br>9<br>10<br>11<br>12<br>13<br>14<br>15<br>16<br>17<br>18<br>19<br>20<br>21<br>22<br>23<br>24<br>25<br>26 |                              | <p>eligibility criteria, and the sources and methods of selection of participants. Describe methods of follow-up</p> <p><i>Case-control study</i> - Give the eligibility criteria, and the sources and methods of case ascertainment and control selection. Give the rationale for the choice of cases and controls</p> <p><i>Cross-sectional study</i> - Give the eligibility criteria, and the sources and methods of selection of participants</p> <p><i>(b) Cohort study</i> - For matched studies, give matching criteria and number of exposed and unexposed</p> <p><i>Case-control study</i> - For matched studies, give matching criteria and the number of controls per case</p> |                                                                                                                                                                                      | <p>population selection (such as codes or algorithms used to identify subjects) should be listed in detail. If this is not possible, an explanation should be provided.</p> <p>RECORD 6.2: Any validation studies of the codes or algorithms used to select the population should be referenced. If validation was conducted for this study and not published elsewhere, detailed methods and results should be provided.</p> <p>RECORD 6.3: If the study involved linkage of databases, consider use of a flow diagram or other graphical display to demonstrate the data linkage process, including the number of individuals with linked data at each stage.</p> | <p>Lines 109-111</p> <p>n/a</p> |
| 27<br>28<br>29<br>30<br>31<br>32<br>33                                                                                                          | Variables                    | 7                                                                                                                                                                                                                                                                                                                                                                                                                                                                                                                                                                                                                                                                                         | Clearly define all outcomes, exposures, predictors, potential confounders, and effect modifiers. Give diagnostic criteria, if applicable.                                            | RECORD 7.1: A complete list of codes and algorithms used to classify exposures, outcomes, confounders, and effect modifiers should be provided. If these cannot be reported, an explanation should be provided.                                                                                                                                                                                                                                                                                                                                                                                                                                                     | Lines 142-179                   |
| 34<br>35<br>36<br>37<br>38<br>39<br>40<br>41                                                                                                    | Data sources/<br>measurement | 8                                                                                                                                                                                                                                                                                                                                                                                                                                                                                                                                                                                                                                                                                         | For each variable of interest, give sources of data and details of methods of assessment (measurement). Describe comparability of assessment methods if there is more than one group |                                                                                                                                                                                                                                                                                                                                                                                                                                                                                                                                                                                                                                                                     | Lines 142-179                   |
| 42<br>43<br>44                                                                                                                                  | Bias                         | 9                                                                                                                                                                                                                                                                                                                                                                                                                                                                                                                                                                                                                                                                                         | Describe any efforts to address potential sources of bias                                                                                                                            |                                                                                                                                                                                                                                                                                                                                                                                                                                                                                                                                                                                                                                                                     | Lines 187-202                   |

45  
46  
47

|    |                                  |    |                                                                                                                                                                                                                                                                                                                                                                                                                                                                                                                                                                      |  |                                                                                                                                                                                                                                                              |                                |
|----|----------------------------------|----|----------------------------------------------------------------------------------------------------------------------------------------------------------------------------------------------------------------------------------------------------------------------------------------------------------------------------------------------------------------------------------------------------------------------------------------------------------------------------------------------------------------------------------------------------------------------|--|--------------------------------------------------------------------------------------------------------------------------------------------------------------------------------------------------------------------------------------------------------------|--------------------------------|
| 1  | Study size                       | 10 | Explain how the study size was arrived at                                                                                                                                                                                                                                                                                                                                                                                                                                                                                                                            |  |                                                                                                                                                                                                                                                              | n/a                            |
| 2  | Quantitative variables           | 11 | Explain how quantitative variables were handled in the analyses. If applicable, describe which groupings were chosen, and why                                                                                                                                                                                                                                                                                                                                                                                                                                        |  |                                                                                                                                                                                                                                                              | Lines 142-166                  |
| 3  |                                  |    |                                                                                                                                                                                                                                                                                                                                                                                                                                                                                                                                                                      |  |                                                                                                                                                                                                                                                              |                                |
| 4  | Statistical methods              | 12 | (a) Describe all statistical methods, including those used to control for confounding<br>(b) Describe any methods used to examine subgroups and interactions<br>(c) Explain how missing data were addressed<br>(d) <i>Cohort study</i> - If applicable, explain how loss to follow-up was addressed<br><i>Case-control study</i> - If applicable, explain how matching of cases and controls was addressed<br><i>Cross-sectional study</i> - If applicable, describe analytical methods taking account of sampling strategy<br>(e) Describe any sensitivity analyses |  |                                                                                                                                                                                                                                                              | Lines 180-206                  |
| 5  |                                  |    |                                                                                                                                                                                                                                                                                                                                                                                                                                                                                                                                                                      |  |                                                                                                                                                                                                                                                              |                                |
| 6  |                                  |    |                                                                                                                                                                                                                                                                                                                                                                                                                                                                                                                                                                      |  |                                                                                                                                                                                                                                                              |                                |
| 7  |                                  |    |                                                                                                                                                                                                                                                                                                                                                                                                                                                                                                                                                                      |  |                                                                                                                                                                                                                                                              |                                |
| 8  |                                  |    |                                                                                                                                                                                                                                                                                                                                                                                                                                                                                                                                                                      |  |                                                                                                                                                                                                                                                              |                                |
| 9  |                                  |    |                                                                                                                                                                                                                                                                                                                                                                                                                                                                                                                                                                      |  |                                                                                                                                                                                                                                                              |                                |
| 10 |                                  |    |                                                                                                                                                                                                                                                                                                                                                                                                                                                                                                                                                                      |  |                                                                                                                                                                                                                                                              |                                |
| 11 |                                  |    |                                                                                                                                                                                                                                                                                                                                                                                                                                                                                                                                                                      |  |                                                                                                                                                                                                                                                              |                                |
| 12 |                                  |    |                                                                                                                                                                                                                                                                                                                                                                                                                                                                                                                                                                      |  |                                                                                                                                                                                                                                                              |                                |
| 13 |                                  |    |                                                                                                                                                                                                                                                                                                                                                                                                                                                                                                                                                                      |  |                                                                                                                                                                                                                                                              |                                |
| 14 |                                  |    |                                                                                                                                                                                                                                                                                                                                                                                                                                                                                                                                                                      |  |                                                                                                                                                                                                                                                              |                                |
| 15 | Data access and cleaning methods |    | ..                                                                                                                                                                                                                                                                                                                                                                                                                                                                                                                                                                   |  | RECORD 12.1: Authors should describe the extent to which the investigators had access to the database population used to create the study population.<br><br>RECORD 12.2: Authors should provide information on the data cleaning methods used in the study. | Lines 104-111<br>Lines 441-446 |
| 16 |                                  |    |                                                                                                                                                                                                                                                                                                                                                                                                                                                                                                                                                                      |  |                                                                                                                                                                                                                                                              |                                |
| 17 |                                  |    |                                                                                                                                                                                                                                                                                                                                                                                                                                                                                                                                                                      |  |                                                                                                                                                                                                                                                              |                                |
| 18 |                                  |    |                                                                                                                                                                                                                                                                                                                                                                                                                                                                                                                                                                      |  |                                                                                                                                                                                                                                                              |                                |
| 19 |                                  |    |                                                                                                                                                                                                                                                                                                                                                                                                                                                                                                                                                                      |  |                                                                                                                                                                                                                                                              |                                |
| 20 |                                  |    |                                                                                                                                                                                                                                                                                                                                                                                                                                                                                                                                                                      |  |                                                                                                                                                                                                                                                              |                                |
| 21 |                                  |    |                                                                                                                                                                                                                                                                                                                                                                                                                                                                                                                                                                      |  |                                                                                                                                                                                                                                                              |                                |
| 22 |                                  |    |                                                                                                                                                                                                                                                                                                                                                                                                                                                                                                                                                                      |  |                                                                                                                                                                                                                                                              |                                |
| 23 |                                  |    |                                                                                                                                                                                                                                                                                                                                                                                                                                                                                                                                                                      |  |                                                                                                                                                                                                                                                              |                                |
| 24 |                                  |    |                                                                                                                                                                                                                                                                                                                                                                                                                                                                                                                                                                      |  |                                                                                                                                                                                                                                                              |                                |
| 25 |                                  |    |                                                                                                                                                                                                                                                                                                                                                                                                                                                                                                                                                                      |  |                                                                                                                                                                                                                                                              |                                |
| 26 |                                  |    |                                                                                                                                                                                                                                                                                                                                                                                                                                                                                                                                                                      |  |                                                                                                                                                                                                                                                              |                                |
| 27 |                                  |    |                                                                                                                                                                                                                                                                                                                                                                                                                                                                                                                                                                      |  |                                                                                                                                                                                                                                                              |                                |
| 28 |                                  |    |                                                                                                                                                                                                                                                                                                                                                                                                                                                                                                                                                                      |  |                                                                                                                                                                                                                                                              |                                |
| 29 |                                  |    |                                                                                                                                                                                                                                                                                                                                                                                                                                                                                                                                                                      |  |                                                                                                                                                                                                                                                              |                                |
| 30 |                                  |    |                                                                                                                                                                                                                                                                                                                                                                                                                                                                                                                                                                      |  |                                                                                                                                                                                                                                                              |                                |
| 31 |                                  |    |                                                                                                                                                                                                                                                                                                                                                                                                                                                                                                                                                                      |  |                                                                                                                                                                                                                                                              |                                |
| 32 |                                  |    |                                                                                                                                                                                                                                                                                                                                                                                                                                                                                                                                                                      |  |                                                                                                                                                                                                                                                              |                                |
| 33 |                                  |    |                                                                                                                                                                                                                                                                                                                                                                                                                                                                                                                                                                      |  |                                                                                                                                                                                                                                                              |                                |
| 34 |                                  |    |                                                                                                                                                                                                                                                                                                                                                                                                                                                                                                                                                                      |  |                                                                                                                                                                                                                                                              |                                |
| 35 |                                  |    |                                                                                                                                                                                                                                                                                                                                                                                                                                                                                                                                                                      |  |                                                                                                                                                                                                                                                              |                                |
| 36 |                                  |    |                                                                                                                                                                                                                                                                                                                                                                                                                                                                                                                                                                      |  |                                                                                                                                                                                                                                                              |                                |
| 37 |                                  |    |                                                                                                                                                                                                                                                                                                                                                                                                                                                                                                                                                                      |  |                                                                                                                                                                                                                                                              |                                |
| 38 |                                  |    |                                                                                                                                                                                                                                                                                                                                                                                                                                                                                                                                                                      |  |                                                                                                                                                                                                                                                              |                                |
| 39 |                                  |    |                                                                                                                                                                                                                                                                                                                                                                                                                                                                                                                                                                      |  |                                                                                                                                                                                                                                                              |                                |
| 40 |                                  |    |                                                                                                                                                                                                                                                                                                                                                                                                                                                                                                                                                                      |  |                                                                                                                                                                                                                                                              |                                |
| 41 |                                  |    |                                                                                                                                                                                                                                                                                                                                                                                                                                                                                                                                                                      |  |                                                                                                                                                                                                                                                              |                                |
| 42 |                                  |    |                                                                                                                                                                                                                                                                                                                                                                                                                                                                                                                                                                      |  |                                                                                                                                                                                                                                                              |                                |
| 43 |                                  |    |                                                                                                                                                                                                                                                                                                                                                                                                                                                                                                                                                                      |  |                                                                                                                                                                                                                                                              |                                |
| 44 |                                  |    |                                                                                                                                                                                                                                                                                                                                                                                                                                                                                                                                                                      |  |                                                                                                                                                                                                                                                              |                                |
| 45 |                                  |    |                                                                                                                                                                                                                                                                                                                                                                                                                                                                                                                                                                      |  |                                                                                                                                                                                                                                                              |                                |
| 46 |                                  |    |                                                                                                                                                                                                                                                                                                                                                                                                                                                                                                                                                                      |  |                                                                                                                                                                                                                                                              |                                |
| 47 |                                  |    |                                                                                                                                                                                                                                                                                                                                                                                                                                                                                                                                                                      |  |                                                                                                                                                                                                                                                              |                                |

|                  |    |                                                                                                                                                                                                                                                                                                                                                 |  |                                                                                                                                                                                                                                                                                                                    |               |
|------------------|----|-------------------------------------------------------------------------------------------------------------------------------------------------------------------------------------------------------------------------------------------------------------------------------------------------------------------------------------------------|--|--------------------------------------------------------------------------------------------------------------------------------------------------------------------------------------------------------------------------------------------------------------------------------------------------------------------|---------------|
|                  |    |                                                                                                                                                                                                                                                                                                                                                 |  | study included person-level, institutional-level, or other data linkage across two or more databases. The methods of linkage and methods of linkage quality evaluation should be provided.                                                                                                                         | n/a           |
| <b>Results</b>   |    |                                                                                                                                                                                                                                                                                                                                                 |  |                                                                                                                                                                                                                                                                                                                    |               |
| Participants     | 13 | (a) Report the numbers of individuals at each stage of the study ( <i>e.g.</i> , numbers potentially eligible, examined for eligibility, confirmed eligible, included in the study, completing follow-up, and analysed)<br>(b) Give reasons for non-participation at each stage.<br>(c) Consider use of a flow diagram                          |  | RECORD 13.1: Describe in detail the selection of the persons included in the study ( <i>i.e.</i> , study population selection) including filtering based on data quality, data availability and linkage. The selection of included persons can be described in the text and/or by means of the study flow diagram. | Lines 211-220 |
| Descriptive data | 14 | (a) Give characteristics of study participants ( <i>e.g.</i> , demographic, clinical, social) and information on exposures and potential confounders<br>(b) Indicate the number of participants with missing data for each variable of interest<br>(c) <i>Cohort study</i> - summarise follow-up time ( <i>e.g.</i> , average and total amount) |  |                                                                                                                                                                                                                                                                                                                    | Lines 211-220 |
| Outcome data     | 15 | <i>Cohort study</i> - Report numbers of outcome events or summary measures over time<br><i>Case-control study</i> - Report numbers in each exposure category, or summary measures of exposure<br><i>Cross-sectional study</i> - Report numbers of outcome events or                                                                             |  |                                                                                                                                                                                                                                                                                                                    | Lines 222-332 |

|                                                                                           |                |                  |                                                                                                                                                                                                                                                                                                                                                                                                                 |                                                                                                                                                                                                                                                                                                          |               |
|-------------------------------------------------------------------------------------------|----------------|------------------|-----------------------------------------------------------------------------------------------------------------------------------------------------------------------------------------------------------------------------------------------------------------------------------------------------------------------------------------------------------------------------------------------------------------|----------------------------------------------------------------------------------------------------------------------------------------------------------------------------------------------------------------------------------------------------------------------------------------------------------|---------------|
|                                                                                           |                | summary measures |                                                                                                                                                                                                                                                                                                                                                                                                                 |                                                                                                                                                                                                                                                                                                          |               |
| 1<br>2<br>3<br>4<br>5<br>6<br>7<br>8<br>9<br>10<br>11<br>12<br>13<br>14<br>15<br>16<br>17 | Main results   | 16               | (a) Give unadjusted estimates and, if applicable, confounder-adjusted estimates and their precision (e.g., 95% confidence interval). Make clear which confounders were adjusted for and why they were included<br>(b) Report category boundaries when continuous variables were categorized<br>(c) If relevant, consider translating estimates of relative risk into absolute risk for a meaningful time period |                                                                                                                                                                                                                                                                                                          | Lines 222-309 |
| 18<br>19<br>20<br>21                                                                      | Other analyses | 17               | Report other analyses done—e.g., analyses of subgroups and interactions, and sensitivity analyses                                                                                                                                                                                                                                                                                                               |                                                                                                                                                                                                                                                                                                          | Lines 307-309 |
| <b>Discussion</b>                                                                         |                |                  |                                                                                                                                                                                                                                                                                                                                                                                                                 |                                                                                                                                                                                                                                                                                                          |               |
| 23<br>24<br>25                                                                            | Key results    | 18               | Summarise key results with reference to study objectives                                                                                                                                                                                                                                                                                                                                                        |                                                                                                                                                                                                                                                                                                          | Lines 325-334 |
| 26<br>27<br>28<br>29<br>30<br>31<br>32<br>33<br>34<br>35                                  | Limitations    | 19               | Discuss limitations of the study, taking into account sources of potential bias or imprecision. Discuss both direction and magnitude of any potential bias                                                                                                                                                                                                                                                      | RECORD 19.1: Discuss the implications of using data that were not created or collected to answer the specific research question(s). Include discussion of misclassification bias, unmeasured confounding, missing data, and changing eligibility over time, as they pertain to the study being reported. | Lines 409-421 |
| 36<br>37<br>38<br>39<br>40<br>41<br>42<br>43<br>44                                        | Interpretation | 20               | Give a cautious overall interpretation of results considering objectives, limitations, multiplicity of analyses, results from similar studies, and other relevant evidence                                                                                                                                                                                                                                      |                                                                                                                                                                                                                                                                                                          | Lines 335-405 |

|                                        |                                                           |    |                                                                                                                                                               |  |                                                                                                                                                          |                        |
|----------------------------------------|-----------------------------------------------------------|----|---------------------------------------------------------------------------------------------------------------------------------------------------------------|--|----------------------------------------------------------------------------------------------------------------------------------------------------------|------------------------|
| 1<br>2<br>3                            | Generalisability                                          | 21 | Discuss the generalisability (external validity) of the study results                                                                                         |  |                                                                                                                                                          | Lines 406-409, 402-429 |
| 4                                      | <b>Other Information</b>                                  |    |                                                                                                                                                               |  |                                                                                                                                                          |                        |
| 5<br>6<br>7<br>8<br>9                  | Funding                                                   | 22 | Give the source of funding and the role of the funders for the present study and, if applicable, for the original study on which the present article is based |  |                                                                                                                                                          | Lines 458-461          |
| 10<br>11<br>12<br>13<br>14<br>15<br>16 | Accessibility of protocol, raw data, and programming code |    | ..                                                                                                                                                            |  | RECORD 22.1: Authors should provide information on how to access any supplemental information such as the study protocol, raw data, or programming code. | Lines 441-446          |

17  
18 \*Reference: Benchimol EI, Smeeth L, Guttman A, Harron K, Moher D, Petersen I, Sørensen HT, von Elm E, Langan SM, the RECORD Working  
19 Committee. The REporting of studies Conducted using Observational Routinely-collected health Data (RECORD) Statement. *PLoS Medicine* 2015;  
20 in press.

21  
22 \*Checklist is protected under Creative Commons Attribution ([CC BY](https://creativecommons.org/licenses/by/4.0/)) license.  
23  
24  
25  
26  
27  
28  
29  
30  
31  
32  
33  
34  
35  
36  
37  
38  
39  
40  
41  
42  
43  
44

# BMJ Open

## Diabetes mellitus monitoring and control among adults in Australian general practice: a national retrospective cohort study

|                                 |                                                                                                                                                                                                                                                                                                                                                                                                                                                                                                                                                                                                  |
|---------------------------------|--------------------------------------------------------------------------------------------------------------------------------------------------------------------------------------------------------------------------------------------------------------------------------------------------------------------------------------------------------------------------------------------------------------------------------------------------------------------------------------------------------------------------------------------------------------------------------------------------|
| Journal:                        | <i>BMJ Open</i>                                                                                                                                                                                                                                                                                                                                                                                                                                                                                                                                                                                  |
| Manuscript ID                   | bmjopen-2022-069875.R1                                                                                                                                                                                                                                                                                                                                                                                                                                                                                                                                                                           |
| Article Type:                   | Original research                                                                                                                                                                                                                                                                                                                                                                                                                                                                                                                                                                                |
| Date Submitted by the Author:   | 22-Mar-2023                                                                                                                                                                                                                                                                                                                                                                                                                                                                                                                                                                                      |
| Complete List of Authors:       | Zheng, Mingyue; The University of Adelaide, Discipline of General Practice, Adelaide Medical School<br>Bernardo, Carla; The University of Adelaide, Discipline of General Practice, Adelaide Medical School<br>Stocks, Nigel; The University of Adelaide, Discipline of General Practice, Adelaide Medical School<br>Hu, Peng; Chengdu University of Traditional Chinese Medicine, School of Health and Rehabilitation<br>Gonzalez-Chica, David; The University of Adelaide, Discipline of General Practice, Adelaide Medical School; The University of Adelaide, Adelaide Rural Clinical School |
| <b>Primary Subject Heading</b>: | Epidemiology                                                                                                                                                                                                                                                                                                                                                                                                                                                                                                                                                                                     |
| Secondary Subject Heading:      | Diabetes and endocrinology                                                                                                                                                                                                                                                                                                                                                                                                                                                                                                                                                                       |
| Keywords:                       | DIABETES & ENDOCRINOLOGY, PUBLIC HEALTH, Primary Health Care, EPIDEMIOLOGY                                                                                                                                                                                                                                                                                                                                                                                                                                                                                                                       |
|                                 |                                                                                                                                                                                                                                                                                                                                                                                                                                                                                                                                                                                                  |

SCHOLARONE™  
Manuscripts



I, the Submitting Author has the right to grant and does grant on behalf of all authors of the Work (as defined in the below author licence), an exclusive licence and/or a non-exclusive licence for contributions from authors who are: i) UK Crown employees; ii) where BMJ has agreed a CC-BY licence shall apply, and/or iii) in accordance with the terms applicable for US Federal Government officers or employees acting as part of their official duties; on a worldwide, perpetual, irrevocable, royalty-free basis to BMJ Publishing Group Ltd ("BMJ") its licensees and where the relevant Journal is co-owned by BMJ to the co-owners of the Journal, to publish the Work in this journal and any other BMJ products and to exploit all rights, as set out in our [licence](#).

The Submitting Author accepts and understands that any supply made under these terms is made by BMJ to the Submitting Author unless you are acting as an employee on behalf of your employer or a postgraduate student of an affiliated institution which is paying any applicable article publishing charge ("APC") for Open Access articles. Where the Submitting Author wishes to make the Work available on an Open Access basis (and intends to pay the relevant APC), the terms of reuse of such Open Access shall be governed by a Creative Commons licence – details of these licences and which [Creative Commons](#) licence will apply to this Work are set out in our licence referred to above.

Other than as permitted in any relevant BMJ Author's Self Archiving Policies, I confirm this Work has not been accepted for publication elsewhere, is not being considered for publication elsewhere and does not duplicate material already published. I confirm all authors consent to publication of this Work and authorise the granting of this licence.



1  
2  
3 1 **Diabetes mellitus monitoring and control among adults in Australian general practice: a**  
4  
5 2 **national retrospective cohort study**  
6  
7 3

9 4 Mingyue Zheng<sup>1</sup>, Carla De Oliveira Bernardo<sup>1</sup>, Nigel Stocks<sup>1</sup>, Peng Hu<sup>2</sup>, David Gonzalez-  
10  
11 Chica<sup>1,3</sup>  
12

13  
14 6 <sup>1</sup> Discipline of General Practice, Adelaide Medical School, University of Adelaide, Adelaide,  
15  
16 7 Australia.  
17

18  
19 8 <sup>2</sup> School of Health and Rehabilitation, Chengdu University of Traditional Chinese Medicine,  
20  
21 9 Chengdu, China.  
22

23  
24  
25 10 <sup>3</sup> Adelaide Rural Clinical School, University of Adelaide, Adelaide, Australia.  
26  
27

28  
29  
30 12 Corresponding author: David Gonzalez-Chica  
31

32 13 E-mail: [david.gonzalez@adelaide.edu.au](mailto:david.gonzalez@adelaide.edu.au) (DGC)  
33  
34  
35 14

**ABSTRACT**

**Objectives:** This study investigated whether the monitoring and control of clinical parameters are better among patients with newly compared to past recorded diabetes diagnosis.

**Design:** Retrospective cohort study.

**Setting:** MedicineInsight, a national general practice database in Australia.

**Participants:** 101,875 'regular' adults aged 18+ years with past (2015-2016) and 9,236 with newly recorded (2017) diabetes diagnosis.

**Main outcome measures:** Two different groups of outcomes were assessed in 2018. The first group of outcomes was the proportion of patients with clinical parameters (i.e., HbA1c, blood pressure [BP], total cholesterol, low-density lipoprotein cholesterol, high-density lipoprotein cholesterol, triglycerides, estimated glomerular filtration rate-eGFR, albumin-to-creatinine ratio) monitored at least once in 2018. The second group of outcomes were those related to diabetes control in 2018 (HbA1c  $\leq$ 7.0%, (BP)  $\leq$ 140/90mmHg, total cholesterol  $<$ 4.0mmol/L, and LDL-C  $<$ 2.0mmol/L). Adjusted odds ratios (OR<sub>adj</sub>) and adjusted probabilities (%) were obtained based on logistic regression models adjusted for practice variables and patients' sociodemographic and clinical characteristics.

**Results:** The study included 111,111 patients (51.7% males; mean age 65.3 $\pm$ 15.0 years) with recorded diabetes diagnosis (11.0% of all 1,007,714 adults in the database). HbA1c was monitored in 39.2% (95%CI 36.9;41.6) of patients with newly and 45.2% (95%CI 42.6;47.8) with past recorded diabetes (OR<sub>adj</sub> 0.78, 95%CI 0.73;0.82). HbA1c control was achieved by 78.4% (95%CI 76.7;80.0) and 54.4% (95%CI 53.4;55.4) of monitored patients with newly or past recorded diabetes, respectively (OR<sub>adj</sub> 3.11, 95%CI 2.82;3.39). Less than 20% of patients with newly or past recorded diabetes had their HbA1c, BP, and total cholesterol levels controlled (OR<sub>adj</sub> 1.08, 95%CI 0.97;1.21).

1  
2  
3 39 **Conclusions:** The monitoring of clinical parameters was lower among patients with newly than  
4  
5 40 past recorded diabetes. However, diabetes control was similarly low in both groups, with only  
6  
7 41 one in five monitored patients achieving control of all clinical parameters.  
8

9 42 **Keywords:** Epidemiological Monitoring, Evidence-Based Practice, Population Health  
10  
11  
12 43

#### 14 44 **Strengths and limitations of this study**

- 16 45 ● This retrospective cohort used a large sample of patients attending primary healthcare  
17  
18 46 services across all Australian states and territories.
- 21 47 ● A wide range of sociodemographic and clinical variables related to diabetes monitoring  
22  
23 48 and control were included for adjustment.
- 25 49 ● Lifestyle variables were not included for adjustment, as they are not consistently recorded  
26  
27 50 in the electronic medical records.
- 30 51 ● Patients may have had their diabetes parameters monitored somewhere else (e.g., different  
31  
32 52 practices or by specialists).

## INTRODUCTION

Diabetes mellitus is a lifelong disease that requires regular monitoring and control to reduce the risk of diabetes-related complications.[1-5] Micro- and macrovascular complications of uncontrolled diabetes (e.g., hypertension, dyslipidaemia, chronic kidney disease-CKD, cardiovascular disease-CVD) increase the health burden worldwide.[6] Blood glucose control is the most critical clinical goal of diabetes management, but other clinical variables also require regular monitoring.[3] The Royal Australian College of General Practitioners (RACGP) guidelines recommend patients with diabetes should have their haemoglobin A1c (HbA1c), blood pressure (BP), and lipid levels evaluated annually to improve management and control of these clinical parameters.[7] Treatment options may vary depending on individual characteristics (e.g., age, gender, presence of comorbidities)[7, 8] and the stage of diabetes progression (i.e. recent or past diagnosis, presence of diabetes complications).[9]

Maintaining optimal levels of diabetes control with a combination of drug monotherapy and lifestyle changes is often possible for several years, after which a combination therapy may be necessary. The evaluation and modification of treatment plans in diabetes hinge on the information obtained from close monitoring of clinical parameters.[10] However, gaps between real-world practice and guideline recommendations for diabetes management have been reported worldwide.[4, 11-13] For instance, a survey of 305 primary care physicians in the US showed that only 38% of clinicians use guidelines in the management of diabetes.[11]

A systematic review of 123 Australian studies found that approximately 50% of patients with diabetes received 'standard care' (i.e., assessment of HbA1c, BP, lipids, weight, eye health, foot health). Among those assessed, 40-60% met management targets for HbA1c, BP, or lipid levels, but the study did not report the proportion that had all three parameters under control.[13] Most studies included in that review used electronic health records (EHRs) to

1  
2  
3 77 investigate diabetes control. However, these studies also tended to source data from specialised  
4  
5 78 centres rather than primary healthcare settings, and used non-representative samples, hindering  
6  
7 79 the generalisability of the results at a national level. Additionally, other potential determinants  
8  
9 80 of diabetes management and control (e.g., sociodemographic and clinical variables) were not  
10  
11 81 widely investigated. Despite these limitations, figures in the review were consistent with  
12  
13 82 measured data from the Australian Health Survey (AHS) (2011-2012), which reported that 54.7%  
14  
15 83 of adults with known diabetes met HbA1c targets, 39% met recommended BP levels, and 38%,  
16  
17 84 total cholesterol targets.[14]

20  
21 85 Despite concerns about the completeness and feasibility of using EHR-based primary care  
22  
23 86 databases in research, studies conducted in countries such as the United States, Canada, the  
24  
25 87 United Kingdom, France, Sweden, India and Australia have shown EHRs can provide accurate  
26  
27 88 information on diabetes prevalence,[15-17] management and control.[13, 18-20] EHR-based  
28  
29 89 research can improve diabetes management without increasing overall treatment costs.[21, 22]  
30  
31 90 Moreover, EHR databases minimise self-report bias by providing information on doctor-  
32  
33 91 reported diagnoses, objective laboratory results, and prescribed medications.[15, 16, 23]

34  
35  
36  
37  
38 92 Thus, this study used retrospective data from a national general practice database to investigate  
39  
40 93 if (1) the monitoring of clinical parameters for diabetes management (HbA1c, BP, total  
41  
42 94 cholesterol, low-density lipoprotein cholesterol [LDL-C], high-density lipoprotein cholesterol,  
43  
44 95 triglycerides [HDL], estimated glomerular filtration rate [eGFR], albumin-to-creatinine ratio  
45  
46 96 [ACR]) is better among patients with newly than past recorded diabetes diagnosis, and (2) the  
47  
48 97 proportion of those monitored who achieved diabetes control (i.e., HbA1c, BP, total cholesterol,  
49  
50 98 LDL-C) is higher in patients with newly compared to those with past recorded diabetes  
51  
52 99 diagnosis.  
53  
54  
55  
56  
57  
58  
59  
60

## **METHODS**

### **Data source**

We used retrospective data from an open cohort database (MedicineInsight) that includes de-identified EHRs from approximately 662 general practices (8.2% of all Australian practices) and over 2,700 general practitioners (GPs) across Australia.[23] Details of data extraction and database characteristics have been published elsewhere.[23] Although practices in MedicineInsight were selected using a non-random process, all Australian states and territories, urban and rural settings and socioeconomic settings are represented in the database. Diagnostic algorithms used for identifying patients with chronic disease using MedicineInsight have been validated, showing sensitivity of 89% against the recording of diabetes in the original EHR.[16]

### **Study sample**

This study was reported according to the REporting of studies Conducted using Observational Routinely-collected Data (RECORD) statement.[20] Only data from practices with regular data provision (i.e., no gap of more than 6-weeks in data provision in the previous two years) was included. The sample was adults (18+ years) who regularly attended the practice (i.e., those with at least one consultation per year between 2015 and 2018) and who had a diagnosis of diabetes mellitus (either type 1 or type 2). Data from consultations between January 2015 and December 2017 were used to identify the level of exposure: patients with past (i.e., diabetes diagnosis recorded in 2015 or 2016) or newly recorded diabetes (i.e., first diagnosis recorded in 2017, but not during appointments in 2015 or 2016). The outcome was assessed using data from January to December 2018, considering all recordings of clinical parameters related to diabetes monitoring and control in that year.[7]

1  
2  
3 122 Three fields ('diagnosis', 'reason for encounter', 'reason for prescription') were initially  
4  
5 123 searched to identify patients with recorded diabetes diagnoses. The original search was based  
6  
7 124 on the methods for data extraction used by MedicineInsight.[16, 23] It included standard  
8  
9 125 clinical terminology, misspellings, and abbreviations, and then expanded to include prescribed  
10  
11 126 medications and laboratory results. Using as much information as possible from EHRs (i.e.,  
12  
13 127 observations, medications, diagnostic information) can provide a more accurate picture for  
14  
15 128 identifying diabetes.[24] Besides, including laboratory results from EHRs are associated with  
16  
17 129 higher rates of diabetes ascertainment.[25, 26]

20  
21 130 Patients were classified as having past recorded diabetes (i.e., past diabetes) if between January  
22  
23 131 2015 and December 2016: (1) 'diabetes' was recorded in two different fields; or (2) antidiabetic  
24  
25 132 medications were prescribed [Anatomical Therapeutic Chemical A10A or A10B;[27]  
26  
27 133 metformin was considered only in the absence of polycystic ovary syndrome diagnosis]; or (3)  
28  
29 134 a diabetes diagnosis was recorded only once but there was at least one recorded laboratory  
30  
31 135 result (fasting blood glucose, HbA1c or 2-hour oral glucose tolerance test) above the diabetes  
32  
33 136 diagnosis threshold within the same timeframe.[7] Patients were classified as having newly  
34  
35 137 recorded diabetes (i.e., recent diabetes) if: (1) they did not meet the criteria for past recorded  
36  
37 138 diabetes (i.e. attended the practice in 2015 and 2016 but diabetes was not recorded) and (2)  
38  
39 139 between January 2017 and December 2017 they presented any of the three criteria mentioned  
40  
41 140 above for diabetes diagnosis (i.e., 'diabetes' recorded in two fields, antidiabetic medications  
42  
43 141 were prescribed OR 'diabetes' was recorded once only but there was at least one abnormal  
44  
45 142 glycaemic result recorded in 2017).

## 51 52 143 **Outcomes**

53  
54  
55 144 The outcome was assessed considering data related to diabetes monitoring and control reported  
56  
57 145 between January and December 2018. The first group of outcomes was the proportion of  
58  
59  
60

1  
2  
3 146 patients with diabetes who had their clinical parameters for diabetes management monitored at  
4  
5 147 least once in 2018 (i.e., HbA1c, BP, total cholesterol, LDL-C, HDL-C, triglycerides, eGFR, or  
6  
7 148 ACR).[7] These clinical parameters were obtained from the fields ‘observations’ and  
8  
9 149 ‘laboratory results’ using Logical Observation Identifiers Names and Codes.[28]

10  
11  
12 150 According to the RACGP guidelines, patients with diabetes should achieve recommended  
13  
14 151 targets for all clinical parameters (i.e. HbA1c, lipids [total cholesterol, HDL-C, LDL-C, non-  
15  
16 152 HDL, triglycerides], BP, and urine albumin excretion).[7] However, three key parameters  
17  
18 153 (HbA1c, BP, and total cholesterol) can be used to define ‘well-controlled’ diabetes, since they  
19  
20 154 indicate that patients can comprehensively manage their diabetes and reduce the risk of  
21  
22 155 complications.[12, 13] Therefore, the second group of outcomes was the proportion of patients  
23  
24 156 that achieved in 2018, among those checked, generally recommended targets (HbA1c $\leq$ 7.0%,  
25  
26 157 BP $\leq$ 140/90mmHg, and total cholesterol  $<$ 4.0mmol/L). Considering LDL-C is also commonly  
27  
28 158 used to monitor cardiovascular risk[9], we performed additional analysis reporting the  
29  
30 159 proportion of patients who achieved well-controlled LDL-C ( $<$ 2.0mmol/L). When multiple  
31  
32 160 results were reported in 2018 for the same parameter and patient, the mean of these results was  
33  
34 161 estimated and used for analysis.

35  
36  
37  
38  
39  
40 162 ‘Well-controlled’ diabetes was then explored using two different approaches. First, we  
41  
42 163 analysed each clinical parameter as a different outcome: (1) controlled HbA1c, (2) controlled  
43  
44 164 BP, or (3) controlled total cholesterol or LDL-C. Second, based on whether each of these three  
45  
46 165 parameters was controlled or not, we created an outcome variable with eight categories to  
47  
48 166 explore the most frequent combination of parameters that were under control: (1) none  
49  
50 167 controlled, (2) HbA1c only, (3) BP only, (4) total cholesterol only, (5) HbA1c and BP  
51  
52 168 controlled, (6) HbA1c and total cholesterol controlled, (7) BP and total cholesterol controlled,  
53  
54 169 or (8) all controlled. The same combination was analysed considering LDL-C rather than total  
55  
56 170 cholesterol and results were reported as supplementary material.



## 171 **Covariates**

172 Covariates included a group of sociodemographic and cardiovascular risk factors/history of  
173 CVD that may affect diabetes control.[5, 29] Practice data included practice remoteness (major  
174 cities, inner regional, or outer regional/remote/very remote] and practice Index of Relative  
175 Socioeconomic Advantage and Disadvantage (IRSAD quintiles). Remoteness and IRSAD  
176 were defined based on postcodes. Remoteness is determined according to the population size  
177 and average distance to services, while IRSAD is an area-level measure of socioeconomic  
178 status based on combined indicators (i.e., household income, education, and working status).  
179 Higher IRSAD scores indicate a more advantaged area.[30] Patient variables included age (18-  
180 39, 40-64, 65+), gender (females, males), smoking status (smoker, ex-smoker or non-smoker),  
181 recorded history of hypertension, and recorded history of CVD (including heart failure,  
182 ischemic heart disease, or stroke), dyslipidaemia, CKD, liver disease, and depressive symptoms  
183 during 2015-2017. Details on the data extraction methods for these variables have been  
184 published elsewhere.[16, 31]

## 185 **Statistical analysis**

186 All analyses were performed in Stata 16.1 (StataCorp, Texas, USA), considering the practices  
187 as clusters, using robust standard errors and conditioned to the number of visits to the practice.

188 The distribution of sociodemographic and clinical characteristics among patients with past or  
189 newly recorded diabetes were presented as proportions with their corresponding 95%  
190 confidence intervals (95%CI) (categorical variables), or as means with their standard deviation  
191 or median with their interquartile range (numerical variables).

192 Logistic regression models were used to assess differences in diabetes monitoring or diabetes  
193 control in 2018 (binary outcomes: each parameter controlled) between patients with past (i.e.  
194 diagnosis recorded in 2015 or 2016, reference group) or newly recorded diabetes (i.e. first

1  
2  
3 195 diagnosis recorded in 2017). All results were adjusted for differences between these two groups  
4  
5 196 in terms of practice characteristics (remoteness, IRSAD quintiles), patient sociodemographics  
6  
7 197 (gender, age), or clinical characteristics (smoking status, history of hypertension, CVD, CKD,  
8  
9 198 dyslipidaemia, liver disease, and depressive symptoms. We reported adjusted odds ratios  
10  
11 (OR<sub>adj</sub>) with their corresponding 95%CI, following recommendations of the American  
12  
13 Statistical Association.[32] Furthermore, results from the adjusted logistic regression models  
14  
15 200 were also used to estimate adjusted predicted probabilities (i.e., adjusted proportions) of the  
16  
17 201 investigated outcomes using the command ‘margins’ in Stata.  
18  
19 202

20  
21 203 Multinomial logistic regression models were used to compare whether the most frequent  
22  
23 204 combination of parameters under control differed between patients with past or newly recorded  
24  
25 205 diabetes, using a similar approach for adjustment and then obtaining the OR<sub>adj</sub> and adjusted  
26  
27 206 probabilities for each category of the outcome.

## 30 207 **Patient and Public Involvement**

31  
32  
33  
34 208 No patient involved.  
35  
36

## 37 209 **RESULTS**

### 40 210 **Population Characteristics**

41  
42  
43  
44  
45 211 The database included 1,007,714 regular patients (at least one visit per year between 2015 and  
46  
47 212 2018) aged 18+ years attending 541 practices (Figure 1 and table 1). Of these, 111,111  
48  
49 213 individuals (11.0%) had recorded diabetes diagnosis (51.7% males; mean age 65.3±15.0 years):  
50  
51 214 101,875 with past and 9,236 with newly recorded diabetes. Table 1 shows that patients with  
52  
53 215 past recorded diabetes were older (mean 65.9±14.6 vs. 58.1±17.1 years), and had a higher  
54  
55 216 proportion of males (52.4% vs. 44.0%), and history of CKD (4.7% vs. 2.9%) than those with  
56  
57  
58 217 newly recorded diabetes. However, diagnosis of hypertension (35.0% vs. 36.8%),  
59  
60

218 dyslipidaemia (17.6% vs. 20.2%), or depressive symptoms (18.4% vs. 20.9%) was less frequent  
 219 in patients with past recorded diabetes. The distribution according to remoteness, IRSAD,  
 220 smoking status, history of CVD or history of liver disease was similar in both groups.

221 <Figure 1 here>

222 **Table 1. Sociodemographic and clinical profile of regular patients<sup>†</sup> aged 18+ years in the**  
 223 **database.**

| Variables                                  | All adults in<br>MedicineInsight<br>(N=1,007,714) | Patients with diabetes                                |                                                      |
|--------------------------------------------|---------------------------------------------------|-------------------------------------------------------|------------------------------------------------------|
|                                            |                                                   | Past recorded<br>diabetes<br>(n=101,875)<br>% (95%CI) | Newly recorded<br>diabetes<br>(n=9,236)<br>% (95%CI) |
| <b>Practice characteristics</b>            |                                                   |                                                       |                                                      |
| <b>Geographical area of GP</b>             |                                                   |                                                       |                                                      |
| Major cities                               | 63.8 (59.4–68.2)                                  | 59.4 (54.6–64.2)                                      | 62.3 (57.2–67.4)                                     |
| Inner regional                             | 24.8 (20.6–28.9)                                  | 27.4 (22.8–32.1)                                      | 25.0 (20.4–29.7)                                     |
| Outer regional/remote/very remote          | 11.4 (8.5–14.4)                                   | 13.2 (9.8–16.5)                                       | 12.6 (9.1–16.0)                                      |
| <b>GP IRSAD</b>                            |                                                   |                                                       |                                                      |
| More disadvantaged                         | 33.8 (32.4–35.2)                                  | 39.2 (34.0–44.4)                                      | 38.3 (33.0–43.7)                                     |
| Middle                                     | 23.7 (22.4–25.1)                                  | 25.0 (20.3–29.6)                                      | 24.6 (19.8–29.4)                                     |
| More advantaged                            | 43.8 (42.5–45.1)                                  | 36.6 (32.1–41.0)                                      | 38.1 (33.5–42.8)                                     |
| <b>Patient's characteristics</b>           |                                                   |                                                       |                                                      |
| <b>Gender</b>                              |                                                   |                                                       |                                                      |
| Male                                       | 40.4 (39.9–40.9)                                  | 52.4 (51.9–53.0)                                      | 44.0 (42.7–45.4)                                     |
| <b>Age, mean ± SD</b>                      |                                                   |                                                       |                                                      |
| Age group (years)                          | 54.0 ± 19.1                                       | 65.9 ± 14.6                                           | 58.1 ± 17.1                                          |
| 18–39                                      | 26.2 (25.1–27.2)                                  | 5.8 (5.4–6.2)                                         | 15.8 (14.6–17.1)                                     |
| 40–64                                      | 40.9 (40.4–41.4)                                  | 34.9 (34.0–35.7)                                      | 43.0 (41.7–44.4)                                     |
| 65+                                        | 33.0 (31.7–34.2)                                  | 59.4 (58.2–60.5)                                      | 41.2 (39.5–42.9)                                     |
| <b>Smoking status</b>                      |                                                   |                                                       |                                                      |
| Smoker                                     | 12.0 (11.6–12.4)                                  | 10.5 (10.1–10.8)                                      | 10.8 (10.0–11.5)                                     |
| <b>History of hypertension</b>             |                                                   |                                                       |                                                      |
| Yes                                        | 19.0 (18.5–19.5)                                  | 35.0 (33.9–36.2)                                      | 36.8 (35.4–38.3)                                     |
| <b>History of CVD</b>                      |                                                   |                                                       |                                                      |
| Yes                                        | 5.3 (5.2–5.4)                                     | 13.2 (12.8–13.5)                                      | 12.5 (11.7–13.3)                                     |
| <b>History of dyslipidaemia</b>            |                                                   |                                                       |                                                      |
| Yes                                        | 11.0 (10.5–11.4)                                  | 17.6 (16.7–18.6)                                      | 20.2 (19.0–21.3)                                     |
| <b>History of CKD</b>                      |                                                   |                                                       |                                                      |
| Yes                                        | 1.3 (1.2–1.4)                                     | 4.7(4.3–5.1)                                          | 2.9 (2.5–3.4)                                        |
| <b>History of liver disease</b>            |                                                   |                                                       |                                                      |
| Yes                                        | 0.2 (0.2–0.2)                                     | 0.5 (0.5–0.6)                                         | 0.6 (0.5–0.8)                                        |
| <b>History of depressive symptoms</b>      |                                                   |                                                       |                                                      |
| Yes                                        | 20.7 (20.1–21.4)                                  | 18.4 (17.6–19.1)                                      | 20.9 (19.9–22.0)                                     |
| <b>Consultations in 2018, median (IQR)</b> |                                                   |                                                       |                                                      |
|                                            | 4 (2–8)                                           | 7 (4–13)                                              | 6 (3–11)                                             |

224 GP: General practice; 95%CI: 95% Confidence interval; IRSAD: Index of Relative Socio-economic  
225 Advantage and Disadvantage; IQR: Interquartile range; SD: Standard deviation; CVD: Cardiovascular  
226 diseases, including heart failure, ischemic heart disease, and stroke; CKD: Chronic kidney disease.  
227 All results were adjusted for differences between these two groups in terms of practice characteristics  
228 (remoteness, IRSAD quintiles), patient sociodemographics (gender, age), or clinical characteristics  
229 (smoking status, history of hypertension, CVD, CKD, dyslipidaemia, liver disease, and depressive  
230 symptoms.

231 † People had at least one visit per year between 2015 and 2018.

## 233 **Diabetes Monitoring**

234 Table 2 reports the proportion and  $OR_{adj}$  of individuals who had their clinical parameters  
235 monitored in 2018, according to whether they had past or newly recorded diabetes. The most  
236 frequently monitored parameter was BP (past diabetes, 84.3% [95%CI 83.3;85.3]; newly  
237 diagnosed diabetes, 81.4% [95%CI 80.0;82.8]). The least monitored parameter was ACR (past  
238 diabetes, 17.4% [95%CI 16.8;18.0]; newly recorded diabetes, 13.5% [95%CI 12.6;14.3]).  
239 Although 45.2% (95% CI 42.6;47.8) of those with past diabetes and 39.2% (95%CI 36.9;41.6)  
240 with newly recorded diabetes had their HbA1c levels monitored in 2018 (table 2), an additional  
241 15 percentage points in each group (absolute difference) had their glycaemic parameters  
242 checked through fasting and/or random glucose levels (table S1).

243 Table 2 also shows that  $OR_{adj}$  of monitoring of any parameter (i.e., HbA1c, BP, total cholesterol,  
244 HDL-C, LDL-C, triglycerides, eGFR, or ACR) was lower among patients with newly than past  
245 recorded diabetes, especially HbA1c ( $OR_{adj}$  0.78, 95%CI 0.73;0.82) and ACR ( $OR_{adj}$  0.74,  
246 95%CI 0.69;0.79). Table S2 presents the  $OR_{adj}$  of distribution of patients with all three clinical  
247 parameters nontiered (HbA1c, blood pressure, and total cholesterol) according to  
248 sociodemographic and clinical characteristics among those with past or newly recorded  
249 diabetes.

250

251 **Table 2. Clinical parameters monitored in 2018 according to whether patients had past**  
 252 **(2015–2016) or newly recorded diabetes (2017)**

| Clinical parameters monitored            | Past recorded diabetes<br>(n=101,875) | Newly recorded<br>diabetes (n=9,236) | Adjusted <sup>†</sup> odds<br>ratio (95%CI) |
|------------------------------------------|---------------------------------------|--------------------------------------|---------------------------------------------|
|                                          | % (95%CI)                             | % (95%CI)                            |                                             |
| HbA1c                                    | 45.2 (42.6–47.8)                      | 39.2 (36.9–41.6)                     | 0.78 (0.73–0.82)                            |
| Blood pressure <sup>¶</sup>              | 84.3 (83.3–85.3)                      | 81.4 (80.0–82.8)                     | 0.81 (0.75–0.87)                            |
| Total cholesterol                        | 42.3 (39.8–44.8)                      | 38.9 (36.4–41.4)                     | 0.86 (0.82–0.91)                            |
| HDL-C                                    | 38.0 (35.7–40.2)                      | 34.5 (32.2–36.7)                     | 0.86 (0.81–0.91)                            |
| LDL-C                                    | 35.8 (33.6–37.9)                      | 32.9 (30.5–34.8)                     | 0.87 (0.82–0.92)                            |
| Triglycerides                            | 41.3 (38.9–43.7)                      | 37.8 (35.4–40.1)                     | 0.86 (0.81–0.90)                            |
| Any type of kidney function <sup>#</sup> | 26.9 (26.3–27.5)                      | 25.5 (24.4–26.4)                     | 0.93 (0.88–0.98)                            |
| eGFR                                     | 26.5 (25.9–27.1)                      | 25.1 (24.1–26.2)                     | 0.93 (0.88–0.98)                            |
| ACR                                      | 17.4 (16.8–18.0)                      | 13.5 (12.6–14.3)                     | 0.74 (0.69–0.79)                            |

253 95%CI: 95% Confidence interval; HbA1c: Haemoglobin A1C; HDL-C: High-density lipoprotein  
 254 cholesterol; LDL-C: Low-density lipoprotein cholesterol; eGFR: Estimated glomerular filtration rate;  
 255 ACR: Urine albumin-to-creatinine ratio; CVD: Cardiovascular diseases, including heart failure,  
 256 ischemic heart disease, and stroke; CKD: Chronic kidney disease.

257 <sup>†</sup> Past recorded diabetes was used as the reference category. Results adjusted for differences between  
 258 these two groups in terms of practice characteristics (remoteness, IRSAD quintiles), patient  
 259 sociodemographics (gender, age), and CVD risk factors (smoking status, history of hypertension or  
 260 CVD, CKD, dyslipidaemia, liver disease, and depressive symptoms using logistic regression models.

## 261 Well-controlled Diabetes

263 Table 3 shows the proportion of patients that achieved clinical goals for diabetes management  
 264 in 2018 among those with available results for each of the three key parameters. Patients with  
 265 newly recorded diabetes had higher chance of having their HbA1c controlled than those with  
 266 past diabetes (OR<sub>adj</sub> 3.11, 95%CI 2.82;3.39). Nevertheless, the odds of having diastolic BP  
 267 (OR<sub>adj</sub> 0.72, 95%CI 0.63;0.82), total cholesterol (OR<sub>adj</sub> 0.63, 95%CI 0.57;0.69), and LDL-C  
 268 (OR<sub>adj</sub> 0.58, 95%CI 0.53;0.63) controlled were lower among those with newly recorded  
 269 diagnosis than their peers. Systolic BP control was not different across groups.

271 **Table 3. Clinical parameters controlled in 2018 according to whether patients had past (2015-**  
 272 **2016) or newly recorded diabetes (2017) among those with available results for the three key**  
 273 **parameters (HbA1c, blood pressure, and total cholesterol/LDL-C)**

| Clinical parameter controlled               | Past recorded diabetes | Newly recorded diabetes | Adjusted <sup>†</sup> odds ratio (95%CI) |
|---------------------------------------------|------------------------|-------------------------|------------------------------------------|
|                                             | n=40,008               | n=2,912                 |                                          |
| HbA1c ( $\leq 7.0\%$ or $\leq 53$ mmol/mol) | 54.4 (53.4–55.4)       | 78.4 (76.7–80.0)        | 3.11 (2.82–3.39)                         |
| Systolic blood pressure ( $\leq 140$ mmHg)  | 70.6 (69.5–71.6)       | 71.4 (69.6–73.3)        | 1.04 (0.96–1.14)                         |
| Diastolic blood pressure ( $\leq 90$ mmHg)  | 94.6 (94.2–94.9)       | 92.8 (91.9–93.6)        | 0.72 (0.63–0.82)                         |
| Total cholesterol ( $< 4.0$ mmol/L)         | 43.9 (43.0–44.9)       | 33.8 (31.9–35.6)        | 0.63 (0.57–0.69)                         |
| LDL-C ( $< 2.0$ mmol/L)                     | 47.1 (46.1–48.1)       | 34.7 (32.7–36.6)        | 0.58 (0.53–0.63)                         |

274 95%CI: 95% Confidence interval; HbA1c: Haemoglobin A1c; LDL-C: low-density lipoprotein  
 275 cholesterol; CVD: Cardiovascular diseases, including heart failure, ischemic heart disease, and stroke;  
 276 CKD: Chronic kidney disease.

277 † Past recorded diabetes was used as the reference category. Results adjusted for differences between  
 278 these two groups in terms of practice characteristics (remoteness, IRSAD quintiles), patient  
 279 sociodemographics (gender, age), and CVD risk factors (smoking status, history of hypertension or CVD,  
 280 CKD, dyslipidaemia, liver disease, and depressive symptoms using logistic regression models.

281  
 282  
 283 Table 4 shows the combination of the three key parameters that were more frequently  
 284 controlled in 2018. The proportion of individuals that met the three recommended targets was  
 285 clinically similar, whether they had past (17.4%, 95%CI 16.7;18.1) or newly recorded diabetes  
 286 (18.8%, 95%CI 17.2;20.3). Patients with newly recorded diabetes were more likely to have  
 287 their HbA1c controlled, either alone ( $OR_{adj}$  1.62, 95%CI 1.40;1.87) or in combination with BP  
 288 controlled ( $OR_{adj}$  1.64, 95%CI 1.45;1.86) than their peers. In contrast, the odds of total  
 289 cholesterol being controlled (either alone or with BP) was ~65% lower among those with newly  
 290 recorded diabetes than their counterpart. Analyses using LDL-C rather than total cholesterol  
 291 showed similar results to those presented above (table S3).

The association between sociodemographic and clinical variables with the monitoring of the three key parameters (HbA1c, BP and total cholesterol or LDL-C) are presented as supplementary materials (tables S4 and S5).

**Table 4. Combination of clinical parameters controlled in 2018 according to whether patients had past (2015–2016) or newly recorded diabetes (2017) among those with available results for all three parameters (HbA1c, blood pressure, and total cholesterol)**

| Parameter(s) controlled     | Past recorded diabetes (n= 40,008) |                  | Newly recorded diabetes (n= 2,912) |                  | Adjusted <sup>†</sup> odds ratio (95%CI) |
|-----------------------------|------------------------------------|------------------|------------------------------------|------------------|------------------------------------------|
|                             | n                                  | % (95%CI)        | n                                  | % (95%CI)        |                                          |
| None controlled             | 3,521                              | 8.8 (8.3–9.3)    | 149                                | 5.1 (4.3–5.9)    | 0.54 (0.45–0.66)                         |
| Only HbA1c                  | 3,961                              | 9.9 (9.4–10.4)   | 492                                | 16.9 (15.4–18.3) | 1.62 (1.40–1.87)                         |
| Only BP                     | 6,761                              | 16.9 (16.3–17.5) | 259                                | 8.9 (7.9–9.9)    | 0.49 (0.42–0.57)                         |
| Only total cholesterol      | 2,360                              | 5.9 (5.5–6.2)    | 61                                 | 2.1 (1.6–2.6)    | 0.33 (0.25–0.43)                         |
| HbA1c and BP                | 8,202                              | 20.5 (19.8–21.1) | 1,031                              | 35.4 (33.5–37.3) | 1.64 (1.45–1.86)                         |
| HbA1c and total cholesterol | 2,641                              | 6.6 (6.2–7.0)    | 210                                | 7.2 (6.1–8.4)    | 1.02 (0.84–1.24)                         |
| BP and total cholesterol    | 5,601                              | 14.0 (13.6–14.5) | 163                                | 5.6 (4.7–6.5)    | 0.37 (0.30–0.45)                         |
| All controlled              | 6,961                              | 17.4 (16.7–18.1) | 547                                | 18.8 (17.2–20.3) | 1.08 (0.97;1.21)                         |

95%CI: 95% Confidence interval; HbA1c: Glycated haemoglobin; BP: Blood pressure; IRSAD: Index of Relative Socio-economic Advantage and Disadvantage; CVD: Cardiovascular diseases, including heart failure, ischemic heart disease, and stroke; CKD: Chronic kidney disease.

<sup>†</sup> Past recorded diabetes was used as the reference category. Past recorded diabetes was used as the reference category. Results adjusted for differences between these two groups in terms of practice characteristics (remoteness, IRSAD quintiles), patient sociodemographics (gender, age), and CVD risk factors (smoking status, history of hypertension or CVD, CKD, dyslipidaemia, liver disease, and depressive symptoms using multinomial logistic regression models.

## DISCUSSION

### General findings

Based on a large retrospective cohort study of the national general practice database, this paper highlighted three main findings. Less than half of patients with diabetes had their HbA1c levels assessed over 12 months, and the monitoring of HbA1c or other clinical parameters was less

1  
2  
3 313 frequent among patients with newly than past recorded diabetes. Although patients with newly  
4  
5 314 recorded diabetes were less likely to be monitored, 8 out of 10 of these patients achieved  
6  
7 315 HbA1c control. In general, less than 20% of patients with diabetes who were monitored in 2018  
8  
9 316 had their HbA1c, BP and total cholesterol within targeted levels considered well-controlled.

## 317 **Comparison with literature**

318 Current Australian guidelines recommend annual monitoring of clinical parameters for all  
319 patients with diabetes.[7] Nonetheless, we found that only 45.2% of those with past diabetes  
320 and 39.4% of those with newly recorded diabetes had their HbA1c levels monitored in 2018.  
321 Our results are consistent with the ‘Rule of Halves’ discussed in an Australian review, showing  
322 that half of patients with diabetes receive appropriate diabetes care/monitoring.[13] On the  
323 other hand, another recent Australian retrospective study not included in that review and using  
324 EHRs from patients attending 50 practices in the inner eastern region of Melbourne (MAGNET  
325 database, period 2009-2014) found a higher proportion of monitoring. Findings showed that  
326 66.5% of patients aged 65+years with T2D had their HbA1c checked within the last two  
327 years.[33] However, it is important to note that the population in that study was older, probably  
328 triggering a more frequent monitoring.

329 Among other clinical parameters, BP was the most frequently monitored regardless of having  
330 past (84.3%) or newly recorded diabetes (81.4%). In fact, having a newly recorded diagnosis  
331 of diabetes does not seem to affect BP monitoring in comparison with the general population,  
332 as a population-based study in South Australia found that 81.8% of individuals without diabetes,  
333 hypertension, or CVD had their BP measured by a GP in the last 12 months.[34]

334 People with past recorded diabetes had a slightly higher proportion of kidney function  
335 monitoring than newly recorded diabetes. However, it is concerning that only 1 in 4 patients  
336 had these results reported in the last 12 months, even among those with past diabetes,



1  
2  
3 337 considering that diabetes is one of the most important causes of CKD and annual kidney health  
4  
5 338 checks (eGFR and urine ACR) are strongly recommended for patients living with diabetes.[35]  
6  
7

8 339 It is also concerning that a history of smoking or CVD did not affect the monitoring of the three  
9  
10 340 main parameters (HbA1c, BP and total cholesterol) in any of the groups (past or newly recorded  
11  
12 341 diabetes). These health conditions contribute to absolute CVD risk, diabetes-related  
13  
14 342 comorbidities and, consequently, mortality.[3] However, it is plausible that healthcare  
15  
16 343 professionals have monitored these patients in other settings, such as smoking cessation  
17  
18 344 programs or CVD secondary prevention[7, 36] that would not be captured by our study.  
19  
20  
21

22 345 Although patients with newly recorded diabetes were less likely to have their HbA1c monitored,  
23  
24 346 8 out of 10 of those monitored achieved HbA1c control. Patients with newly recorded diabetes  
25  
26 347 were, on average, eight years younger than those with past diabetes, which suggests their  
27  
28 348 condition was at an earlier stage when complications are less frequent and diabetes control is  
29  
30 349 more likely to be achieved with first-line medications.[2, 3] Additionally, medication  
31  
32 350 adherence among patients with newly diagnosed diabetes can be as high as 65% then reduce  
33  
34 351 over time, which, in turn, has been found to impact diabetes control.[37] A previous study  
35  
36 352 using the MedicineInsight database showed that greater regularity and continuity of care was  
37  
38 353 associated with an increased likelihood of HbA1c monitoring, but it did not influence HbA1c  
39  
40 354 control among patients with diabetes.[38] Our results differ substantially from the findings of  
41  
42 355 a longitudinal study carried out with newly diagnosed patients (within 6 months before  
43  
44 356 screening) from 81 hospitals in China.[39] The investigation found only 36.8% of HbA1c  
45  
46 357 control (< 7.0%),[39] but it is important to consider the different settings and patients  
47  
48 358 characteristics in each study, as patients in hospital or specialised centres tend to need extra  
49  
50 359 care or have a deteriorated health condition. Nonetheless, the possibility of information bias  
51  
52 360 introduced by the less frequent HbA1c monitoring among those with newly recorded diabetes  
53  
54 361 in our study cannot be discounted as an alternative explanation.  
55  
56  
57  
58  
59  
60

1  
2  
3 362 Despite the known effect of behavioural aspects[40] such as denial or anxiety in the patient's  
4  
5 363 ability to monitor and manage their HbA1c when diabetes is diagnosed, according to our results,  
6  
7 364 the management tend to weaken years after the diagnosis. The literature indicates that it  
8  
9 365 happens due to the distress of living with diabetes and the high level of self-care needed to  
10  
11 366 manage blood glucose, but also the lack of appropriate support or patient willpower over  
12  
13  
14 367 time.[1, 40-43] In our study, 54.4% of patients with past recorded diabetes achieved HbA1c  
15  
16 368 control, very similar to results from the AHS (2011-2012), which reported 54.7% of control  
17  
18 369 (HbA1c  $\leq$ 7.0%) among adults with known diabetes.[14] Results from the MAGNET database,  
19  
20  
21 370 2009 to 2014, found that among patients monitored for HbA1c, 42.4% achieved control (i.e.,  
22  
23 371 levels  $\leq$ 7.0% in the most recent laboratory result).[33]

24  
25 372 On the other hand, control of other clinical parameters in our study was better among patients  
26  
27 373 with past than those with newly recorded diabetes. This could be related to the fact that patients  
28  
29 374 with past diabetes were older (almost 60% were 65+ years compared to 41% among newly  
30  
31 375 recorded diabetes), and older patients were at least twice more likely to achieve diabetes control  
32  
33 376 than younger patients (table S4). Results from the AHS (2011-2012)[14] also found that the  
34  
35 377 proportion of patients with well-controlled diabetes increased with age. The reason might be  
36  
37 378 that older patients visit their GP more frequently, allowing more opportunities to have disease  
38  
39 379 management monitored.

40  
41  
42 380 Our findings showed that among patients who had the three key parameters monitored (HbA1c,  
43  
44 381 BP and total cholesterol or LDL-C), only 1 in 5 achieved targeted goals for the three parameters.  
45  
46 382 A British EHR-based study indicated that despite optimal control of different CVD risk factors  
47  
48 383 (HbA1c, systolic-BP, total cholesterol, triglycerides, smoking), patients with diabetes still had  
49  
50 384 a 21% higher CVD risk than those without diabetes, reinforcing the need to monitor and control  
51  
52 385 these parameters.[44] Patients with a history of CVD were more likely to achieve well-  
53  
54 386 controlled parameters, especially when they had newly recorded diabetes diagnosis. This  
55  
56 387 finding might be related to the co-administration of antihypertensive and lipid-lowering therapy

1  
2  
3 388 among patients with a history of CVD to reduce the risk of new CVD events.[45] And the fear  
4  
5 389 of own mortality increases the chances of compliance to medication in the short-term. Besides,  
6  
7 390 this may be because patients with history of CVD were given more intensive treatments or  
8  
9 391 combined use of antidiabetic medications.[46] Discrepancies between patients with past or  
10  
11 392 newly recorded diabetes diagnosis could result from prevalence-incidence bias, and  
12  
13  
14 393 prospective studies would be necessary to elucidate these findings.  
15  
16

## 17 394 **Strengths and limitations**

18  
19  
20 395 The study has significant strengths, such as the use of a large sample of patients attending  
21  
22 396 primary healthcare services across all Australian states and territories. Furthermore, we  
23  
24 397 explored sociodemographic and clinical variables related to diabetes monitoring and control  
25  
26 398 that were not included in the most recent Australian studies on the same topic. Nonetheless,  
27  
28 399 some other relevant covariates (e.g., diet and exercise) were not explored, as they are not  
29  
30 400 consistently recorded in EHRs, or are recorded in the progress notes which cannot be extracted  
31  
32 401 because of confidentiality issues. This is a common limitation of EHR-based studies, as data  
33  
34 402 from progress notes may affect completeness of information used for analysis. Additionally,  
35  
36 403 patients may have had their diabetes parameters monitored somewhere else (e.g., different  
37  
38 404 practices or specialists). To minimise the effect of this, we used different fields to identify  
39  
40 405 laboratory results that were not requested and automatically reported to the practice by the  
41  
42 406 laboratories. Despite using widely accepted target levels for the clinical parameters  
43  
44 407 investigated, they may be adjusted and tailored to individual characteristics, which may not be  
45  
46 408 feasible to differentiate in large epidemiological studies. Finally, prevalence-incidence bias  
47  
48 409 may have affected some of the investigated associations (e.g., history of CVD and  
49  
50 410 hypertension) among patients with past or newly recorded diabetes.  
51  
52  
53  
54  
55  
56  
57  
58  
59  
60

## 411 **CONCLUSION**

412 In Australia, monitoring and achieving clinical targets for diabetes management appears to be  
413 suboptimal. Consistent with previous research, we found half of the patients with diabetes had  
414 a record of their glycaemic levels being checked over 12 months. However, 80% of all those  
415 monitored did not achieve all targets of HbA1c, BP, and total cholesterol recommended by the  
416 RACGP guidelines, regardless of the time of diabetes diagnosis. Multi-component  
417 interventions for early detection and management of risk factors and complications, intensive  
418 glycaemic control and education on self-monitoring of blood glucose in persons with newly  
419 diagnosed diabetes, monitoring diabetes distress as part of routine care since the initial  
420 diagnosis, statin therapy for secondary CVD prevention, and intensive hypertension control  
421 with angiotensin-converting enzyme inhibitors or angiotensin receptor blockers to prevent end-  
422 stage renal disease are some of the cost-effective strategies highlighted in the literature that  
423 could be incorporated and emphasized in standard diabetes care programs.[40, 42, 43, 47, 48]  
424 Further studies are necessary to examine whether systematic implementation of these strategies  
425 in Australian primary healthcare settings, in addition to the continuous promotion of behaviour  
426 changes through clear and engaged communication within health professionals and patients,  
427 can optimise diabetes management in line with guidelines.

### 428 **Acknowledgements**

429 We are grateful to the general practices that participate in MedicineInsight, and the patients  
430 who allow the use of their de-identified information. We also thank all colleagues at the  
431 Discipline of General Practice, especially Dr Jessica Edwards and Dr Mumtaz Begum.

### 432 **Data Availability Statement**

433 Data used in this study was obtained from a third party (MedicineInsight) for this specific  
434 project and cannot be released. Information about MedicineInsight data and how they can be

1  
2  
3 435 accessed is available on the website (<https://www.nps.org.au/medicine-insight>). The data  
4  
5 436 extraction algorithms used in this study are available from the corresponding author upon  
6  
7 437 request.  
8  
9

#### 10 438 **Contributors**

11  
12  
13 439 MZ and DGC contributed to the conception and design of the study. MZ performed the  
14  
15 440 statistical analysis and prepared the manuscript. CB and DGC assisted with data extraction,  
16  
17 441 analysis, and manuscript writing. NS and PH contributed to the design and structure of the  
18  
19 442 manuscript. All authors critically revised the manuscript and provided intellectual support to  
20  
21 443 enhance the manuscript. All authors approved the final version for publication.  
22  
23  
24

25 444 MZ – Mingyue Zheng

26  
27  
28 445 CB – Carla De Oliveira Bernardo

29  
30  
31 446 NS – Nigel Stocks

32  
33  
34 447 PH – Peng Hu

35  
36  
37 448 DGC – David Gonzalez-Chica

#### 38 39 40 449 **Competing Interests**

41  
42  
43 450 The authors declare no conflict of interest.  
44  
45

#### 46 451 **Funding Resources**

47  
48 452 MZ received a PhD Scholarship from the University of Adelaide for this study. Research did  
49  
50 453 not receive any specific grant from funding agencies in the public, commercial, or not-for-  
51  
52 454 profit sectors.  
53  
54  
55

#### 56 455 **Ethics Approval Statement**

1  
2  
3 456 The independent MedicineInsight Data Governance Committee approved the study (protocol  
4  
5 457 2016-007). The Human Research Ethics Committee of the University of Adelaide exempted  
6  
7 458 the study from an ethical review as it used de-identified data.  
8  
9

## 10 459 **References**

- 11 460 1. Lambrinou E, Hansen TB, Beulens JW: Lifestyle factors, self-management and patient  
12 461 empowerment in diabetes care. *Eur J Prev Cardiol* 2019, 26:55-63.
- 13 462 2. Holman RR, Paul SK, Bethel MA, Matthews DR, Neil HAW: 10-year follow-up of  
14 463 intensive glucose control in type 2 diabetes. *New Engl J Med* 2008, 359(15):1577-1589.
- 15 464 3. Aschner P: New IDF clinical practice recommendations for managing type 2 diabetes  
16 465 in primary care. *Diabetes Res Clin Pract* 2017, 132:169-170.
- 17 466 4. Li MZ, Ji LN, Meng ZL, Guo XH, Yang JK, Lu JM, Lu XF, Hong X: Management  
18 467 status of type 2 diabetes mellitus in tertiary hospitals in Beijing: gap between guideline  
19 468 and reality. *Chin Med J (Engl)* 2012, 125(23):4185-4189.
- 20 469 5. Nazarzadeh M, Bidel Z, Canoy D, Copland E, Wamil M, Majert J, Byrne KS,  
21 470 Sundstrom J, Teo K, Davis BR *et al*: Blood pressure lowering and risk of new-onset  
22 471 type 2 diabetes: an individual participant data meta-analysis. *Lancet* 2021,  
23 472 398(10313):1803-1810.
- 24 473 6. Lin X, Xu Y, Pan X, Xu J, Ding Y, Sun X, Song X, Ren Y, Shan PF: Global, regional,  
25 474 and national burden and trend of diabetes in 195 countries and territories: an analysis  
26 475 from 1990 to 2025. *Sci Rep* 2020, 10(1):14790.
- 27 476 7. RACGP: The Royal Australian College of General Practitioners. General practice  
28 477 management of type 2 diabetes: 2016–18. In. East Melbourne, Vic; 2016.
- 29 478 8. Kramer HU, Raum E, Ruter G, Schottker B, Rothenbacher D, Rosemann T, Szecsenyi  
30 479 J, Brenner H: Gender disparities in diabetes and coronary heart disease medication  
31 480 among patients with type 2 diabetes: results from the DIANA study. *Cardiovasc*  
32 481 *Diabetol* 2012, 11.
- 33 482 9. Bertoluci MC, Rocha VZ: Cardiovascular risk assessment in patients with diabetes.  
34 483 *Diabetol Metab Syndr* 2017, 9:25.
- 35 484 10. American Diabetes Association Professional Practice Committee, Draznin B, Aroda  
36 485 VR, Bakris G, Benson G, Brown FM, Freeman R, Green J, Huang E, Isaacs D *et al*: 9.  
37 486 Pharmacologic Approaches to Glycemic Treatment: Standards of Medical Care in  
38 487 Diabetes-2022. *Diabetes Care* 2022, 45(Suppl 1):S125-S143.
- 39 488 11. Mehta S, MocarSKI M, Wisniewski T, Gillespie K, Narayan K MV, Lang K: Primary  
40 489 care physicians' utilization of type 2 diabetes screening guidelines and referrals to  
41 490 behavioral interventions: a survey-linked retrospective study. *BMJ Open Diabetes Res*  
42 491 *Care* 2017, 5(1):e000406.
- 43 492 12. Guthrie B, Emslie-Smith A, Morris AD: Which people with Type 2 diabetes achieve  
44 493 good control of intermediate outcomes? Population database study in a U.K. region.  
45 494 *Diabetic Med* 2009, 26(12):1269-1276.
- 46 495 13. Sainsbury E, Shi YM, Flack J, Colagiuri S: The diagnosis and management of diabetes  
47 496 in Australia: Does the "Rule of Halves" apply? *Diabetes Res Clin Pr* 2020, 170.
- 48 497 14. Australian Health Survey: Biomedical Results for Chronic Diseases
- 49 498 15. Henderson J, Barnett S, Ghosh A, Pollack AJ, Hodgkins A, Win KT, Miller GC,  
50 499 Bonney A: Validation of electronic medical data: Identifying diabetes prevalence in  
51 500 general practice. *Health Inf Manag J* 2019, 48(1):3-11.
- 52 501 16. Havard A, Manski-Nankervis JA, Thistlethwaite J, Daniels B, Myton R, Tu K,  
53 502 Chidwick K: Validity of algorithms for identifying five chronic conditions in

- 1  
2  
3 503 MedicineInsight, an Australian national general practice database. *Bmc Health Serv Res*  
4 504 2021, 21(1).
- 5 505 17. Zheng M, Bernardo CDO, Stocks N, Gonzalez-Chica D: Diabetes Mellitus Diagnosis  
6 506 and Screening in Australian General Practice: A National Study. *Journal of Diabetes*  
7 507 *Research* 2022, 2022.
- 8 508 18. Varroud-Vial M: Improving diabetes management with electronic medical records.  
9 509 *Diabetes Metab* 2011, 37:S48-S52.
- 10 510 19. Marson A, Raffoul N, Osman R, Deed G: Management of patients with type 2 diabetes  
11 511 and cardiovascular disease in primary care. *Aust J Gen Pract* 2021, 50(4):238-245.
- 12 512 20. Benchimol EI, Smeeth L, Guttman A, Harron K, Moher D, Petersen I, Sorensen HT,  
13 513 von Elm E, Langan SM, Comm RW: The REporting of studies Conducted using  
14 514 Observational Routinely-collected health Data (RECORD) Statement. *Plos Med* 2015,  
15 515 12(10).
- 16 516 21. Pulleyblank R, Mellace G, Olsen KR: Evaluation of an Electronic Health Record  
17 517 System With a Disease Management Program and Health Care Treatment Costs for  
18 518 Danish Patients With Type 2 Diabetes. *JAMA Netw Open* 2020, 3(5):e206603.
- 19 519 22. Shah S, Yehekel A, Hossain A, Kerr J, Young K, Shakik S, Nichols J, Yu Cz: The  
20 520 Impact of Guideline Integration into Electronic Medical Records on Outcomes for  
21 521 Patients with Diabetes: A Systematic Review. *Am J Med* 2021, 134(8):952-+.
- 22 522 23. Busingye D, Gianacas C, Pollack A, Chidwick K, Merrifield A, Norman S, Mullin B,  
23 523 Hayhurst R, Blogg S, Havard A *et al*: Data Resource Profile: MedicineInsight, an  
24 524 Australian national primary health care database. *Int J Epidemiol* 2019, 48(6):1741-  
25 525 1741h.
- 26 526 24. Anderson AE, Kerr WT, Thames A, Li T, Xiao JY, Cohen MS: Electronic health record  
27 527 phenotyping improves detection and screening of type 2 diabetes in the general United  
28 528 States population: A cross-sectional, unselected, retrospective study. *J Biomed Inform*  
29 529 2016, 60:162-168.
- 30 530 25. Flory JH, Roy J, Gagne JJ, Haynes K, Herrinton L, Lu C, Paterno E, Shoaibi A, Raebel  
31 531 MA: Missing laboratory results data in electronic health databases: implications for  
32 532 monitoring diabetes risk. *J Comp Effect Res* 2017, 6(1):25-32.
- 33 533 26. Nishioka Y, Takeshita S, Kubo S, Myojin T, Noda T, Okada S, Ishii H, Imamura T,  
34 534 Takahashi Y: Appropriate definition of diabetes using an administrative database: A  
35 535 cross-sectional cohort validation study. *J Diabetes Invest* 2022, 13(2):249-255.
- 36 536 27. Drugs used in diabetes
- 37 537 28. Stram M, Gigliotti T, Hartman D, Pitkus A, Huff SM, Riben M, Henricks WH, Farahani  
38 538 N, Pantanowitz L: Logical Observation Identifiers Names and Codes for Laboratorians  
39 539 Potential Solutions and Challenges for Interoperability. *Arch Pathol Lab Med* 2020,  
40 540 144(2):229-239.
- 41 541 29. Sharma A, Mittal S, Aggarwal R, Chauhan MK: Diabetes and cardiovascular disease:  
42 542 inter-relation of risk factors and treatment. *Futur J Pharm Sci* 2020, 6(1).
- 43 543 30. Census of Population and Housing: Socio-Economic Indexes for Areas (SEIFA),  
44 544 Australia, 2016
- 45 545 31. Roseleur J, Gonzalez-Chica DA, Bernardo CO, Geisler BP, Karnon J, Stocks NP: Blood  
46 546 pressure control in Australian general practice: analysis using general practice records  
47 547 of 1.2 million patients from the MedicineInsight database. *J Hypertens* 2021,  
48 548 39(6):1134-1142.
- 49 549 32. Wasserstein RL, Lazar NA: The ASA's Statement on p-Values: Context, Process, and  
50 550 Purpose. *Am Stat* 2016, 70(2):129-131.
- 51 551 33. Xia T, Turner L, Enticott J, Mazza D, Schattner P: Glycaemic control of Type 2 diabetes  
52 552 in older patients visiting general practitioners: An examination of electronic medical

1  
2  
3  
4  
5  
6  
7  
8  
9  
10  
11  
12  
13  
14  
15  
16  
17  
18  
19  
20  
21  
22  
23  
24  
25  
26  
27  
28  
29  
30  
31  
32  
33  
34  
35  
36  
37  
38  
39  
40  
41  
42  
43  
44  
45  
46  
47  
48  
49  
50  
51  
52  
53  
54  
55  
56  
57  
58  
59  
60

- 553 records to identify risk factors for poor control. *Diabetes Res Clin Pr* 2019, 153:125-  
554 132.
- 555 34. Gonzalez-Chica DA, Bowden J, Miller C, Longo M, Nelson M, Reid C, Stocks N:  
556 Patient-reported GP health assessments rather than individual cardiovascular risk  
557 burden are associated with the engagement in lifestyle changes: population-based  
558 survey in South Australia. *Bmc Fam Pract* 2019, 20(1).
- 559 35. Kidney Health Australia: Chronic Kidney Disease (CKD) Management in Primary  
560 Care. In., 4th edn. [https://kidney.org.au/uploads/resources/CKD-Management-in-  
561 Primary-Care\\_handbook\\_2020.1.pdf](https://kidney.org.au/uploads/resources/CKD-Management-in-Primary-Care_handbook_2020.1.pdf); 2020.
- 562 36. Grundy SM, Stone NJ, Bailey AL, Beam C, Birtcher KK, Blumenthal RS, Braun LT,  
563 de Ferranti S, Faiella-Tommasino J, Forman DE *et al*: 2018  
564 AHA/ACC/AACVPR/AAPA/ABC/ACPM/ADA/AGS/APhA/ASPC/NLA/PCNA  
565 Guideline on the Management of Blood Cholesterol: A Report of the American College  
566 of Cardiology/American Heart Association Task Force on Clinical Practice Guidelines.  
567 *Circulation* 2019, 139(25):e1082-e1143.
- 568 37. Lin LK, Sun Y, Heng BH, Chew DEK, Chong PN: Medication adherence and glycemic  
569 control among newly diagnosed diabetes patients. *Bmj Open Diab Res Ca* 2017, 5(1).
- 570 38. Youens D, Robinson S, Doust J, Harris MN, Moorin R: Associations between regular  
571 G.P. contact, diabetes monitoring and glucose control: an observational study using  
572 general practice data. *Bmj Open* 2021, 11(11).
- 573 39. Lv F, Cai X, Hu D, Pan C, Zhang D, Xu J, Ji L: Characteristics of Newly Diagnosed  
574 Type 2 Diabetes in Chinese Older Adults: A National Prospective Cohort Study.  
575 *Journal of Diabetes Research* 2019, 2019:5631620.
- 576 40. Kalra S, Jena BN, Yeravdekar R: Emotional and Psychological Needs of People with  
577 Diabetes. *Indian J Endocrinol Metab* 2018, 22(5):696-704.
- 578 41. Shrivastava SR, Shrivastava PS, Ramasamy J: Role of self-care in management of  
579 diabetes mellitus. *J Diabetes Metab Disord* 2013, 12(1):14.
- 580 42. Skinner TC, Joensen L, Parkin T: Twenty-five years of diabetes distress research.  
581 *Diabet Med* 2020, 37(3):393-400.
- 582 43. Czupryniak L, Barkai L, Bolgarska S, Bronisz A, Broz J, Cypriak K, Honka M, Janez  
583 A, Krnic M, Lalic N *et al*: Self-monitoring of blood glucose in diabetes: from evidence  
584 to clinical reality in Central and Eastern Europe--recommendations from the  
585 international Central-Eastern European expert group. *Diabetes Technol Ther* 2014,  
586 16(7):460-475.
- 587 44. Wright AK, Suarez-Ortegon MF, Read SH, Kontopantelis E, Buchan I, Emsley R,  
588 Sattar N, Ashcroft DM, Wild SH, Rutter MK: Risk Factor Control and Cardiovascular  
589 Event Risk in People With Type 2 Diabetes in Primary and Secondary Prevention  
590 Settings. *Circulation* 2020, 142(20):1925-1936.
- 591 45. Baker Heart and Diabetes Institute.: National Evidence-Based Guideline on Secondary  
592 Prevention of Cardiovascular Disease in Type 2 Diabetes (Part of the Guidelines on  
593 Management of Type 2 Diabetes). Melbourne Australia; 2015.
- 594 46. Bashier A, Bin Hussain A, Abdelgadir E, Alawadi F, Sabbour H, Chilton R: Consensus  
595 recommendations for management of patients with type 2 diabetes mellitus and  
596 cardiovascular diseases. *Diabetol Metab Syndr* 2019, 11:80.
- 597 47. Li R, Zhang P, Barker LE, Chowdhury FM, Zhang XP: Cost-Effectiveness of  
598 Interventions to Prevent and Control Diabetes Mellitus: A Systematic Review. *Diabetes  
599 Care* 2010, 33(8):1872-1894.
- 600 48. Siegel KR, Ali MK, Zhou XL, Ng BP, Jawanda S, Proia K, Zhang XP, Gregg EW,  
601 Albright AL, Zhang P: Cost-effectiveness of Interventions to Manage Diabetes: Has  
602 the Evidence Changed Since 2008? *Diabetes Care* 2020, 43(7):1557-1592.



1  
2  
3 **603 Supplemental material**

4 **604** Table S1. Proportion<sup>†</sup> of patients with different blood glucose parameters monitored in 2018  
5  
6  
7 **605** among those with past (2015–2016) or newly recorded diabetes (2017)

8  
9  
10 **606** Table S2. Adjusted odds ratio<sup>†</sup> of patients who had all three parameters (HbA1c, blood  
11  
12 **607** pressure, and total cholesterol) monitored, among those with past (2015–2016) or newly  
13  
14 **608** recorded diabetes (2017), according to sociodemographic and clinical characteristics

15  
16  
17 **609** Table S3. Adjusted proportion<sup>†</sup> of the combination of clinical parameters controlled in 2018  
18  
19 **610** among patients with past (2015-2016) or newly recorded diabetes (2017) and available results  
20  
21 **611** for all three parameters (HbA1c, blood pressure, and LDL-C)

22  
23  
24 **612** Table S4. Adjusted odds ratio<sup>†</sup> of distribution of patients with all three clinical parameters  
25  
26 **613** controlled (HbA1c, blood pressure, and total cholesterol) according to sociodemographic and  
27  
28 **614** clinical characteristics among those with past (2015-2016) or newly recorded diabetes (2017)

29  
30  
31  
32 **615** Table S4. Adjusted odds ratio<sup>†</sup> of distribution of patients with all three clinical parameters  
33  
34 **616** controlled (HbA1c, blood pressure, and total cholesterol) according to sociodemographic and  
35  
36 **617** clinical characteristics among those with past (2015-2016) or newly recorded diabetes (2017)

37  
38  
39  
40 **618** Table S5. Adjusted odds ratio<sup>†</sup> of distribution of patients with all three clinical parameters  
41  
42 **619** controlled (HbA1c, blood pressure, and LDL-C) according to sociodemographic and clinical  
43  
44 **620** characteristics among those with past (2015-2016) or newly recorded diabetes (2017)

45  
46  
47 **621 Figure Legend/Caption**

48  
49  
50 **622** Figure 1. Flowchart of the identification of ‘regular’ adult patients with recorded diabetes and  
51  
52 **623** HbA1c control<sup>†</sup>

53  
54  
55 **624** <sup>†</sup> Results are shown as absolute numbers from the dataset without adjusting or weighting. <sup>‡</sup> At  
56  
57 **625** least one consultation per year between 2015 and 2018. <sup>§</sup> Patients were classified as recorded

1  
2  
3 626 diabetes when (1) 'diabetes' was recorded on two different occasions (as a 'diagnosis', 'reason  
4  
5 627 for encounter', or 'reason for prescription', or (2) antidiabetic medications were prescribed  
6  
7 628 (Anatomical Therapeutic Chemical A10A or A10B; metformin was considered only in the  
8  
9 629 absence of polycystic ovary syndrome diagnosis), or (3) diabetes diagnosis was recorded only  
10  
11 630 once, but there was at least one laboratory result (fasting blood glucose, HbA1c or 2-hour oral  
12  
13  
14 631 glucose tolerance test) above the diabetes threshold.  
15  
16  
17  
18  
19  
20  
21  
22  
23  
24  
25  
26  
27  
28  
29  
30  
31  
32  
33  
34  
35  
36  
37  
38  
39  
40  
41  
42  
43  
44  
45  
46  
47  
48  
49  
50  
51  
52  
53  
54  
55  
56  
57  
58  
59  
60

For peer review only

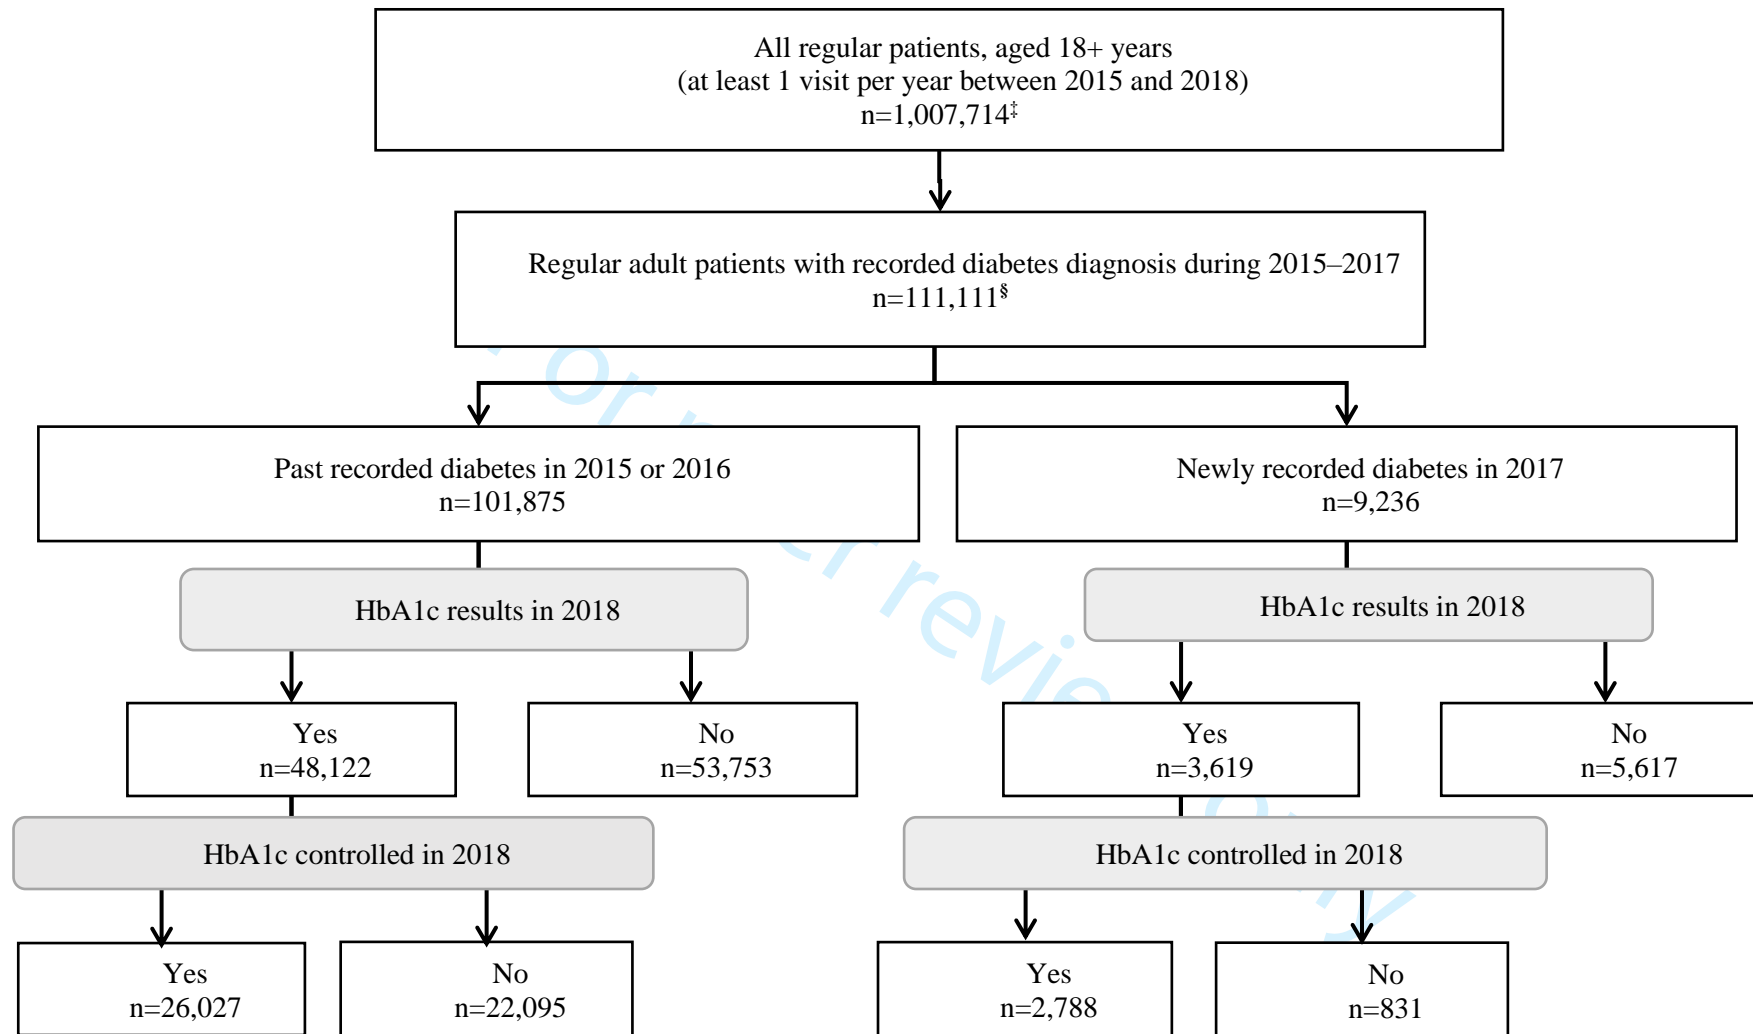

36 † Results are shown as absolute numbers from the dataset without adjusting or weighting. ‡ At least one consultation per year between 2015 and 2018. § Patients were classified  
37 as recorded diabetes when (1) 'diabetes' was recorded on two different occasions (as a 'diagnosis', 'reason for encounter', or 'reason for prescription', or (2) antidiabetic  
38 medications were prescribed (Anatomical Therapeutic Chemical A10A or A10B; metformin was considered only in the absence of polycystic ovary syndrome diagnosis), or (3)  
39 diabetes diagnosis was recorded only once, but there was at least one laboratory result (fasting blood glucose, HbA1c or 2-hour oral glucose tolerance test) above the diabetes  
40 threshold.

41 **Figure 1. Flowchart of the identification of 'regular' adult patients with recorded diabetes and HbA1c control†**

**Table S1. Proportion<sup>†</sup> of patients with different blood glucose parameters monitored in 2018 among those with past (2015–2016) or newly recorded diabetes (2017)**

| Clinical parameters monitored                                        | Patients monitored among those with past recorded diabetes (n=101,875)<br>% (95%CI) | Patients monitored among those with newly recorded diabetes (n=9,236)<br>% (95% CI) |
|----------------------------------------------------------------------|-------------------------------------------------------------------------------------|-------------------------------------------------------------------------------------|
| <b>Number of different blood glucose tests monitored<sup>§</sup></b> |                                                                                     |                                                                                     |
| 0                                                                    | 39.8 (37.5–42.0)                                                                    | 45.5 (43.2–47.9)                                                                    |
| 1                                                                    | 23.8 (22.4–25.2)                                                                    | 21.7 (20.3–23.1)                                                                    |
| 2                                                                    | 27.5 (25.7–29.2)                                                                    | 25.2 (23.5–27.0)                                                                    |
| 3                                                                    | 9.0 (7.9–10.1)                                                                      | 7.5 (6.4–8.6)                                                                       |

95%CI: 95% Confidence interval

<sup>†</sup> Results adjusted for differences between these two groups in terms of practice characteristics (remoteness, IRSAD quintiles), patient sociodemographics (gender, age), and clinical characteristics (smoking status, history of hypertension, CVD, CKD, dyslipidaemia, liver disease, or depressive symptoms using logistic regression models.

<sup>§</sup> Considering either HbA1c, fasting blood glucose and/or random blood glucose.

**Table S2. Adjusted odds ratio† of patients who had all three parameters (HbA1c, blood pressure, and total cholesterol) monitored, among those with past (2015–2016) or newly recorded diabetes (2017), according to sociodemographic and clinical characteristics**

| All three parameters monitored        | Patients monitored among those with past recorded diabetes (n=101,875)<br>Odds ratio (95%CI) | Patients monitored among those with newly recorded diabetes (n=9,236)<br>Odds ratio (95%CI) |
|---------------------------------------|----------------------------------------------------------------------------------------------|---------------------------------------------------------------------------------------------|
| <b>Practice characteristics</b>       |                                                                                              |                                                                                             |
| <b>Geographical area of GP</b>        |                                                                                              |                                                                                             |
| Major cities                          | Ref                                                                                          | Ref                                                                                         |
| Inner regional                        | 1.04 (0.79–1.37)                                                                             | 1.11 (0.86–1.44)                                                                            |
| Outer regional/remote/very remote     | 1.64 (1.22–2.19)                                                                             | 1.64 (1.22–2.20)                                                                            |
| <b>GP IRSAD</b>                       |                                                                                              |                                                                                             |
| More disadvantaged                    | Ref                                                                                          | Ref                                                                                         |
| Middle                                | 0.96 (0.72–1.28)                                                                             | 0.81 (0.62–1.05)                                                                            |
| More advantaged                       | 0.90 (0.70–1.17)                                                                             | 0.95 (0.74–1.22)                                                                            |
| <b>Patient's characteristics</b>      |                                                                                              |                                                                                             |
| <b>Gender</b>                         |                                                                                              |                                                                                             |
| Female                                | Ref                                                                                          | Ref                                                                                         |
| Male                                  | 1.08 (1.04–1.12)                                                                             | 1.26 (1.13–1.40)                                                                            |
| <b>Age group (years)</b>              |                                                                                              |                                                                                             |
| 18–39                                 | Ref                                                                                          | Ref                                                                                         |
| 40–64                                 | 2.72 (2.50–2.97)                                                                             | 3.15 (2.60–3.82)                                                                            |
| 65+                                   | 3.05 (2.76–3.38)                                                                             | 3.87 (3.15–4.76)                                                                            |
| <b>Smoking status</b>                 |                                                                                              |                                                                                             |
| Non-smoker or ex-smoker               | Ref                                                                                          | Ref                                                                                         |
| Smoker                                | 0.91 (0.86–0.96)                                                                             | 0.97 (0.82–1.12)                                                                            |
| <b>History of hypertension</b>        |                                                                                              |                                                                                             |
| No                                    | Ref                                                                                          | Ref                                                                                         |
| Yes                                   | 1.11 (1.04–1.18)                                                                             | 1.17 (1.04–1.30)                                                                            |
| <b>History of CVD</b>                 |                                                                                              |                                                                                             |
| No                                    | Ref                                                                                          | Ref                                                                                         |
| Yes                                   | 0.97 (0.92–1.02)                                                                             | 0.98 (0.84–1.13)                                                                            |
| <b>History of dyslipidaemia</b>       |                                                                                              |                                                                                             |
| No                                    | Ref                                                                                          | Ref                                                                                         |
| Yes                                   | 1.26 (1.18–1.35)                                                                             | 1.23 (1.09–1.39)                                                                            |
| <b>History of CKD</b>                 |                                                                                              |                                                                                             |
| No                                    | Ref                                                                                          | Ref                                                                                         |
| Yes                                   | 0.91 (0.81–1.02)                                                                             | 0.84 (0.62–1.14)                                                                            |
| <b>History of liver disease</b>       |                                                                                              |                                                                                             |
| No                                    | Ref                                                                                          | Ref                                                                                         |
| Yes                                   | 1.02 (0.85–1.22)                                                                             | 0.93 (0.53–1.63)                                                                            |
| <b>History of depressive syndrome</b> |                                                                                              |                                                                                             |
| No                                    | Ref                                                                                          | Ref                                                                                         |
| Yes                                   | 0.89 (0.84–0.94)                                                                             | 0.91 (0.81–1.03)                                                                            |

GP: General practice; Ref: Reference group; 95%CI: 95% Confidence interval; IRSAD: Index of Relative Socio-economic Advantage and Disadvantage; CVD: Cardiovascular disease (including heart failure, ischemic heart disease, and stroke); CKD: Chronic kidney disease.

† Adjusted odds ratio of patients who had all three parameters (HbA1c, blood pressure, and total cholesterol) monitored based on logistic regression models that considered differences among patients with past or newly recorded diabetes adjusted for practice characteristics (remoteness, IRSAD quintiles), patient sociodemographics (gender, age), and clinical characteristics (smoking status, history of hypertension, CVD, CKD, dyslipidaemia, liver disease, or depressive symptoms).

**Table S3. Adjusted proportion<sup>†</sup> of the combination of clinical parameters controlled in 2018 among patients with past (2015-2016) or newly recorded diabetes (2017) and available results for all three parameters (HbA1c, blood pressure, and LDL-C)**

|                            | Past recorded diabetes<br>(n= 34,476) |                  | Newly recorded diabetes<br>(n= 2,521) |                  | Adjusted <sup>†</sup> odds ratio<br>(95%CI) |
|----------------------------|---------------------------------------|------------------|---------------------------------------|------------------|---------------------------------------------|
|                            | n                                     | % (95%CI)        | N                                     | % (95%CI)        |                                             |
| None controlled            | 2,784                                 | 8.1 (7.6–8.6)    | 117                                   | 4.6 (3.8–5.4)    | 0.33 (0.27–0.40)                            |
| Only HbA1c controlled      | 3,223                                 | 9.3 (8.9–9.8)    | 428                                   | 16.9 (15.3–18.6) | 1.05 (0.92–1.20)                            |
| Only BP controlled         | 5,373                                 | 15.6 (15.0–16.2) | 231                                   | 9.2 (8.0–10.3)   | 0.34 (0.29–0.39)                            |
| Only LDL-C controlled      | 2,224                                 | 6.5 (6.1–6.8)    | 50                                    | 2.0 (1.5–2.5)    | 0.18 (0.13–0.23)                            |
| HbA1c and BP controlled    | 6,867                                 | 19.9 (19.2–20.6) | 871                                   | 34.5 (32.5–36.6) | base outcome                                |
| HbA1c and LDL-C controlled | 2,518                                 | 7.3 (6.9–7.7)    | 173                                   | 6.9 (5.7–8.0)    | 0.54 (0.44–0.65)                            |
| BP and LDL-C controlled    | 5,144                                 | 14.9 (14.4–15.4) | 131                                   | 5.2 (4.2–6.2)    | 0.20 (0.16–0.24)                            |
| All controlled             | 6,343                                 | 18.4 (17.7–19.1) | 520                                   | 20.6 (18.9–22.4) | 0.64 (0.56–0.72)                            |

95%CI: 95% Confidence interval; HbA1c: Haemoglobin A1c; BP: Blood pressure; LDL-C: Low-density lipoprotein cholesterol; IRSAD: Index of Relative Socio-economic Advantage and Disadvantage; CVD: Cardiovascular disease (including heart failure, ischemic heart disease, and stroke); CKD: Chronic kidney disease.

<sup>†</sup> Adjusted proportion of the most frequent combination of clinical parameters controlled in 2018 based on multinomial logistic regression models adjusted for practice characteristics (remoteness, IRSAD quintiles), patient sociodemographics (gender, age), and clinical characteristics (smoking status, history of hypertension, CVD, CKD, dyslipidaemia, liver disease, or depressive symptoms).

**Table S4. Adjusted odds ratio† of distribution of patients with all three clinical parameters controlled (HbA1c, blood pressure, and total cholesterol) according to sociodemographic and clinical characteristics among those with past (2015-2016) or newly recorded diabetes (2017)**

| Variables                             | 'All-controlled' among past recorded diabetes (n=40,008)<br>Odds ratio (95%CI) | 'All-controlled' among newly recorded diabetes (n=2,912)<br>Odds ratio (95%CI) |
|---------------------------------------|--------------------------------------------------------------------------------|--------------------------------------------------------------------------------|
| <b>Practice characteristics</b>       |                                                                                |                                                                                |
| <b>Geographical area of GP</b>        |                                                                                |                                                                                |
| Major Cities                          | Ref                                                                            | Ref                                                                            |
| Inner regional                        | 1.05 (0.93–1.20)                                                               | 1.12 (0.86–1.45)                                                               |
| Outer/Remote/Very Remote              | 0.93 (0.80–1.10)                                                               | 0.94 (0.70–1.27)                                                               |
| <b>GP IRSAD</b>                       |                                                                                |                                                                                |
| More disadvantaged                    | Ref                                                                            | Ref                                                                            |
| Middle                                | 1.00 (0.87–1.14)                                                               | 1.08 (0.82–1.41)                                                               |
| More advantaged                       | 0.99 (0.80–1.09)                                                               | 0.81 (0.63–1.06)                                                               |
| <b>Patient's characteristics</b>      |                                                                                |                                                                                |
| <b>Gender</b>                         |                                                                                |                                                                                |
| Female                                | Ref                                                                            | Ref                                                                            |
| Male                                  | 1.50 (1.41–1.58)                                                               | 1.77 (1.44–2.16)                                                               |
| <b>Age group (years)</b>              |                                                                                |                                                                                |
| 18–39                                 | Ref                                                                            | Ref                                                                            |
| 40–64                                 | 1.78 (1.38–2.30)                                                               | 1.25 (0.76–2.05)                                                               |
| 65+                                   | 3.31 (2.58–4.25)                                                               | 2.09 (1.26–3.49)                                                               |
| <b>Smoking status</b>                 |                                                                                |                                                                                |
| Non-smoker or ex-smoker               | Ref                                                                            | Ref                                                                            |
| Smoker                                | 0.91 (0.83–1.00)                                                               | 1.10 (0.83–1.44)                                                               |
| <b>History of hypertension</b>        |                                                                                |                                                                                |
| No                                    | Ref                                                                            | Ref                                                                            |
| Yes                                   | 0.89 (0.84–0.95)                                                               | 0.98 (0.81–1.19)                                                               |
| <b>History of CVD</b>                 |                                                                                |                                                                                |
| No                                    | Ref                                                                            | Ref                                                                            |
| Yes                                   | 1.38 (1.28–1.47)                                                               | 2.42 (1.81–3.22)                                                               |
| <b>History of dyslipidaemia</b>       |                                                                                |                                                                                |
| No                                    | Ref                                                                            | Ref                                                                            |
| Yes                                   | 1.07 (0.99–1.15)                                                               | 1.16 (0.93–1.43)                                                               |
| <b>History of CKD</b>                 |                                                                                |                                                                                |
| No                                    | Ref                                                                            | Ref                                                                            |
| Yes                                   | 0.97 (0.85–1.11)                                                               | 0.86 (0.42–1.77)                                                               |
| <b>History of liver disease</b>       |                                                                                |                                                                                |
| No                                    | Ref                                                                            | Ref                                                                            |
| Yes                                   | 1.29 (0.92–1.80)                                                               | 3.30 (1.33–8.19)                                                               |
| <b>History of depressive syndrome</b> |                                                                                |                                                                                |
| No                                    | Ref                                                                            | Ref                                                                            |
| Yes                                   | 0.91 (0.84–1.00)                                                               | 0.87 (0.67–1.11)                                                               |

GP: General practitioner; Ref: Reference group; 95%CI: 95% Confidence interval; HbA1c: Hemoglobin A1c; IRSAD: Index of Relative Socio-economic Advantage and Disadvantage; CVD: Cardiovascular disease (including heart failure, ischemic heart disease, and stroke); CKD: Chronic kidney disease.

† 'All-controlled' are those patients with HbA1c $\leq$ 7.0%, BP $\leq$ 140/90mmHg, and total cholesterol  $<$ 4.0mmol/L. Adjusted odds ratio of patients who had each clinical parameter controlled based on logistic regression models adjusted for practice characteristics (remoteness, IRSAD quintiles), patient sociodemographics (gender, age), and clinical characteristics (smoking status, history of hypertension, CVD, CKD, dyslipidaemia, liver disease, or depressive symptoms).

**Table S5. Adjusted odds ratio† of distribution of patients with all three clinical parameters controlled (HbA1c, blood pressure, and LDL-C) according to sociodemographic and clinical characteristics among those with past (2015-2016) or newly recorded diabetes (2017)**

| Variables                             | 'All-controlled' among past recorded diabetes (n=34,475)<br>Odds ratio (95%CI) | 'All-controlled' among newly recorded diabetes (n=2,521)<br>Odds ratio (95%CI) |
|---------------------------------------|--------------------------------------------------------------------------------|--------------------------------------------------------------------------------|
| <b>Practice characteristics</b>       |                                                                                |                                                                                |
| <b>Geographical area of GP</b>        |                                                                                |                                                                                |
| Major cities                          | Ref                                                                            | Ref                                                                            |
| Inner regional                        | 1.11 (0.98–1.26)                                                               | 1.14 (0.88–1.50)                                                               |
| Outer/remote/very remote              | 1.05 (0.90–1.21)                                                               | 1.07 (0.77–1.49)                                                               |
| <b>GP IRSAD</b>                       |                                                                                |                                                                                |
| More disadvantaged                    | Ref                                                                            | Ref                                                                            |
| Middle                                | 1.02 (0.89–1.17)                                                               | 0.80 (0.58–1.12)                                                               |
| More advantaged                       | 1.03 (0.92–1.16)                                                               | 0.94 (0.70–1.27)                                                               |
| <b>Patient's characteristics</b>      |                                                                                |                                                                                |
| <b>Gender</b>                         |                                                                                |                                                                                |
| Female                                | Ref                                                                            | Ref                                                                            |
| Male                                  | 1.18 (1.11–1.25)                                                               | 1.23 (1.00–1.51)                                                               |
| <b>Age group (years)</b>              |                                                                                |                                                                                |
| 18-39                                 | Ref                                                                            | Ref                                                                            |
| 40-64                                 | 2.29 (1.67–3.14)                                                               | 2.18 (1.13–4.19)                                                               |
| 65+                                   | 4.38 (3.20–5.98)                                                               | 3.80 (1.97–7.35)                                                               |
| <b>Smoking status</b>                 |                                                                                |                                                                                |
| Non-smoker or ex-smoker               | Ref                                                                            | Ref                                                                            |
| Smoker                                | 0.94 (0.84–1.04)                                                               | 1.15 (0.84–1.56)                                                               |
| <b>History of hypertension</b>        |                                                                                |                                                                                |
| No                                    | Ref                                                                            | Ref                                                                            |
| Yes                                   | 0.89 (0.84–0.95)                                                               | 0.97 (0.80–1.17)                                                               |
| <b>History of CVD</b>                 |                                                                                |                                                                                |
| No                                    | Ref                                                                            | Ref                                                                            |
| Yes                                   | 1.33 (1.22–1.43)                                                               | 2.09 (1.54–2.83)                                                               |
| <b>History of dyslipidaemia</b>       |                                                                                |                                                                                |
| No                                    | Ref                                                                            | Ref                                                                            |
| Yes                                   | 1.10 (1.01–1.19)                                                               | 1.40 (1.11–1.76)                                                               |
| <b>History of CKD</b>                 |                                                                                |                                                                                |
| No                                    | Ref                                                                            | Ref                                                                            |
| Yes                                   | 1.05 (0.91–1.20)                                                               | 1.19 (0.62–2.30)                                                               |
| <b>History of liver disease</b>       |                                                                                |                                                                                |
| No                                    | Ref                                                                            | Ref                                                                            |
| Yes                                   | 1.14 (0.78–1.68)                                                               | 3.37 (1.08–10.57)                                                              |
| <b>History of depressive syndrome</b> |                                                                                |                                                                                |
| No                                    | Ref                                                                            | Ref                                                                            |
| Yes                                   | 0.94 (0.87–1.03)                                                               | 0.87 (0.67–1.13)                                                               |

HbA1c: Haemoglobin A1c; LDL-C: Low-density lipoprotein cholesterol; GP: General practitioner; Ref: Reference group; 95%CI: 95% Confidence interval; IRSAD: Index of Relative Socio-economic Advantage and Disadvantage; CVD: Cardiovascular disease (including heart failure, ischemic heart disease, and stroke); CKD: Chronic kidney disease.

† 'All-controlled' are those patients with HbA1c $\leq$ 7.0%, BP $\leq$ 140/90mmHg, and total cholesterol  $<$ 4.0mmol/L. Adjusted odds ratio of patients who had each clinical parameter controlled based on logistic regression models adjusted for practice characteristics (remoteness, IRSAD quintiles), patient sociodemographics (gender, age), and clinical characteristics (smoking status, history of hypertension, CVD, CKD, dyslipidaemia, liver disease, or depressive symptoms).



**The RECORD statement – checklist of items, extended from the STROBE statement, that should be reported in observational studies using routinely collected health data.**

|                           | Item No. | STROBE items                                                                                                                                                                               | Location in manuscript where items are reported | RECORD items                                                                                                                                                                                                                                                                                                                                                                                                                                | Location in manuscript where items are reported |
|---------------------------|----------|--------------------------------------------------------------------------------------------------------------------------------------------------------------------------------------------|-------------------------------------------------|---------------------------------------------------------------------------------------------------------------------------------------------------------------------------------------------------------------------------------------------------------------------------------------------------------------------------------------------------------------------------------------------------------------------------------------------|-------------------------------------------------|
| <b>Title and abstract</b> |          |                                                                                                                                                                                            |                                                 |                                                                                                                                                                                                                                                                                                                                                                                                                                             |                                                 |
|                           | 1        | (a) Indicate the study's design with a commonly used term in the title or the abstract (b) Provide in the abstract an informative and balanced summary of what was done and what was found |                                                 | RECORD 1.1: The type of data used should be specified in the title or abstract. When possible, the name of the databases used should be included.<br><br>RECORD 1.2: If applicable, the geographic region and timeframe within which the study took place should be reported in the title or abstract.<br><br>RECORD 1.3: If linkage between databases was conducted for the study, this should be clearly stated in the title or abstract. | Lines 15-41                                     |
| <b>Introduction</b>       |          |                                                                                                                                                                                            |                                                 |                                                                                                                                                                                                                                                                                                                                                                                                                                             |                                                 |
| Background rationale      | 2        | Explain the scientific background and rationale for the investigation being reported                                                                                                       |                                                 |                                                                                                                                                                                                                                                                                                                                                                                                                                             | Lines 54-91                                     |
| Objectives                | 3        | State specific objectives, including any prespecified hypotheses                                                                                                                           |                                                 |                                                                                                                                                                                                                                                                                                                                                                                                                                             | Lines 92-99                                     |
| <b>Methods</b>            |          |                                                                                                                                                                                            |                                                 |                                                                                                                                                                                                                                                                                                                                                                                                                                             |                                                 |
| Study Design              | 4        | Present key elements of study design early in the paper                                                                                                                                    |                                                 |                                                                                                                                                                                                                                                                                                                                                                                                                                             | Lines 101-109                                   |
| Setting                   | 5        | Describe the setting, locations, and relevant dates, including periods of recruitment, exposure, follow-up, and data collection                                                            |                                                 |                                                                                                                                                                                                                                                                                                                                                                                                                                             | Lines 110-140                                   |
| Participants              | 6        | (a) <i>Cohort study</i> - Give the                                                                                                                                                         |                                                 | RECORD 6.1: The methods of study                                                                                                                                                                                                                                                                                                                                                                                                            | Lines 122-142                                   |

|                                                                                                                                                 |                              |                                                                                                                                                                                                                                                                                                                                                                                                                                                                                                                                                                                                                                                                                           |                                                                                                                                                                                      |                                                                                                                                                                                                                                                                                                                                                                                                                                                                                                                                                                                                                                                                     |                                 |
|-------------------------------------------------------------------------------------------------------------------------------------------------|------------------------------|-------------------------------------------------------------------------------------------------------------------------------------------------------------------------------------------------------------------------------------------------------------------------------------------------------------------------------------------------------------------------------------------------------------------------------------------------------------------------------------------------------------------------------------------------------------------------------------------------------------------------------------------------------------------------------------------|--------------------------------------------------------------------------------------------------------------------------------------------------------------------------------------|---------------------------------------------------------------------------------------------------------------------------------------------------------------------------------------------------------------------------------------------------------------------------------------------------------------------------------------------------------------------------------------------------------------------------------------------------------------------------------------------------------------------------------------------------------------------------------------------------------------------------------------------------------------------|---------------------------------|
| 1<br>2<br>3<br>4<br>5<br>6<br>7<br>8<br>9<br>10<br>11<br>12<br>13<br>14<br>15<br>16<br>17<br>18<br>19<br>20<br>21<br>22<br>23<br>24<br>25<br>26 |                              | <p>eligibility criteria, and the sources and methods of selection of participants. Describe methods of follow-up</p> <p><i>Case-control study</i> - Give the eligibility criteria, and the sources and methods of case ascertainment and control selection. Give the rationale for the choice of cases and controls</p> <p><i>Cross-sectional study</i> - Give the eligibility criteria, and the sources and methods of selection of participants</p> <p><i>(b) Cohort study</i> - For matched studies, give matching criteria and number of exposed and unexposed</p> <p><i>Case-control study</i> - For matched studies, give matching criteria and the number of controls per case</p> |                                                                                                                                                                                      | <p>population selection (such as codes or algorithms used to identify subjects) should be listed in detail. If this is not possible, an explanation should be provided.</p> <p>RECORD 6.2: Any validation studies of the codes or algorithms used to select the population should be referenced. If validation was conducted for this study and not published elsewhere, detailed methods and results should be provided.</p> <p>RECORD 6.3: If the study involved linkage of databases, consider use of a flow diagram or other graphical display to demonstrate the data linkage process, including the number of individuals with linked data at each stage.</p> | <p>Lines 110-121</p> <p>n/a</p> |
| 27<br>28<br>29<br>30<br>31<br>32<br>33                                                                                                          | Variables                    | 7                                                                                                                                                                                                                                                                                                                                                                                                                                                                                                                                                                                                                                                                                         | Clearly define all outcomes, exposures, predictors, potential confounders, and effect modifiers. Give diagnostic criteria, if applicable.                                            | RECORD 7.1: A complete list of codes and algorithms used to classify exposures, outcomes, confounders, and effect modifiers should be provided. If these cannot be reported, an explanation should be provided.                                                                                                                                                                                                                                                                                                                                                                                                                                                     | Lines 143-184                   |
| 34<br>35<br>36<br>37<br>38<br>39<br>40<br>41                                                                                                    | Data sources/<br>measurement | 8                                                                                                                                                                                                                                                                                                                                                                                                                                                                                                                                                                                                                                                                                         | For each variable of interest, give sources of data and details of methods of assessment (measurement). Describe comparability of assessment methods if there is more than one group |                                                                                                                                                                                                                                                                                                                                                                                                                                                                                                                                                                                                                                                                     | Lines 144-170                   |
| 42<br>43<br>44                                                                                                                                  | Bias                         | 9                                                                                                                                                                                                                                                                                                                                                                                                                                                                                                                                                                                                                                                                                         | Describe any efforts to address potential sources of bias                                                                                                                            |                                                                                                                                                                                                                                                                                                                                                                                                                                                                                                                                                                                                                                                                     | Lines 196-202                   |

|                                                                                                                                                  |                                  |    |                                                                                                                                                                                                                                                                                                                                                                                                                                                                                                                                                                      |                                                                                                                                                                                                                                                              |               |
|--------------------------------------------------------------------------------------------------------------------------------------------------|----------------------------------|----|----------------------------------------------------------------------------------------------------------------------------------------------------------------------------------------------------------------------------------------------------------------------------------------------------------------------------------------------------------------------------------------------------------------------------------------------------------------------------------------------------------------------------------------------------------------------|--------------------------------------------------------------------------------------------------------------------------------------------------------------------------------------------------------------------------------------------------------------|---------------|
| 1<br>2<br>3<br>4<br>5<br>6<br>7                                                                                                                  | Study size                       | 10 | Explain how the study size was arrived at                                                                                                                                                                                                                                                                                                                                                                                                                                                                                                                            |                                                                                                                                                                                                                                                              | n/a           |
| 8<br>9<br>10<br>11<br>12<br>13<br>14<br>15<br>16<br>17<br>18<br>19<br>20<br>21<br>22<br>23<br>24<br>25<br>26<br>27<br>28<br>29<br>30<br>31<br>32 | Quantitative variables           | 11 | Explain how quantitative variables were handled in the analyses. If applicable, describe which groupings were chosen, and why                                                                                                                                                                                                                                                                                                                                                                                                                                        |                                                                                                                                                                                                                                                              | Lines 144-170 |
| 33<br>34<br>35<br>36<br>37<br>38<br>39<br>40<br>41<br>42                                                                                         | Statistical methods              | 12 | (a) Describe all statistical methods, including those used to control for confounding<br>(b) Describe any methods used to examine subgroups and interactions<br>(c) Explain how missing data were addressed<br>(d) <i>Cohort study</i> - If applicable, explain how loss to follow-up was addressed<br><i>Case-control study</i> - If applicable, explain how matching of cases and controls was addressed<br><i>Cross-sectional study</i> - If applicable, describe analytical methods taking account of sampling strategy<br>(e) Describe any sensitivity analyses |                                                                                                                                                                                                                                                              | Lines 185-206 |
| 43<br>44<br>45<br>46<br>47                                                                                                                       | Data access and cleaning methods |    | ..                                                                                                                                                                                                                                                                                                                                                                                                                                                                                                                                                                   | RECORD 12.1: Authors should describe the extent to which the investigators had access to the database population used to create the study population.<br><br>RECORD 12.2: Authors should provide information on the data cleaning methods used in the study. | Lines 104-109 |
|                                                                                                                                                  | Linkage                          |    | ..                                                                                                                                                                                                                                                                                                                                                                                                                                                                                                                                                                   | RECORD 12.3: State whether the                                                                                                                                                                                                                               |               |

|                  |    |                                                                                                                                                                                                                                                                                                                               |  |                                                                                                                                                                                                                                                                                                           |               |
|------------------|----|-------------------------------------------------------------------------------------------------------------------------------------------------------------------------------------------------------------------------------------------------------------------------------------------------------------------------------|--|-----------------------------------------------------------------------------------------------------------------------------------------------------------------------------------------------------------------------------------------------------------------------------------------------------------|---------------|
|                  |    |                                                                                                                                                                                                                                                                                                                               |  | study included person-level, institutional-level, or other data linkage across two or more databases. The methods of linkage and methods of linkage quality evaluation should be provided.                                                                                                                | n/a           |
| <b>Results</b>   |    |                                                                                                                                                                                                                                                                                                                               |  |                                                                                                                                                                                                                                                                                                           |               |
| Participants     | 13 | (a) Report the numbers of individuals at each stage of the study (e.g., numbers potentially eligible, examined for eligibility, confirmed eligible, included in the study, completing follow-up, and analysed)<br>(b) Give reasons for non-participation at each stage.<br>(c) Consider use of a flow diagram                 |  | RECORD 13.1: Describe in detail the selection of the persons included in the study (i.e., study population selection) including filtering based on data quality, data availability and linkage. The selection of included persons can be described in the text and/or by means of the study flow diagram. | Lines 220-220 |
| Descriptive data | 14 | (a) Give characteristics of study participants (e.g., demographic, clinical, social) and information on exposures and potential confounders<br>(b) Indicate the number of participants with missing data for each variable of interest<br>(c) <i>Cohort study</i> - summarise follow-up time (e.g., average and total amount) |  |                                                                                                                                                                                                                                                                                                           | Lines 214-220 |
| Outcome data     | 15 | <i>Cohort study</i> - Report numbers of outcome events or summary measures over time<br><i>Case-control study</i> - Report numbers in each exposure category, or summary measures of exposure<br><i>Cross-sectional study</i> - Report numbers of outcome events or                                                           |  |                                                                                                                                                                                                                                                                                                           | Lines 233-306 |

1  
2  
3  
4  
5  
6  
7  
8  
9  
10  
11  
12  
13  
14  
15  
16  
17  
18  
19  
20  
21  
22  
23  
24  
25  
26  
27  
28  
29  
30  
31  
32  
33  
34  
35  
36  
37  
38  
39  
40  
41  
42  
43  
44  
45  
46  
47

|                                                                                           |                   |                  |                                                                                                                                                                                                                                                                                                                                                                                                                 |                                                                                                                                                                                                                                                                                                          |               |
|-------------------------------------------------------------------------------------------|-------------------|------------------|-----------------------------------------------------------------------------------------------------------------------------------------------------------------------------------------------------------------------------------------------------------------------------------------------------------------------------------------------------------------------------------------------------------------|----------------------------------------------------------------------------------------------------------------------------------------------------------------------------------------------------------------------------------------------------------------------------------------------------------|---------------|
|                                                                                           |                   | summary measures |                                                                                                                                                                                                                                                                                                                                                                                                                 |                                                                                                                                                                                                                                                                                                          |               |
| 1<br>2<br>3<br>4<br>5<br>6<br>7<br>8<br>9<br>10<br>11<br>12<br>13<br>14<br>15<br>16<br>17 | Main results      | 16               | (a) Give unadjusted estimates and, if applicable, confounder-adjusted estimates and their precision (e.g., 95% confidence interval). Make clear which confounders were adjusted for and why they were included<br>(b) Report category boundaries when continuous variables were categorized<br>(c) If relevant, consider translating estimates of relative risk into absolute risk for a meaningful time period |                                                                                                                                                                                                                                                                                                          | Lines 233-306 |
| 18<br>19<br>20<br>21                                                                      | Other analyses    | 17               | Report other analyses done—e.g., analyses of subgroups and interactions, and sensitivity analyses                                                                                                                                                                                                                                                                                                               |                                                                                                                                                                                                                                                                                                          | Lines 290-294 |
| 22                                                                                        | <b>Discussion</b> |                  |                                                                                                                                                                                                                                                                                                                                                                                                                 |                                                                                                                                                                                                                                                                                                          |               |
| 23<br>24<br>25                                                                            | Key results       | 18               | Summarise key results with reference to study objectives                                                                                                                                                                                                                                                                                                                                                        |                                                                                                                                                                                                                                                                                                          | Lines 309-316 |
| 26<br>27<br>28<br>29<br>30<br>31<br>32<br>33<br>34<br>35                                  | Limitations       | 19               | Discuss limitations of the study, taking into account sources of potential bias or imprecision. Discuss both direction and magnitude of any potential bias                                                                                                                                                                                                                                                      | RECORD 19.1: Discuss the implications of using data that were not created or collected to answer the specific research question(s). Include discussion of misclassification bias, unmeasured confounding, missing data, and changing eligibility over time, as they pertain to the study being reported. | Lines 394-410 |
| 36<br>37<br>38<br>39<br>40<br>41<br>42<br>43<br>44                                        | Interpretation    | 20               | Give a cautious overall interpretation of results considering objectives, limitations, multiplicity of analyses, results from similar studies, and other relevant evidence                                                                                                                                                                                                                                      |                                                                                                                                                                                                                                                                                                          | Lines 317-393 |

|                                        |                                                           |    |                                                                                                                                                               |  |                                                                                                                                                          |               |
|----------------------------------------|-----------------------------------------------------------|----|---------------------------------------------------------------------------------------------------------------------------------------------------------------|--|----------------------------------------------------------------------------------------------------------------------------------------------------------|---------------|
| 1<br>2<br>3                            | Generalisability                                          | 21 | Discuss the generalisability (external validity) of the study results                                                                                         |  |                                                                                                                                                          | Lines 393-408 |
| 4                                      | <b>Other Information</b>                                  |    |                                                                                                                                                               |  |                                                                                                                                                          |               |
| 5<br>6<br>7<br>8<br>9                  | Funding                                                   | 22 | Give the source of funding and the role of the funders for the present study and, if applicable, for the original study on which the present article is based |  |                                                                                                                                                          | Lines 449-452 |
| 10<br>11<br>12<br>13<br>14<br>15<br>16 | Accessibility of protocol, raw data, and programming code |    | ..                                                                                                                                                            |  | RECORD 22.1: Authors should provide information on how to access any supplemental information such as the study protocol, raw data, or programming code. | Lines 432-437 |

\*Reference: Benchimol EI, Smeeth L, Guttman A, Harron K, Moher D, Petersen I, Sørensen HT, von Elm E, Langan SM, the RECORD Working Committee. The REporting of studies Conducted using Observational Routinely-collected health Data (RECORD) Statement. *PLoS Medicine* 2015; in press.

\*Checklist is protected under Creative Commons Attribution ([CC BY](https://creativecommons.org/licenses/by/4.0/)) license.
