# Supplementary material for: Diabetes mellitus monitoring and control among adults in Australian general practice: a national retrospective cohort study
Source: PubMed Central journal article supplement — BMJ Open. 2023 Apr 25;13(4):e069875. doi: 10.1136/bmjopen-2022-069875 (PMC10151933; doi:10.1136/bmjopen-2022-069875), 2023-04-25
Supplement: bmjopen-2022-069875supp001.pdf [file bmjopen-2022-069875supp001.pdf]

**Table S1. Proportion<sup>†</sup> of patients with different blood glucose parameters monitored in 2018 among those with past (2015–2016) or newly recorded diabetes (2017)**

| Clinical parameters monitored                                        | Patients monitored among those with past recorded diabetes<br>(n=101,875)<br>% (95% CI) | Patients monitored among those with newly recorded diabetes<br>(n=9,236)<br>% (95% CI) |
|----------------------------------------------------------------------|-----------------------------------------------------------------------------------------|----------------------------------------------------------------------------------------|
| <b>Number of different blood glucose tests monitored<sup>§</sup></b> |                                                                                         |                                                                                        |
| 0                                                                    | 39.8 (37.5–42.0)                                                                        | 45.5 (43.2–47.9)                                                                       |
| 1                                                                    | 23.8 (22.4–25.2)                                                                        | 21.7 (20.3–23.1)                                                                       |
| 2                                                                    | 27.5 (25.7–29.2)                                                                        | 25.2 (23.5–27.0)                                                                       |
| 3                                                                    | 9.0 (7.9–10.1)                                                                          | 7.5 (6.4–8.6)                                                                          |

95%CI: 95% Confidence interval

<sup>†</sup> Results adjusted for differences between these two groups in terms of practice characteristics (remoteness, IRSAD quintiles), patient sociodemographics (gender, age), and clinical characteristics (smoking status, history of hypertension, CVD, CKD, dyslipidaemia, liver disease, or depressive symptoms using logistic regression models.

<sup>§</sup> Considering either HbA1c, fasting blood glucose and/or random blood glucose.

**Table S2. Adjusted odds ratio<sup>†</sup> of patients who had all three parameters (HbA1c, blood pressure, and total cholesterol) monitored, among those with past (2015–2016) or newly recorded diabetes (2017), according to sociodemographic and clinical characteristics**

| All three parameters monitored        | Patients monitored among those with past recorded diabetes (n=101,875)<br>Odds ratio (95% CI) | Patients monitored among those with newly recorded diabetes (n=9,236)<br>Odds ratio (95% CI) |
|---------------------------------------|-----------------------------------------------------------------------------------------------|----------------------------------------------------------------------------------------------|
| <b>Practice characteristics</b>       |                                                                                               |                                                                                              |
| <b>Geographical area of GP</b>        |                                                                                               |                                                                                              |
| Major cities                          | Ref                                                                                           | Ref                                                                                          |
| Inner regional                        | 1.04 (0.79–1.37)                                                                              | 1.11 (0.86–1.44)                                                                             |
| Outer regional/remote/very remote     | 1.64 (1.22–2.19)                                                                              | 1.64 (1.22–2.20)                                                                             |
| <b>GP IRSAD</b>                       |                                                                                               |                                                                                              |
| More disadvantaged                    | Ref                                                                                           | Ref                                                                                          |
| Middle                                | 0.96 (0.72–1.28)                                                                              | 0.81 (0.62–1.05)                                                                             |
| More advantaged                       | 0.90 (0.70–1.17)                                                                              | 0.95 (0.74–1.22)                                                                             |
| <b>Patient's characteristics</b>      |                                                                                               |                                                                                              |
| <b>Gender</b>                         |                                                                                               |                                                                                              |
| Female                                | Ref                                                                                           | Ref                                                                                          |
| Male                                  | 1.08 (1.04–1.12)                                                                              | 1.26 (1.13–1.40)                                                                             |
| <b>Age group (years)</b>              |                                                                                               |                                                                                              |
| 18–39                                 | Ref                                                                                           | Ref                                                                                          |
| 40–64                                 | 2.72 (2.50–2.97)                                                                              | 3.15 (2.60–3.82)                                                                             |
| 65+                                   | 3.05 (2.76–3.38)                                                                              | 3.87 (3.15–4.76)                                                                             |
| <b>Smoking status</b>                 |                                                                                               |                                                                                              |
| Non-smoker or ex-smoker               | Ref                                                                                           | Ref                                                                                          |
| Smoker                                | 0.91 (0.86–0.96)                                                                              | 0.97 (0.82–1.12)                                                                             |
| <b>History of hypertension</b>        |                                                                                               |                                                                                              |
| No                                    | Ref                                                                                           | Ref                                                                                          |
| Yes                                   | 1.11 (1.04–1.18)                                                                              | 1.17 (1.04–1.30)                                                                             |
| <b>History of CVD</b>                 |                                                                                               |                                                                                              |
| No                                    | Ref                                                                                           | Ref                                                                                          |
| Yes                                   | 0.97 (0.92–1.02)                                                                              | 0.98 (0.84–1.13)                                                                             |
| <b>History of dyslipidaemia</b>       |                                                                                               |                                                                                              |
| No                                    | Ref                                                                                           | Ref                                                                                          |
| Yes                                   | 1.26 (1.18–1.35)                                                                              | 1.23 (1.09–1.39)                                                                             |
| <b>History of CKD</b>                 |                                                                                               |                                                                                              |
| No                                    | Ref                                                                                           | Ref                                                                                          |
| Yes                                   | 0.91 (0.81–1.02)                                                                              | 0.84 (0.62–1.14)                                                                             |
| <b>History of liver disease</b>       |                                                                                               |                                                                                              |
| No                                    | Ref                                                                                           | Ref                                                                                          |
| Yes                                   | 1.02 (0.85–1.22)                                                                              | 0.93 (0.53–1.63)                                                                             |
| <b>History of depressive syndrome</b> |                                                                                               |                                                                                              |
| No                                    | Ref                                                                                           | Ref                                                                                          |
| Yes                                   | 0.89 (0.84–0.94)                                                                              | 0.91 (0.81–1.03)                                                                             |

GP: General practice; Ref: Reference group; 95%CI: 95% Confidence interval; IRSAD: Index of Relative Socio-economic Advantage and Disadvantage; CVD: Cardiovascular disease (including heart failure, ischemic heart disease, and stroke); CKD: Chronic kidney disease.

<sup>†</sup> Adjusted odds ratio of patients who had all three parameters (HbA1c, blood pressure, and total cholesterol) monitored based on logistic regression models that considered differences among patients with past or newly recorded diabetes adjusted for practice characteristics (remoteness, IRSAD quintiles), patient sociodemographics (gender, age), and clinical characteristics (smoking status, history of hypertension, CVD, CKD, dyslipidaemia, liver disease, or depressive symptoms).

**Table S3. Adjusted proportion<sup>†</sup> of the combination of clinical parameters controlled in 2018 among patients with past (2015-2016) or newly recorded diabetes (2017) and available results for all three parameters (HbA1c, blood pressure, and LDL-C)**

|                            | Past recorded diabetes<br>(n= 34,476) |                  | Newly recorded diabetes<br>(n= 2,521) |                  | Adjusted <sup>†</sup> odds ratio<br>(95%CI) |
|----------------------------|---------------------------------------|------------------|---------------------------------------|------------------|---------------------------------------------|
|                            | n                                     | % (95% CI)       | N                                     | % (95% CI)       |                                             |
| None controlled            | 2,784                                 | 8.1 (7.6–8.6)    | 117                                   | 4.6 (3.8–5.4)    | 0.33 (0.27–0.40)                            |
| Only HbA1c controlled      | 3,223                                 | 9.3 (8.9–9.8)    | 428                                   | 16.9 (15.3–18.6) | 1.05 (0.92–1.20)                            |
| Only BP controlled         | 5,373                                 | 15.6 (15.0–16.2) | 231                                   | 9.2 (8.0–10.3)   | 0.34 (0.29–0.39)                            |
| Only LDL-C controlled      | 2,224                                 | 6.5 (6.1–6.8)    | 50                                    | 2.0 (1.5–2.5)    | 0.18 (0.13–0.23)                            |
| HbA1c and BP controlled    | 6,867                                 | 19.9 (19.2–20.6) | 871                                   | 34.5 (32.5–36.6) | base outcome                                |
| HbA1c and LDL-C controlled | 2,518                                 | 7.3 (6.9–7.7)    | 173                                   | 6.9 (5.7–8.0)    | 0.54 (0.44–0.65)                            |
| BP and LDL-C controlled    | 5,144                                 | 14.9 (14.4–15.4) | 131                                   | 5.2 (4.2–6.2)    | 0.20 (0.16–0.24)                            |
| All controlled             | 6,343                                 | 18.4 (17.7–19.1) | 520                                   | 20.6 (18.9–22.4) | 0.64 (0.56–0.72)                            |

95%CI: 95% Confidence interval; HbA1c: Haemoglobin A1c; BP: Blood pressure; LDL-C: Low-density lipoprotein cholesterol; IRSAD: Index of Relative Socio-economic Advantage and Disadvantage; CVD: Cardiovascular disease (including heart failure, ischemic heart disease, and stroke); CKD: Chronic kidney disease.

<sup>†</sup> Adjusted proportion of the most frequent combination of clinical parameters controlled in 2018 based on multinomial logistic regression models adjusted for practice characteristics (remoteness, IRSAD quintiles), patient sociodemographics (gender, age), and clinical characteristics (smoking status, history of hypertension, CVD, CKD, dyslipidaemia, liver disease, or depressive symptoms).

**Table S4. Adjusted odds ratio<sup>†</sup> of distribution of patients with all three clinical parameters controlled (HbA1c, blood pressure, and total cholesterol) according to sociodemographic and clinical characteristics among those with past (2015-2016) or newly recorded diabetes (2017)**

| Variables                             | 'All-controlled' among past recorded diabetes (n=40,008)<br>Odds ratio (95% CI) | 'All-controlled' among newly recorded diabetes (n=2,912)<br>Odds ratio (95% CI) |
|---------------------------------------|---------------------------------------------------------------------------------|---------------------------------------------------------------------------------|
| <b>Practice characteristics</b>       |                                                                                 |                                                                                 |
| <b>Geographical area of GP</b>        |                                                                                 |                                                                                 |
| Major Cities                          | Ref                                                                             | Ref                                                                             |
| Inner regional                        | 1.05 (0.93–1.20)                                                                | 1.12 (0.86–1.45)                                                                |
| Outer/Remote/Very Remote              | 0.93 (0.80–1.10)                                                                | 0.94 (0.70–1.27)                                                                |
| <b>GP IRSAD</b>                       |                                                                                 |                                                                                 |
| More disadvantaged                    | Ref                                                                             | Ref                                                                             |
| Middle                                | 1.00 (0.87–1.14)                                                                | 1.08 (0.82–1.41)                                                                |
| More advantaged                       | 0.99 (0.80–1.09)                                                                | 0.81 (0.63–1.06)                                                                |
| <b>Patient's characteristics</b>      |                                                                                 |                                                                                 |
| <b>Gender</b>                         |                                                                                 |                                                                                 |
| Female                                | Ref                                                                             | Ref                                                                             |
| Male                                  | 1.50 (1.41–1.58)                                                                | 1.77 (1.44–2.16)                                                                |
| <b>Age group (years)</b>              |                                                                                 |                                                                                 |
| 18–39                                 | Ref                                                                             | Ref                                                                             |
| 40–64                                 | 1.78 (1.38–2.30)                                                                | 1.25 (0.76–2.05)                                                                |
| 65+                                   | 3.31 (2.58–4.25)                                                                | 2.09 (1.26–3.49)                                                                |
| <b>Smoking status</b>                 |                                                                                 |                                                                                 |
| Non-smoker or ex-smoker               | Ref                                                                             | Ref                                                                             |
| Smoker                                | 0.91 (0.83–1.00)                                                                | 1.10 (0.83–1.44)                                                                |
| <b>History of hypertension</b>        |                                                                                 |                                                                                 |
| No                                    | Ref                                                                             | Ref                                                                             |
| Yes                                   | 0.89 (0.84–0.95)                                                                | 0.98 (0.81–1.19)                                                                |
| <b>History of CVD</b>                 |                                                                                 |                                                                                 |
| No                                    | Ref                                                                             | Ref                                                                             |
| Yes                                   | 1.38 (1.28–1.47)                                                                | 2.42 (1.81–3.22)                                                                |
| <b>History of dyslipidaemia</b>       |                                                                                 |                                                                                 |
| No                                    | Ref                                                                             | Ref                                                                             |
| Yes                                   | 1.07 (0.99–1.15)                                                                | 1.16 (0.93–1.43)                                                                |
| <b>History of CKD</b>                 |                                                                                 |                                                                                 |
| No                                    | Ref                                                                             | Ref                                                                             |
| Yes                                   | 0.97 (0.85–1.11)                                                                | 0.86 (0.42–1.77)                                                                |
| <b>History of liver disease</b>       |                                                                                 |                                                                                 |
| No                                    | Ref                                                                             | Ref                                                                             |
| Yes                                   | 1.29 (0.92–1.80)                                                                | 3.30 (1.33–8.19)                                                                |
| <b>History of depressive syndrome</b> |                                                                                 |                                                                                 |
| No                                    | Ref                                                                             | Ref                                                                             |
| Yes                                   | 0.91 (0.84–1.00)                                                                | 0.87 (0.67–1.11)                                                                |

GP: General practitioner; Ref: Reference group; 95%CI: 95% Confidence interval; HbA1c: Hemoglobin A1c; IRSAD: Index of Relative Socio-economic Advantage and Disadvantage; CVD: Cardiovascular disease (including heart failure, ischemic heart disease, and stroke); CKD: Chronic kidney disease.

<sup>†</sup> 'All-controlled' are those patients with HbA1c $\leq$ 7.0%, BP $\leq$ 140/90mmHg, and total cholesterol  $<$ 4.0mmol/L. Adjusted odds ratio of patients who had each clinical parameter controlled based on logistic regression models adjusted for practice characteristics (remoteness, IRSAD quintiles), patient sociodemographics (gender, age), and clinical characteristics (smoking status, history of hypertension, CVD, CKD, dyslipidaemia, liver disease, or depressive symptoms).

**Table S5. Adjusted odds ratio<sup>†</sup> of distribution of patients with all three clinical parameters controlled (HbA1c, blood pressure, and LDL-C) according to sociodemographic and clinical characteristics among those with past (2015-2016) or newly recorded diabetes (2017)**

| Variables                             | 'All-controlled' among past recorded diabetes (n=34,475)<br>Odds ratio (95% CI) | 'All-controlled' among newly recorded diabetes (n=2,521)<br>Odds ratio (95% CI) |
|---------------------------------------|---------------------------------------------------------------------------------|---------------------------------------------------------------------------------|
| <b>Practice characteristics</b>       |                                                                                 |                                                                                 |
| <b>Geographical area of GP</b>        |                                                                                 |                                                                                 |
| Major cities                          | Ref                                                                             | Ref                                                                             |
| Inner regional                        | 1.11 (0.98–1.26)                                                                | 1.14 (0.88–1.50)                                                                |
| Outer/remote/very remote              | 1.05 (0.90–1.21)                                                                | 1.07 (0.77–1.49)                                                                |
| <b>GP IRSAD</b>                       |                                                                                 |                                                                                 |
| More disadvantaged                    | Ref                                                                             | Ref                                                                             |
| Middle                                | 1.02 (0.89–1.17)                                                                | 0.80 (0.58–1.12)                                                                |
| More advantaged                       | 1.03 (0.92–1.16)                                                                | 0.94 (0.70–1.27)                                                                |
| <b>Patient's characteristics</b>      |                                                                                 |                                                                                 |
| <b>Gender</b>                         |                                                                                 |                                                                                 |
| Female                                | Ref                                                                             | Ref                                                                             |
| Male                                  | 1.18 (1.11–1.25)                                                                | 1.23 (1.00–1.51)                                                                |
| <b>Age group (years)</b>              |                                                                                 |                                                                                 |
| 18-39                                 | Ref                                                                             | Ref                                                                             |
| 40-64                                 | 2.29 (1.67–3.14)                                                                | 2.18 (1.13–4.19)                                                                |
| 65+                                   | 4.38 (3.20–5.98)                                                                | 3.80 (1.97–7.35)                                                                |
| <b>Smoking status</b>                 |                                                                                 |                                                                                 |
| Non-smoker or ex-smoker               | Ref                                                                             | Ref                                                                             |
| Smoker                                | 0.94 (0.84–1.04)                                                                | 1.15 (0.84–1.56)                                                                |
| <b>History of hypertension</b>        |                                                                                 |                                                                                 |
| No                                    | Ref                                                                             | Ref                                                                             |
| Yes                                   | 0.89 (0.84–0.95)                                                                | 0.97 (0.80–1.17)                                                                |
| <b>History of CVD</b>                 |                                                                                 |                                                                                 |
| No                                    | Ref                                                                             | Ref                                                                             |
| Yes                                   | 1.33 (1.22–1.43)                                                                | 2.09 (1.54–2.83)                                                                |
| <b>History of dyslipidaemia</b>       |                                                                                 |                                                                                 |
| No                                    | Ref                                                                             | Ref                                                                             |
| Yes                                   | 1.10 (1.01–1.19)                                                                | 1.40 (1.11–1.76)                                                                |
| <b>History of CKD</b>                 |                                                                                 |                                                                                 |
| No                                    | Ref                                                                             | Ref                                                                             |
| Yes                                   | 1.05 (0.91–1.20)                                                                | 1.19 (0.62–2.30)                                                                |
| <b>History of liver disease</b>       |                                                                                 |                                                                                 |
| No                                    | Ref                                                                             | Ref                                                                             |
| Yes                                   | 1.14 (0.78–1.68)                                                                | 3.37 (1.08–10.57)                                                               |
| <b>History of depressive syndrome</b> |                                                                                 |                                                                                 |
| No                                    | Ref                                                                             | Ref                                                                             |
| Yes                                   | 0.94 (0.87–1.03)                                                                | 0.87 (0.67–1.13)                                                                |

HbA1c: Haemoglobin A1c; LDL-C: Low-density lipoprotein cholesterol; GP: General practitioner; Ref: Reference group; 95%CI: 95% Confidence interval; IRSAD: Index of Relative Socio-economic Advantage and Disadvantage; CVD: Cardiovascular disease (including heart failure, ischemic heart disease, and stroke); CKD: Chronic kidney disease.

<sup>†</sup> 'All-controlled' are those patients with HbA1c $\leq$ 7.0%, BP $\leq$ 140/90mmHg, and total cholesterol  $<$ 4.0mmol/L. Adjusted odds ratio of patients who had each clinical parameter controlled based on logistic regression models adjusted for practice characteristics (remoteness, IRSAD quintiles), patient sociodemographics (gender, age), and clinical characteristics (smoking status, history of hypertension, CVD, CKD, dyslipidaemia, liver disease, or depressive symptoms).
